# Supplementary material
Source: publisher figshare collection journal article supplement (https://acs.figshare.com/ndownloader/files/3809506)

# Synthesis and chemical reactivity of tetrahydro[60]fullerene epoxides with both amino and aryl addends

Sisi Liang<sup>a</sup>, Liang Xu<sup>a</sup>, Liangbing Gan<sup>\*,ab</sup>

<sup>a</sup>Beijing National Laboratory for Molecular Sciences, Key Laboratory of Bioorganic

Chemistry and Molecular Engineering of the Ministry of Education, College of Chemistry

and Molecular Engineering, Peking University, Beijing 100871, China.

<sup>b</sup>State Key Laboratory of Organometallic Chemistry, Shanghai Institute of Organic

Chemistry, Shanghai 200032, China.

## Table of Contents

|                                                                             |         |
|-----------------------------------------------------------------------------|---------|
| Possible mechanism for the <b>10a</b> and <b>10b</b>                        | S2      |
| <sup>1</sup> H and <sup>13</sup> C NMR spectra for compound <b>3</b>        | S3-S4   |
| <sup>1</sup> H and <sup>13</sup> C NMR spectra for compound <b>4</b>        | S5-S6   |
| <sup>1</sup> H NMR spectra for compound <b>5</b>                            | S7      |
| <sup>1</sup> H and <sup>13</sup> C NMR spectra for compound <b>6</b>        | S8-S9   |
| <sup>1</sup> H and <sup>13</sup> C NMR spectra for compound <b>6a</b>       | S10-S11 |
| <sup>1</sup> H and <sup>13</sup> C NMR spectra for compound <b>7</b>        | S12-S13 |
| <sup>1</sup> H and <sup>13</sup> C NMR spectra for compound <b>8b</b>       | S14-S15 |
| <sup>1</sup> H and <sup>13</sup> C NMR spectra for compound <b>8c</b>       | S16-S17 |
| <sup>1</sup> H and <sup>13</sup> C NMR and IR spectra for compound <b>9</b> | S18-S20 |
| <sup>1</sup> H and <sup>13</sup> C NMR spectra for compound <b>10a</b>      | S21-S22 |
| <sup>1</sup> H and <sup>13</sup> C NMR spectra for compound <b>10b</b>      | S23-S24 |
| <sup>1</sup> H and <sup>13</sup> C NMR spectra for compound <b>11</b>       | S25-S26 |
| <sup>1</sup> H NMR spectra for compound <b>13</b>                           | S27     |
| <sup>1</sup> H and <sup>13</sup> C NMR spectra for compound <b>14</b>       | S28-S29 |
| <sup>1</sup> H and <sup>13</sup> C NMR spectra for compound <b>15</b>       | S30-S31 |
| <sup>1</sup> H and <sup>13</sup> C NMR spectra for compound <b>16</b>       | S32-S34 |
| <sup>1</sup> H and <sup>13</sup> C NMR spectra for compound <b>17</b>       | S35-S36 |

Possible mechanism for formation of **10a** and **10b**

Reference Huang, S. H.; Wang, F. D.; Gan, L. B.; Yuan, G.; Zhou, J.; Zhang, S. W. *Org. Lett.* **2006**, *8*, 277. In this work compound **M** was the only isolated product.

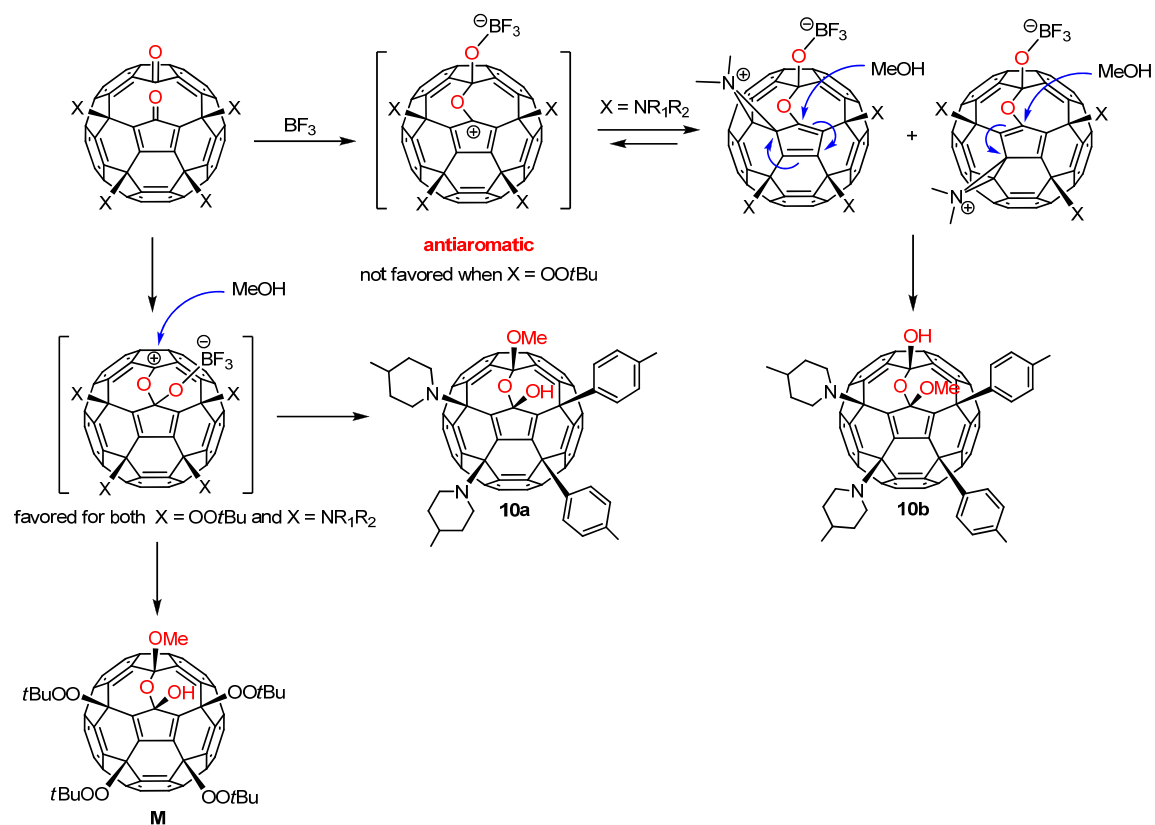

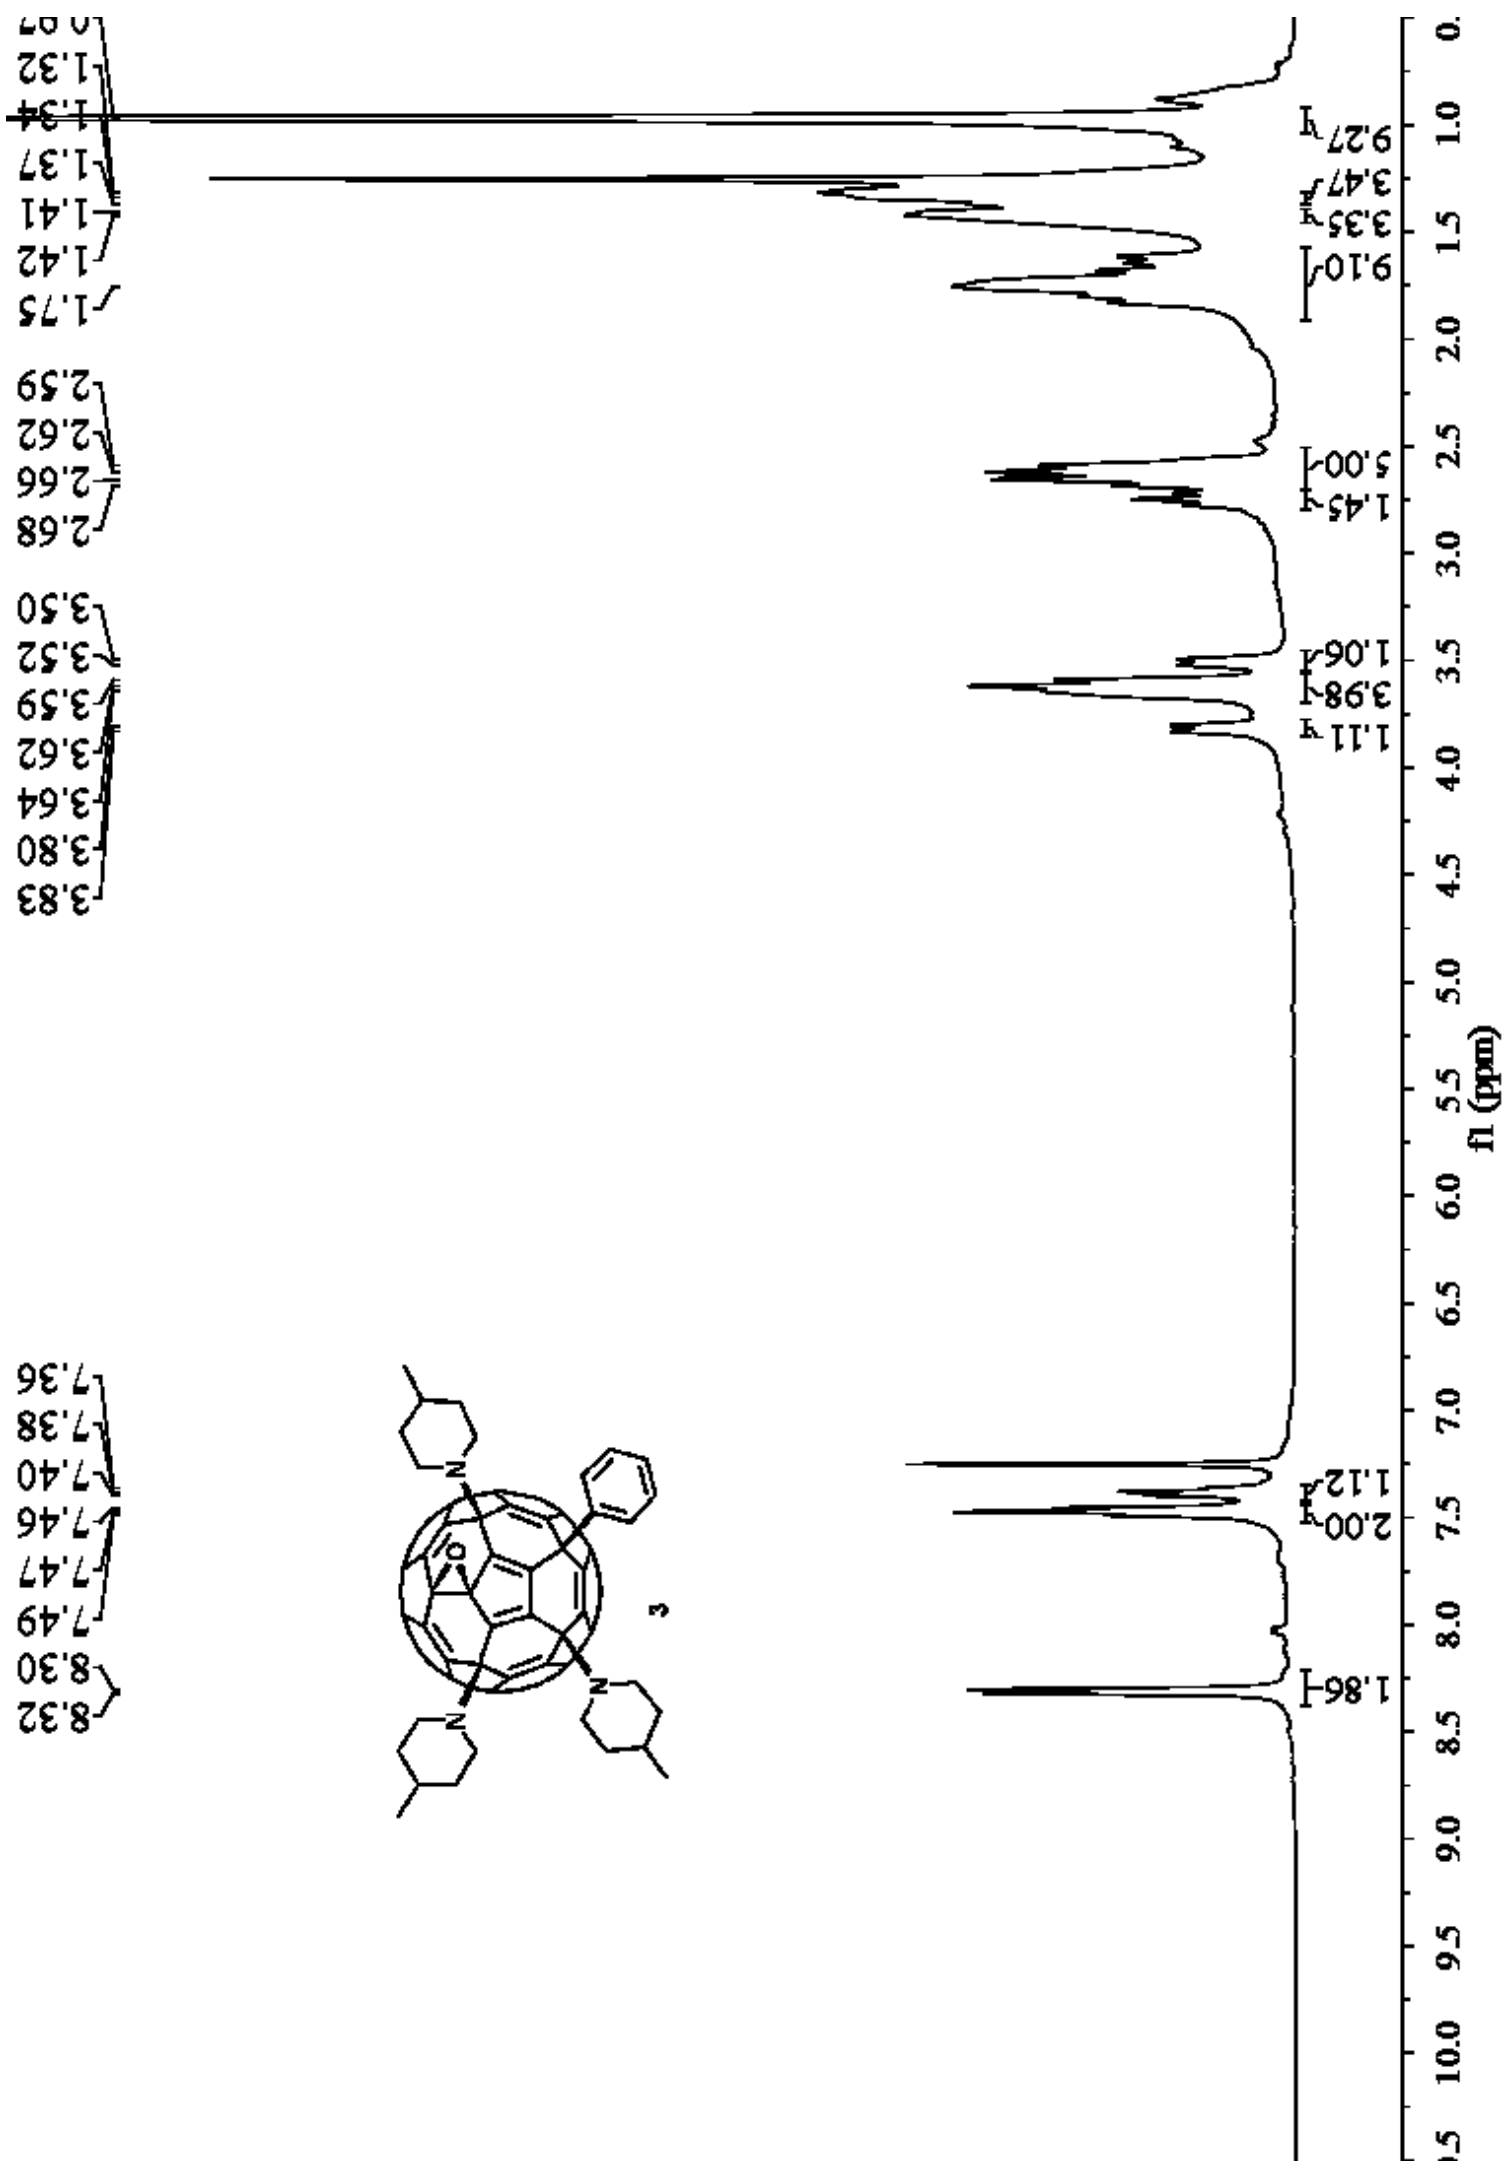



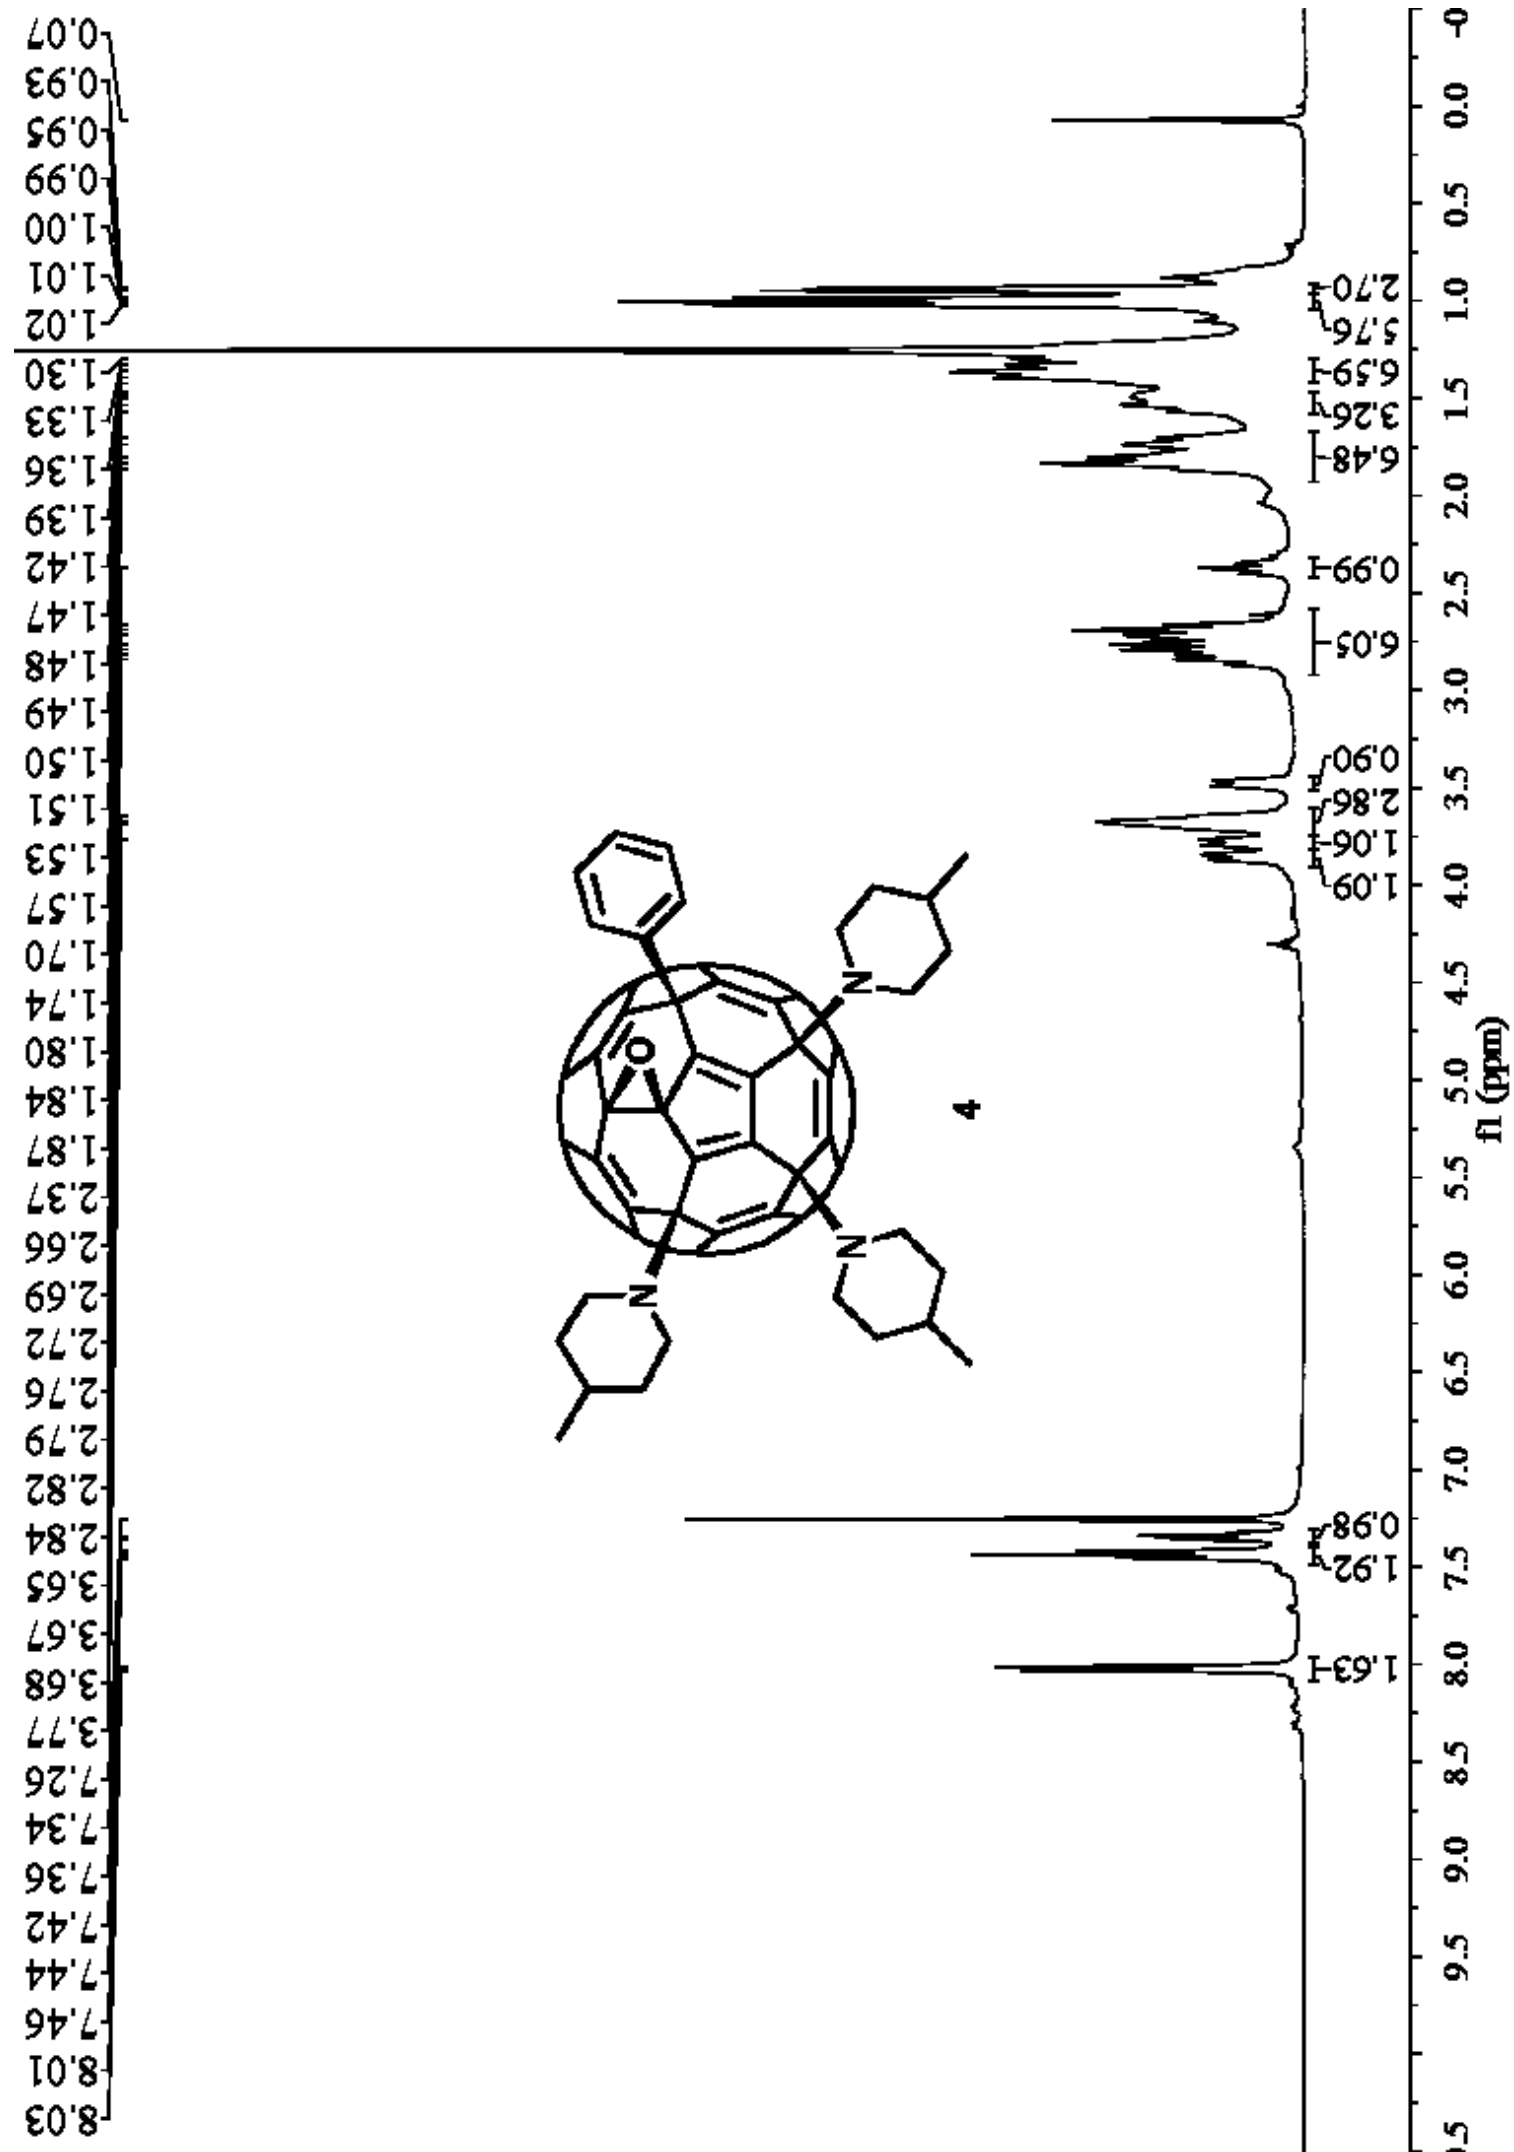

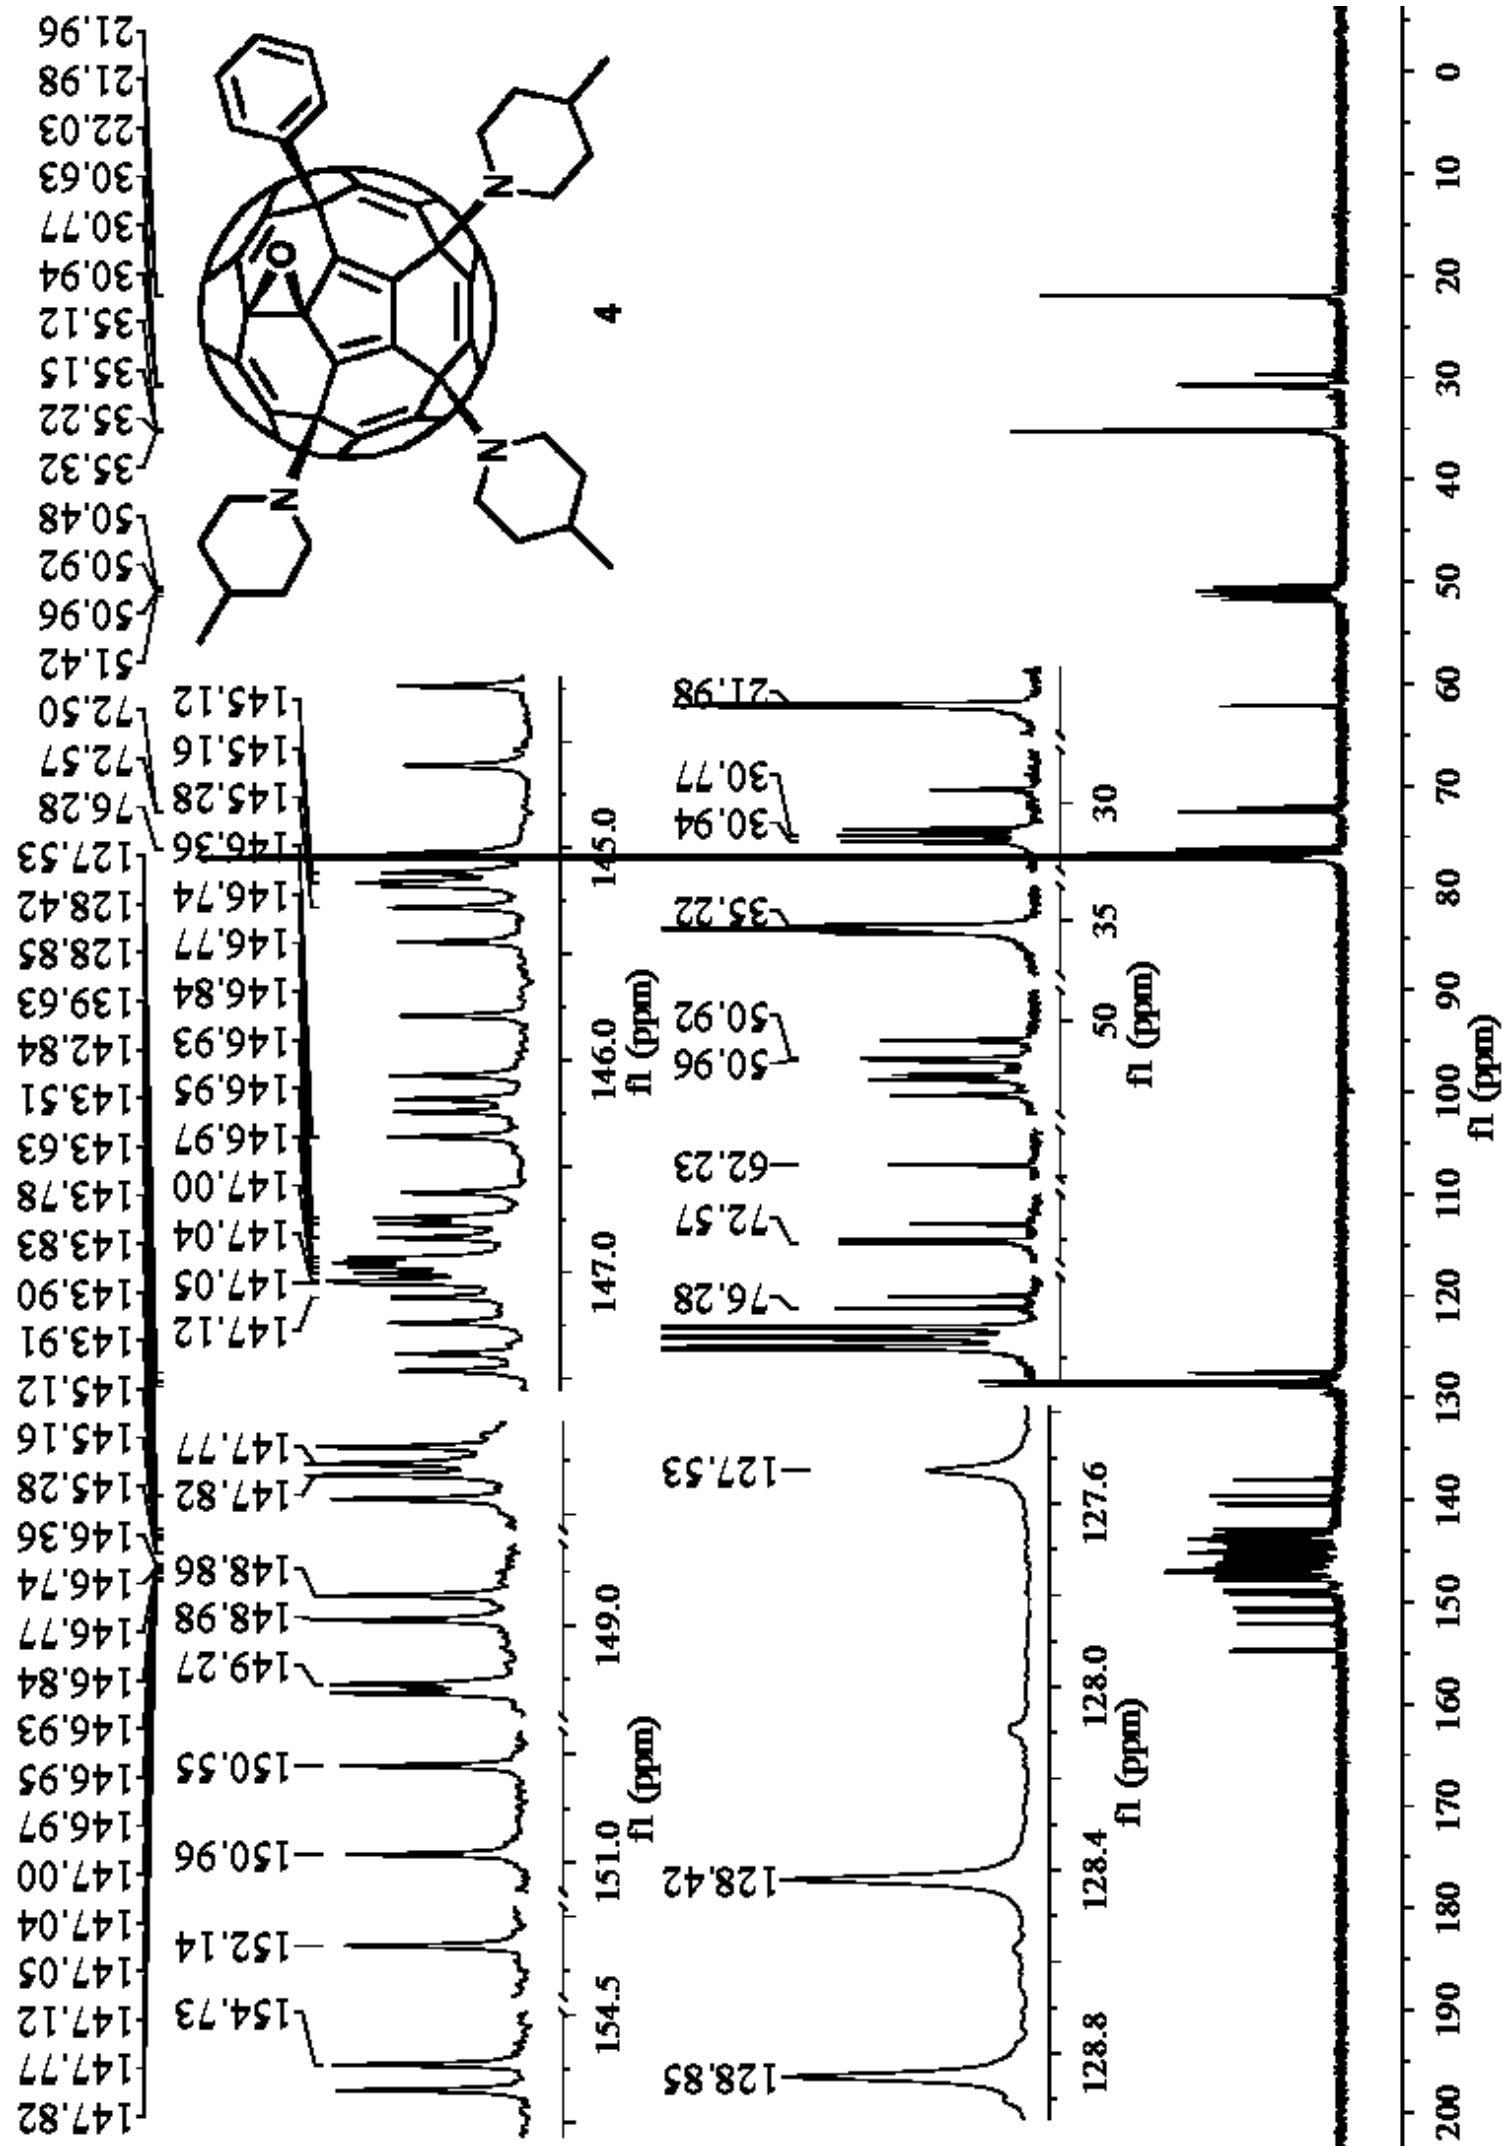



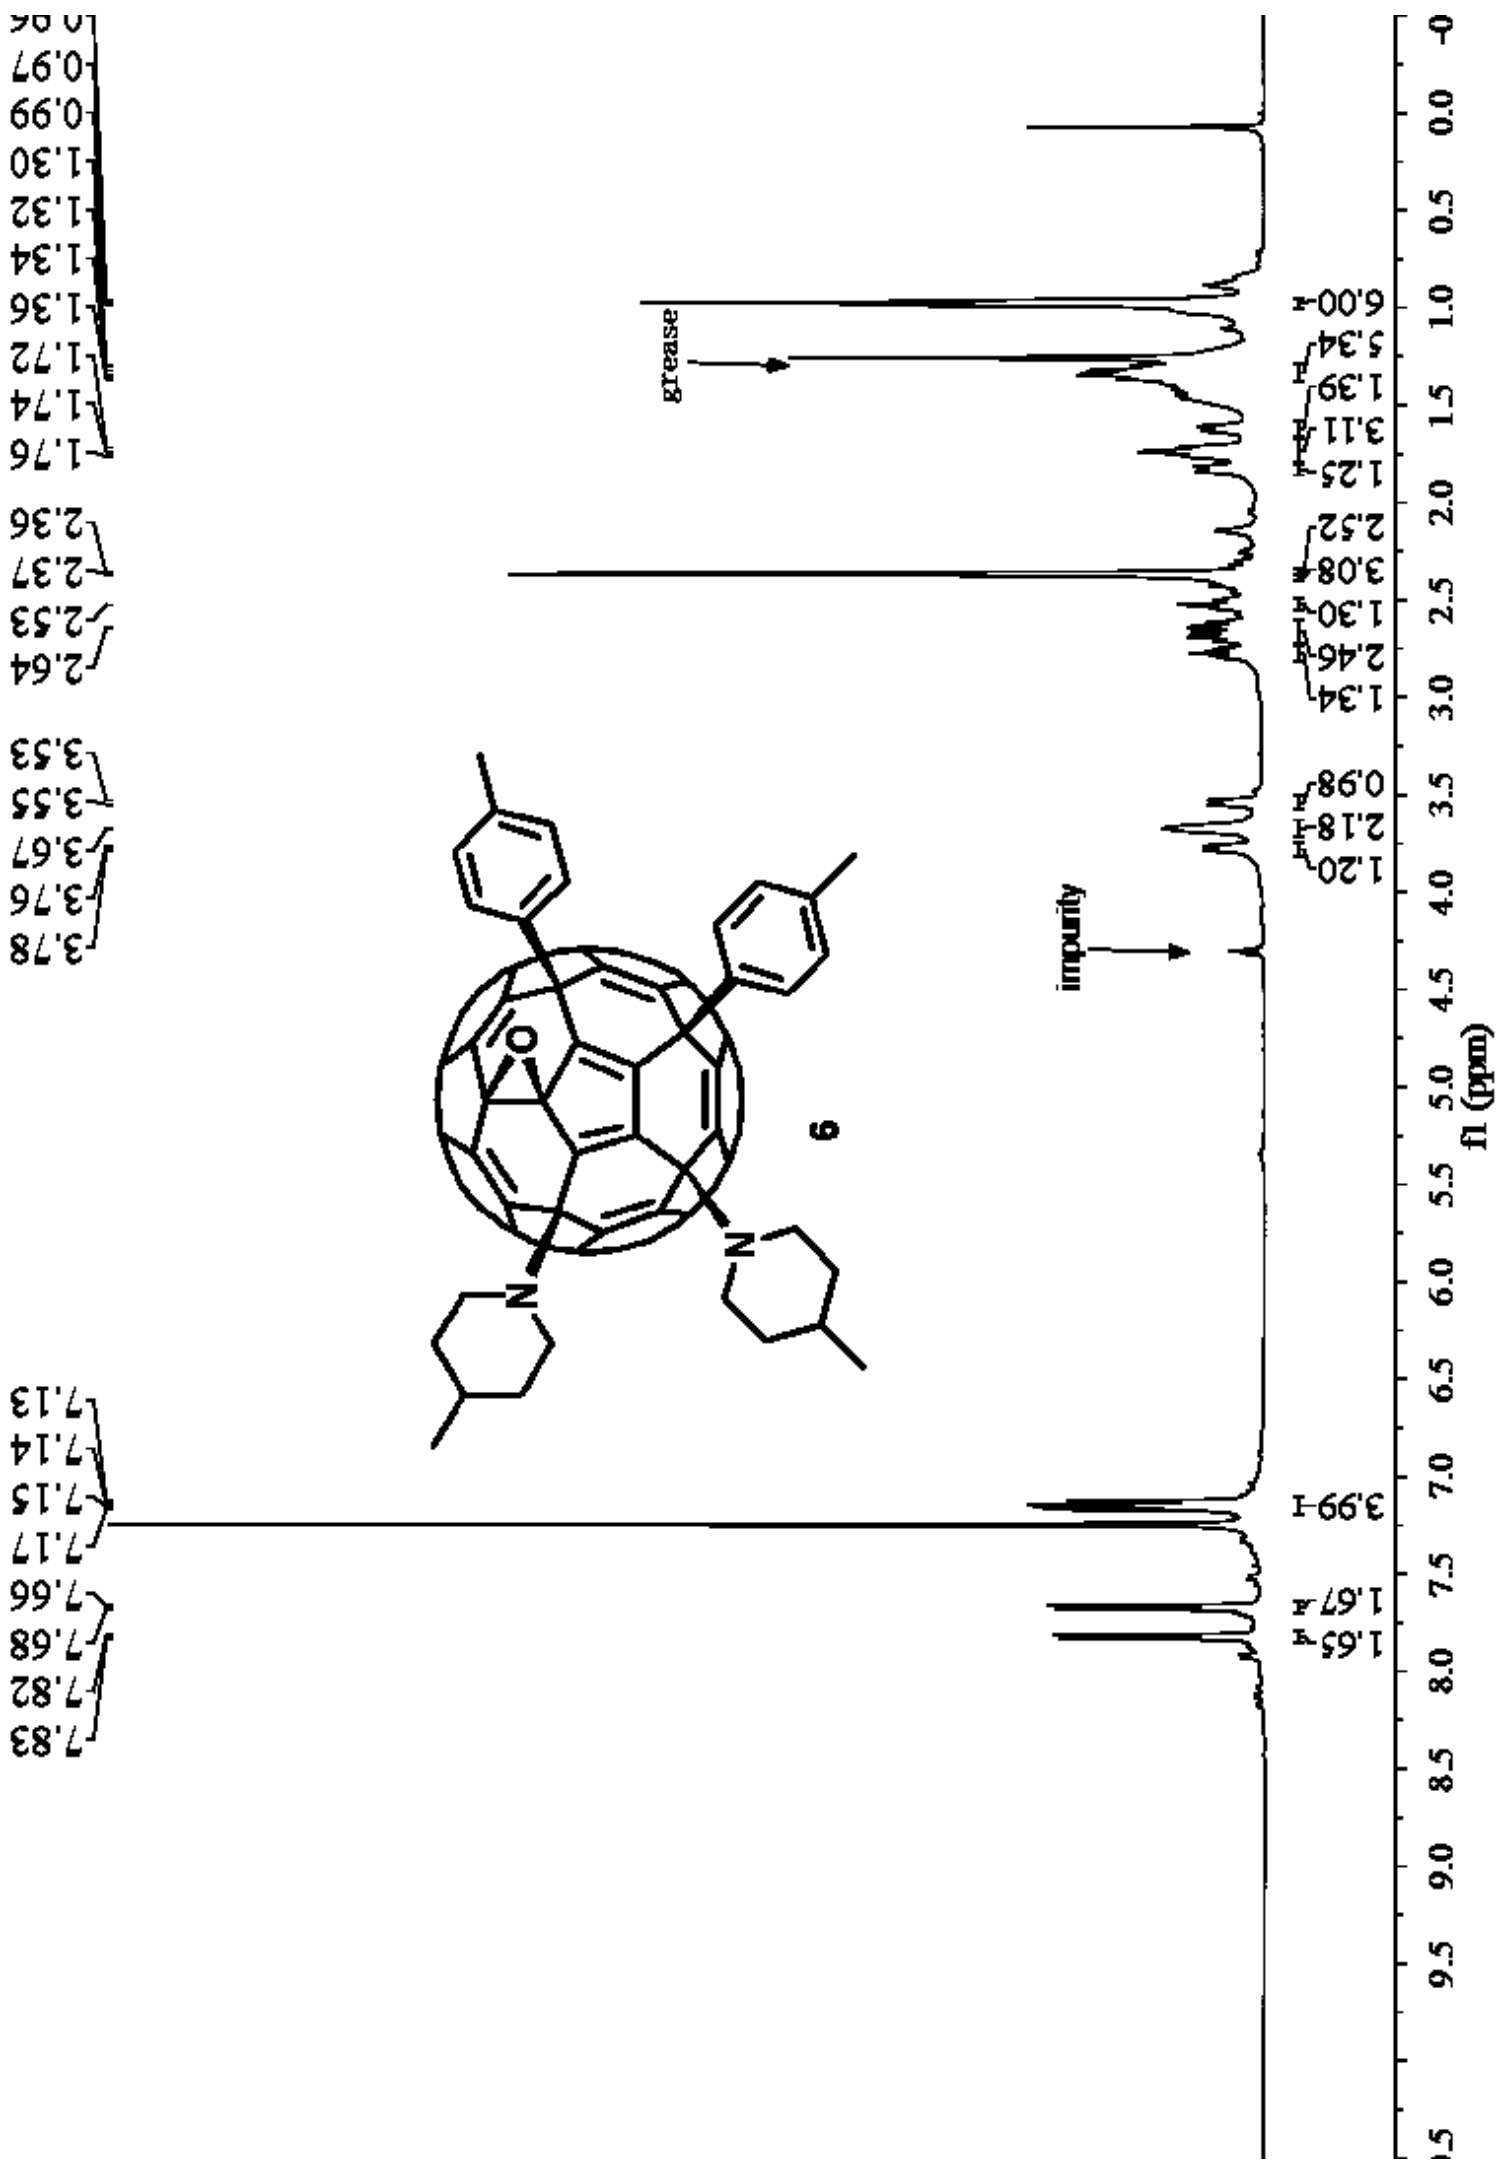



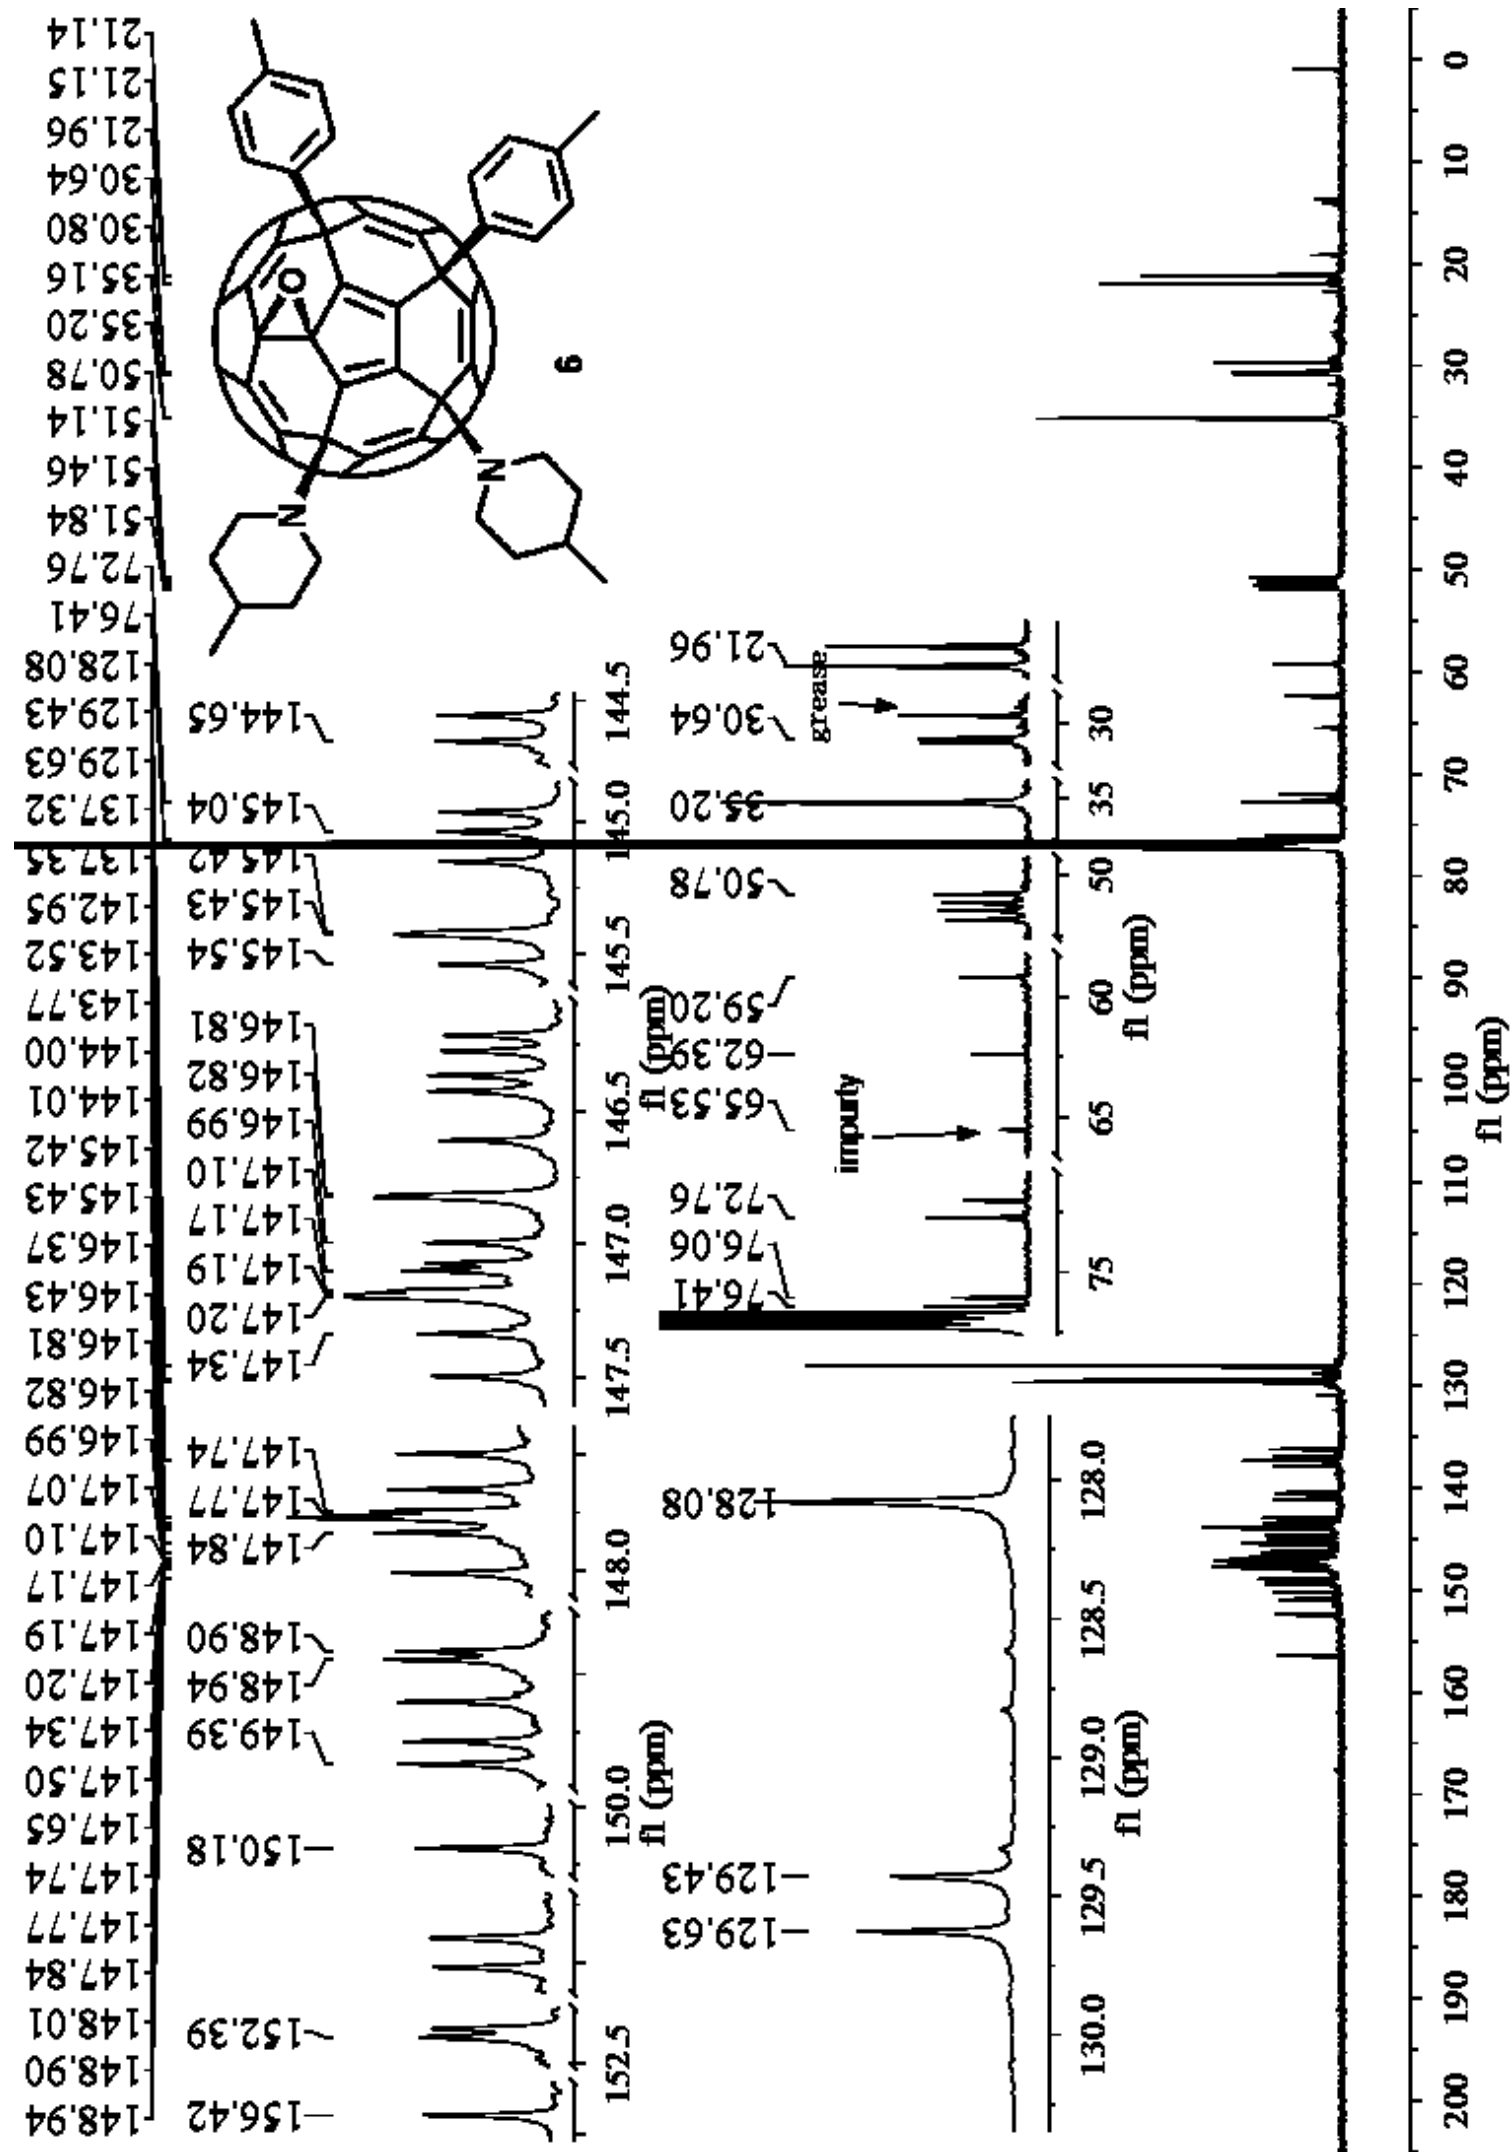

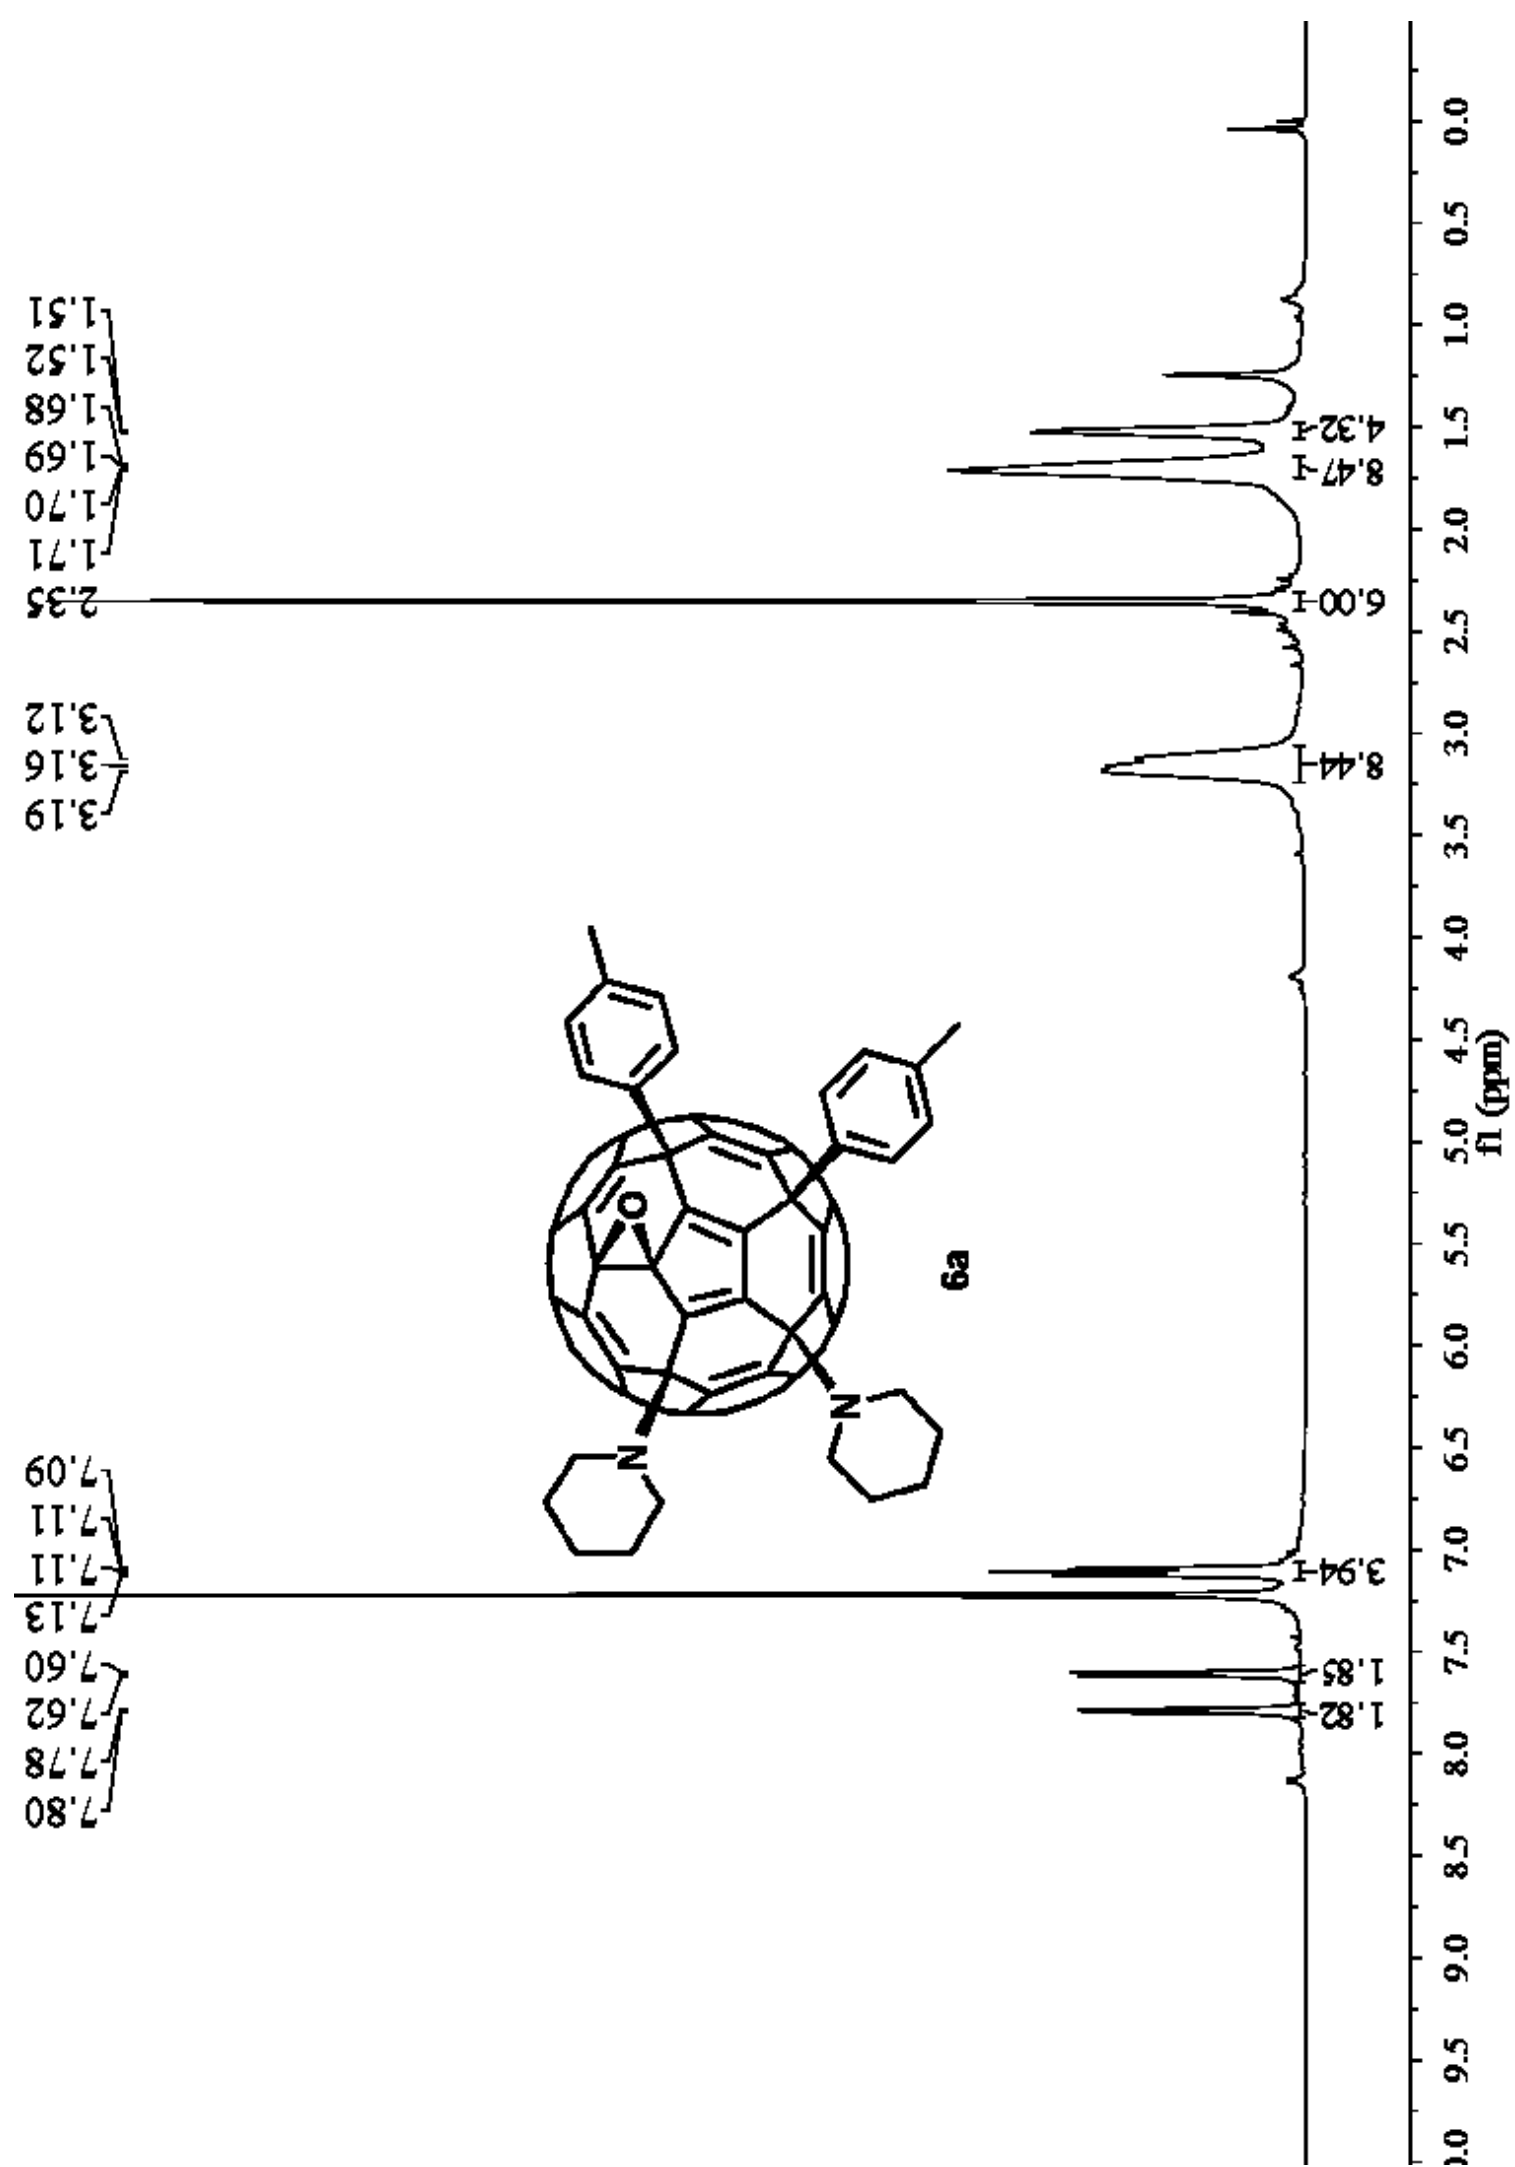

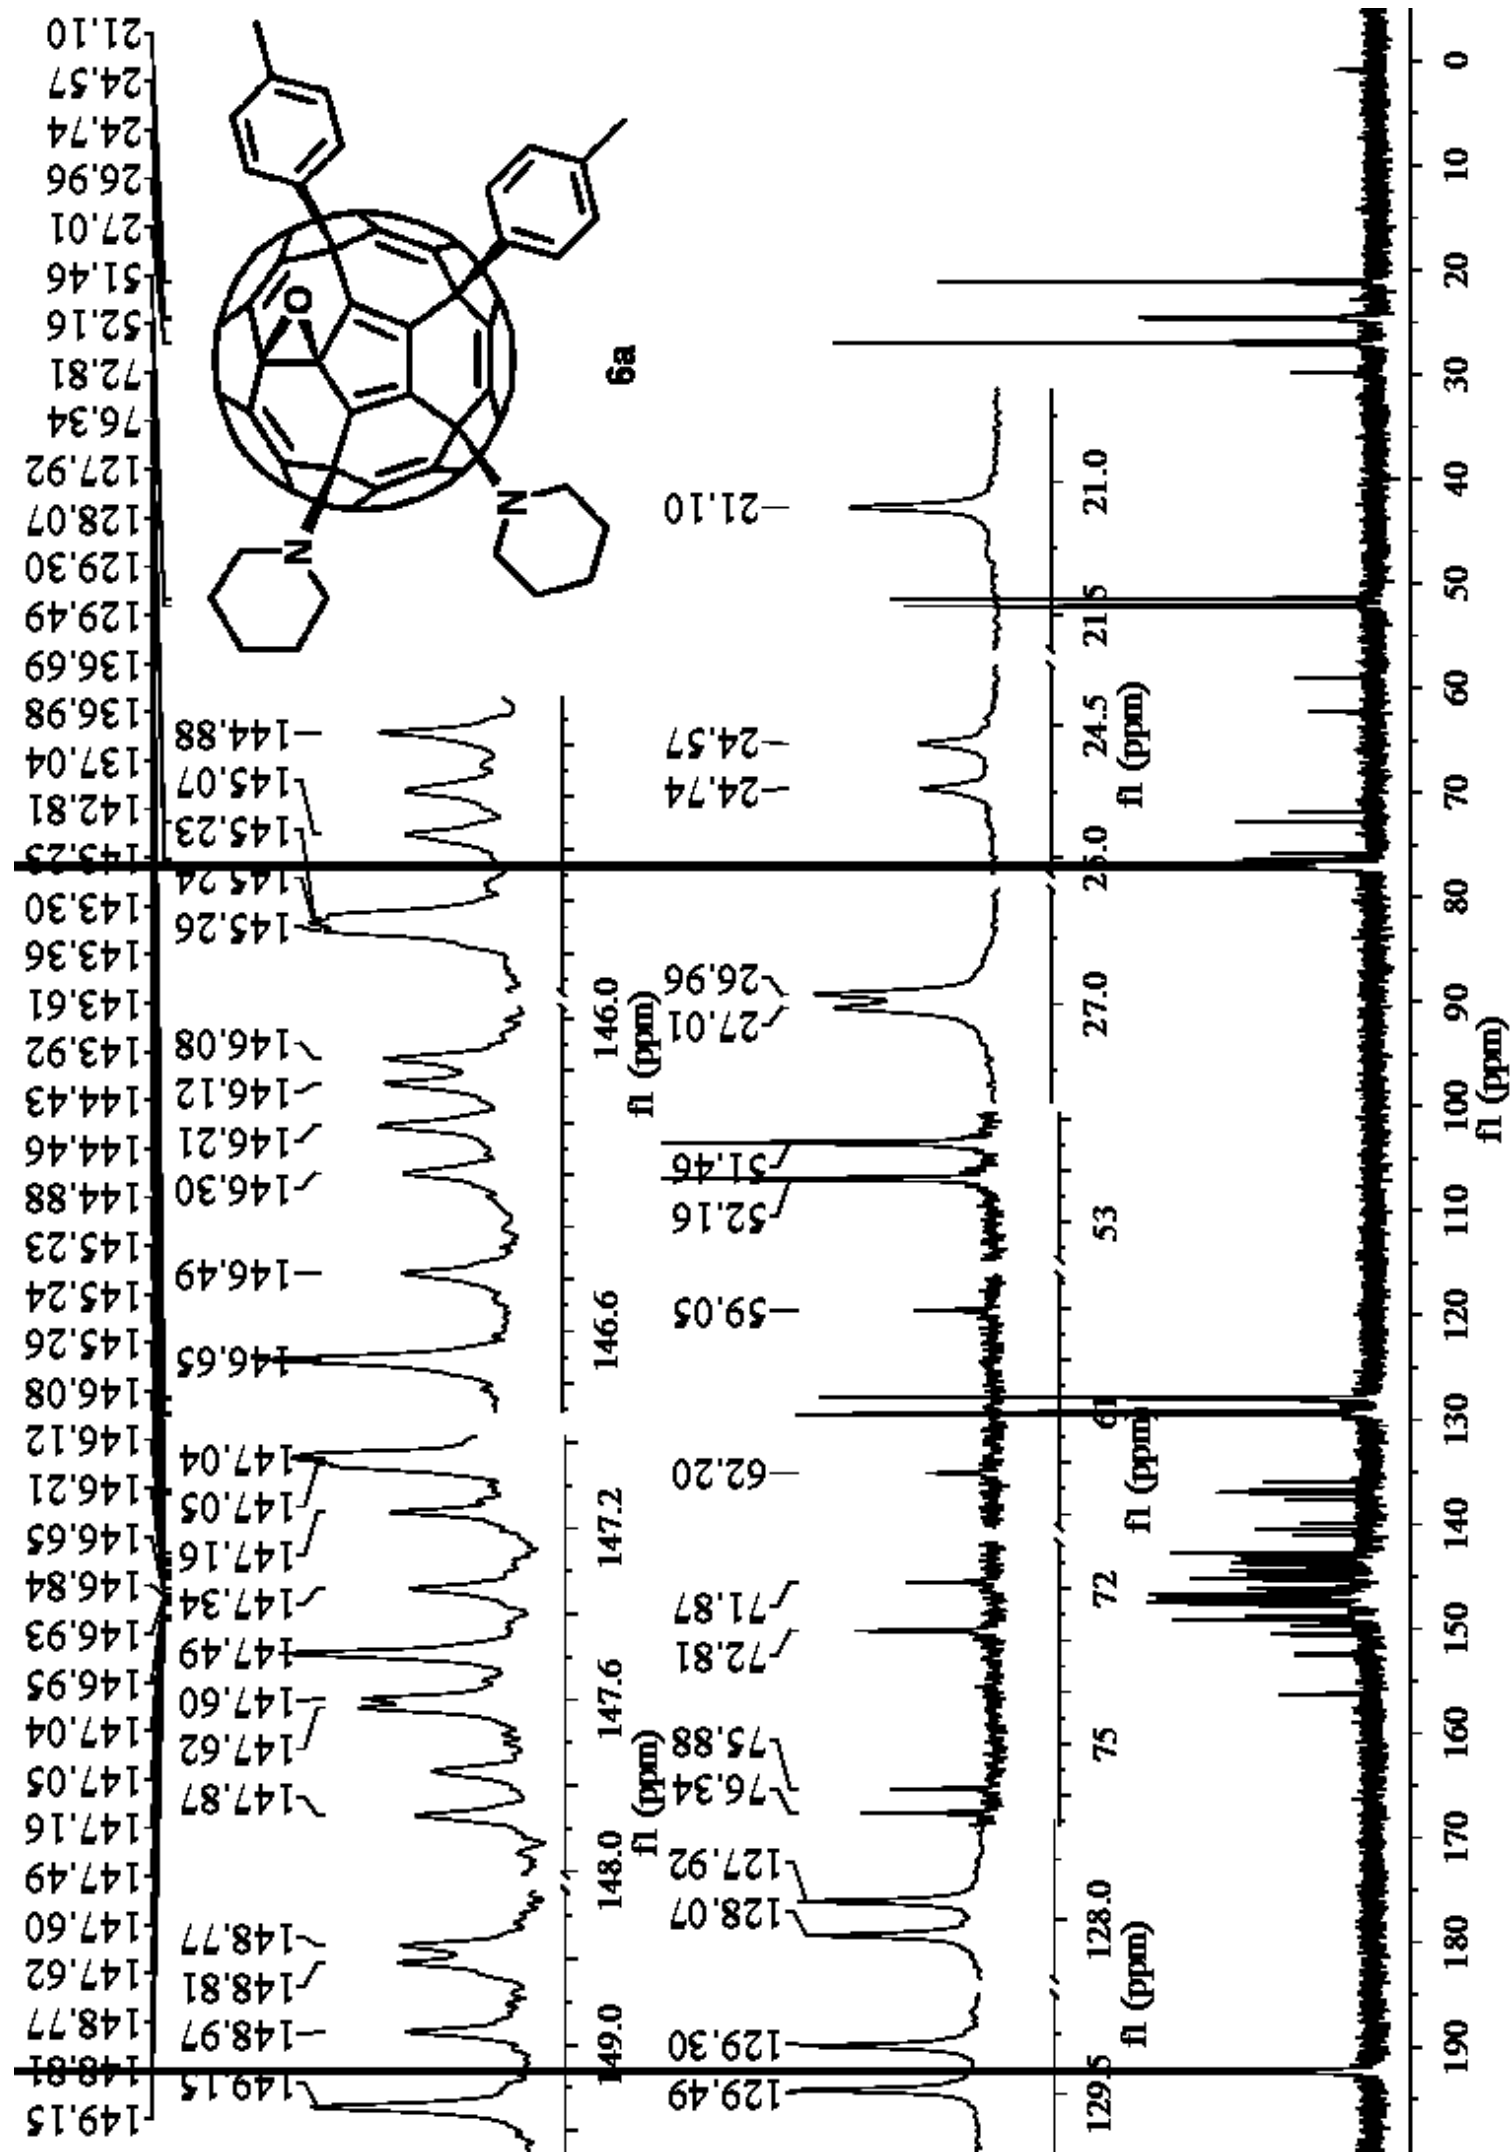

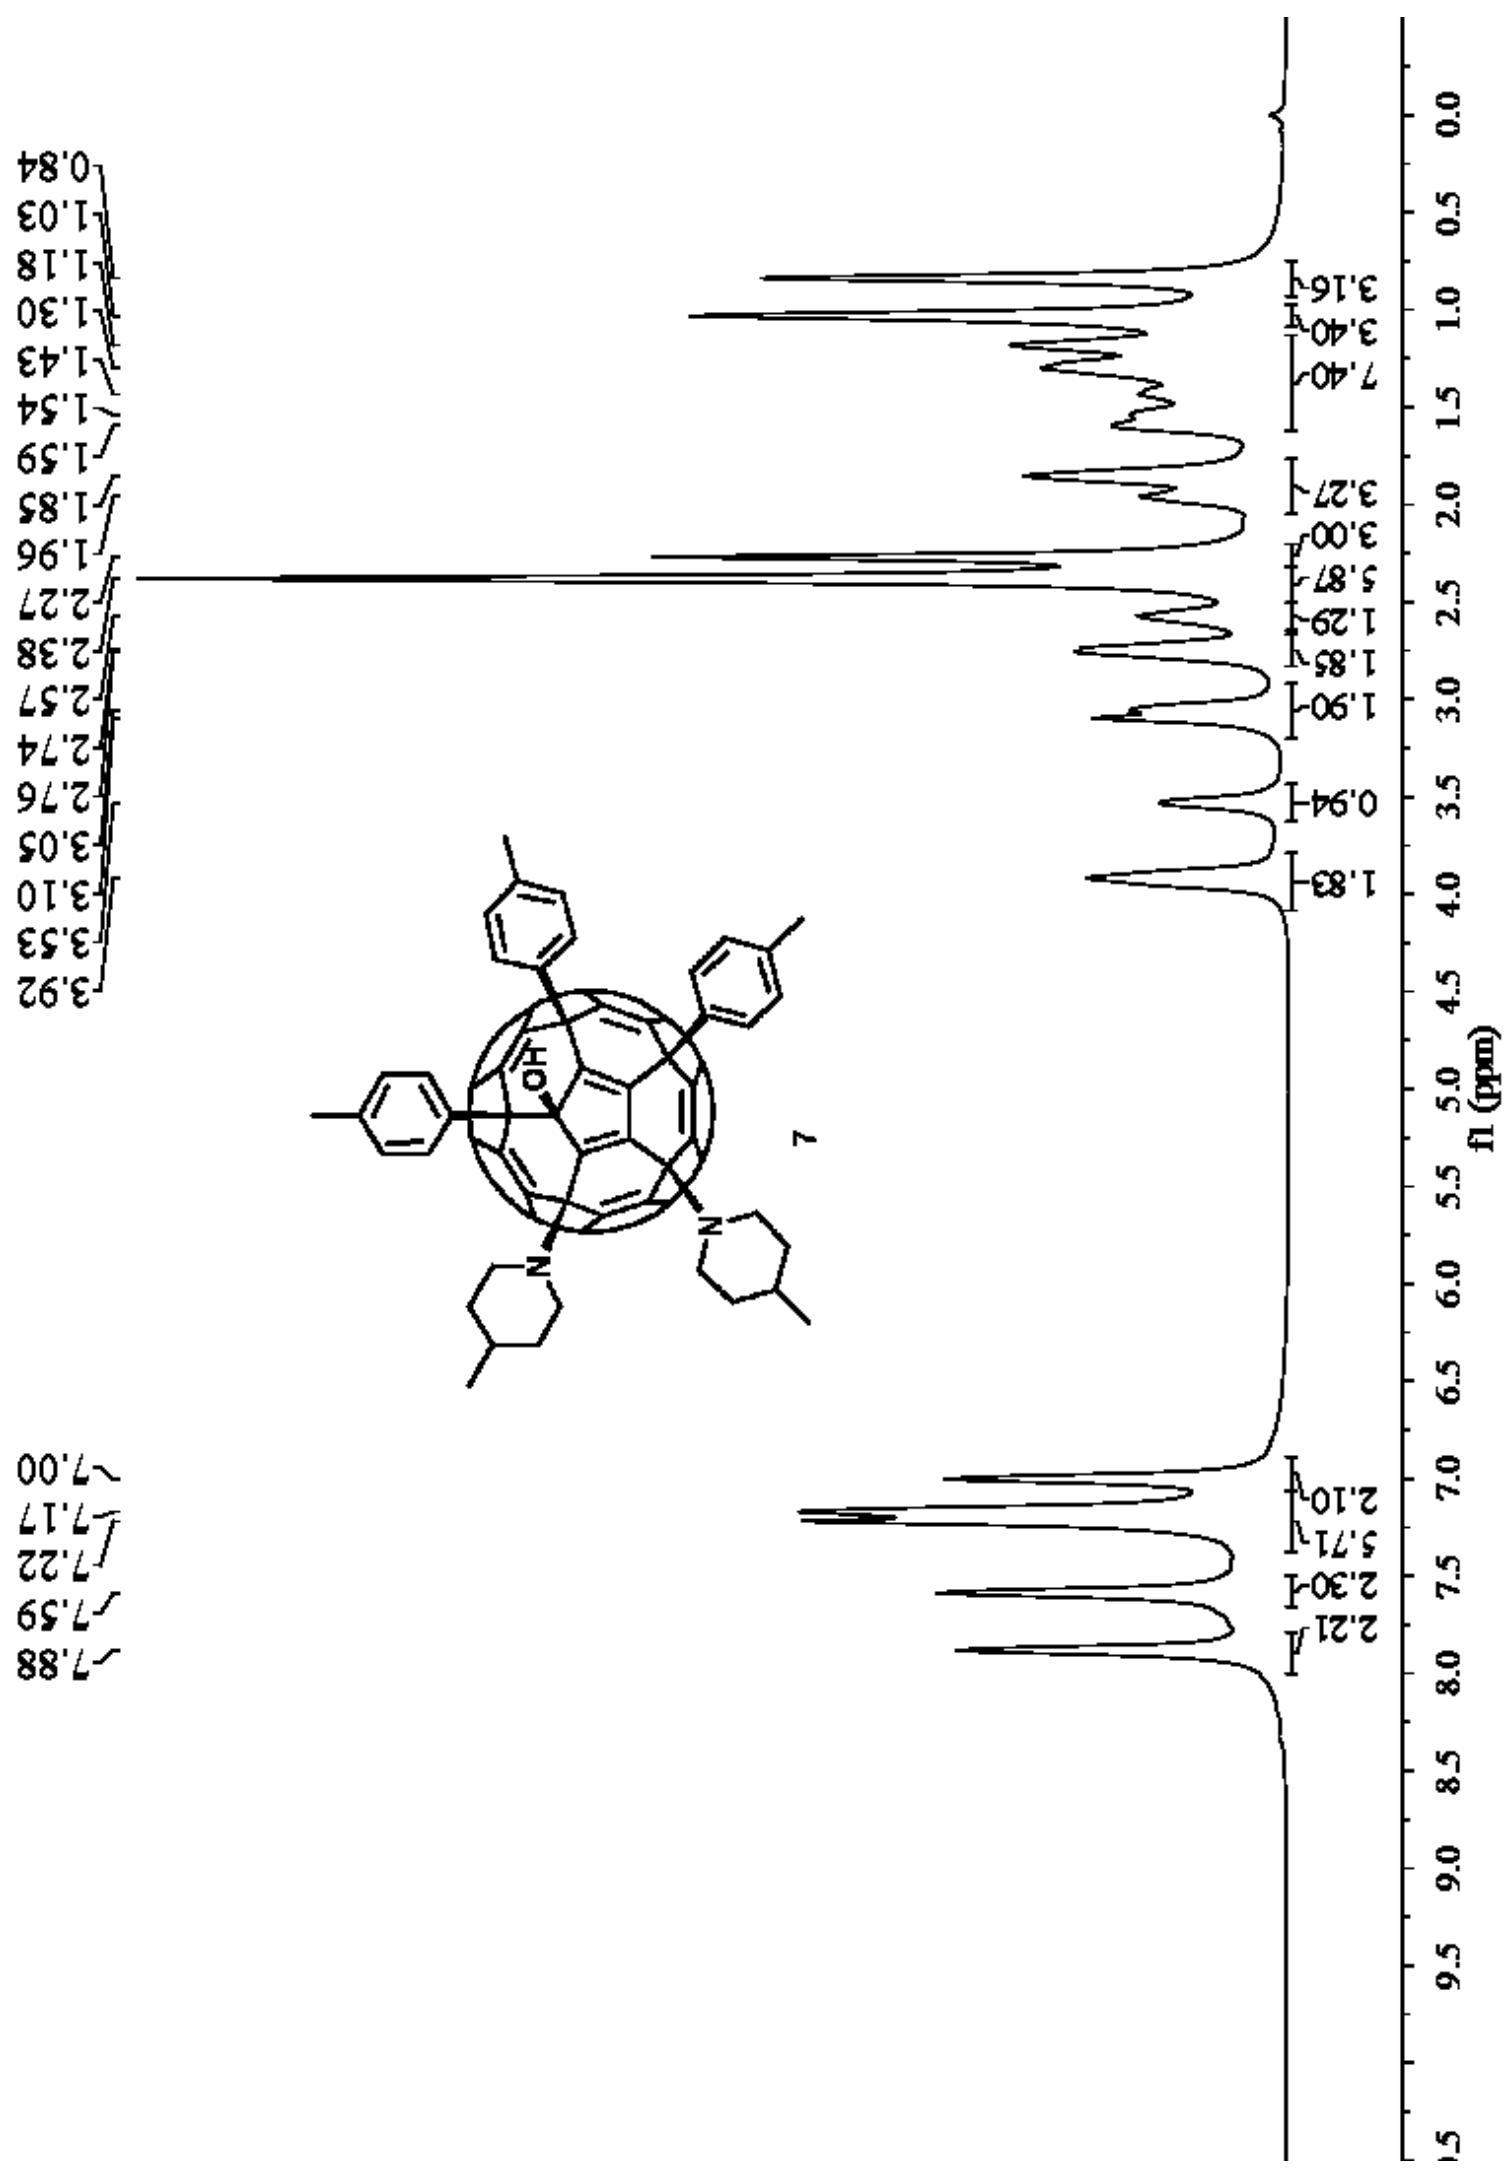

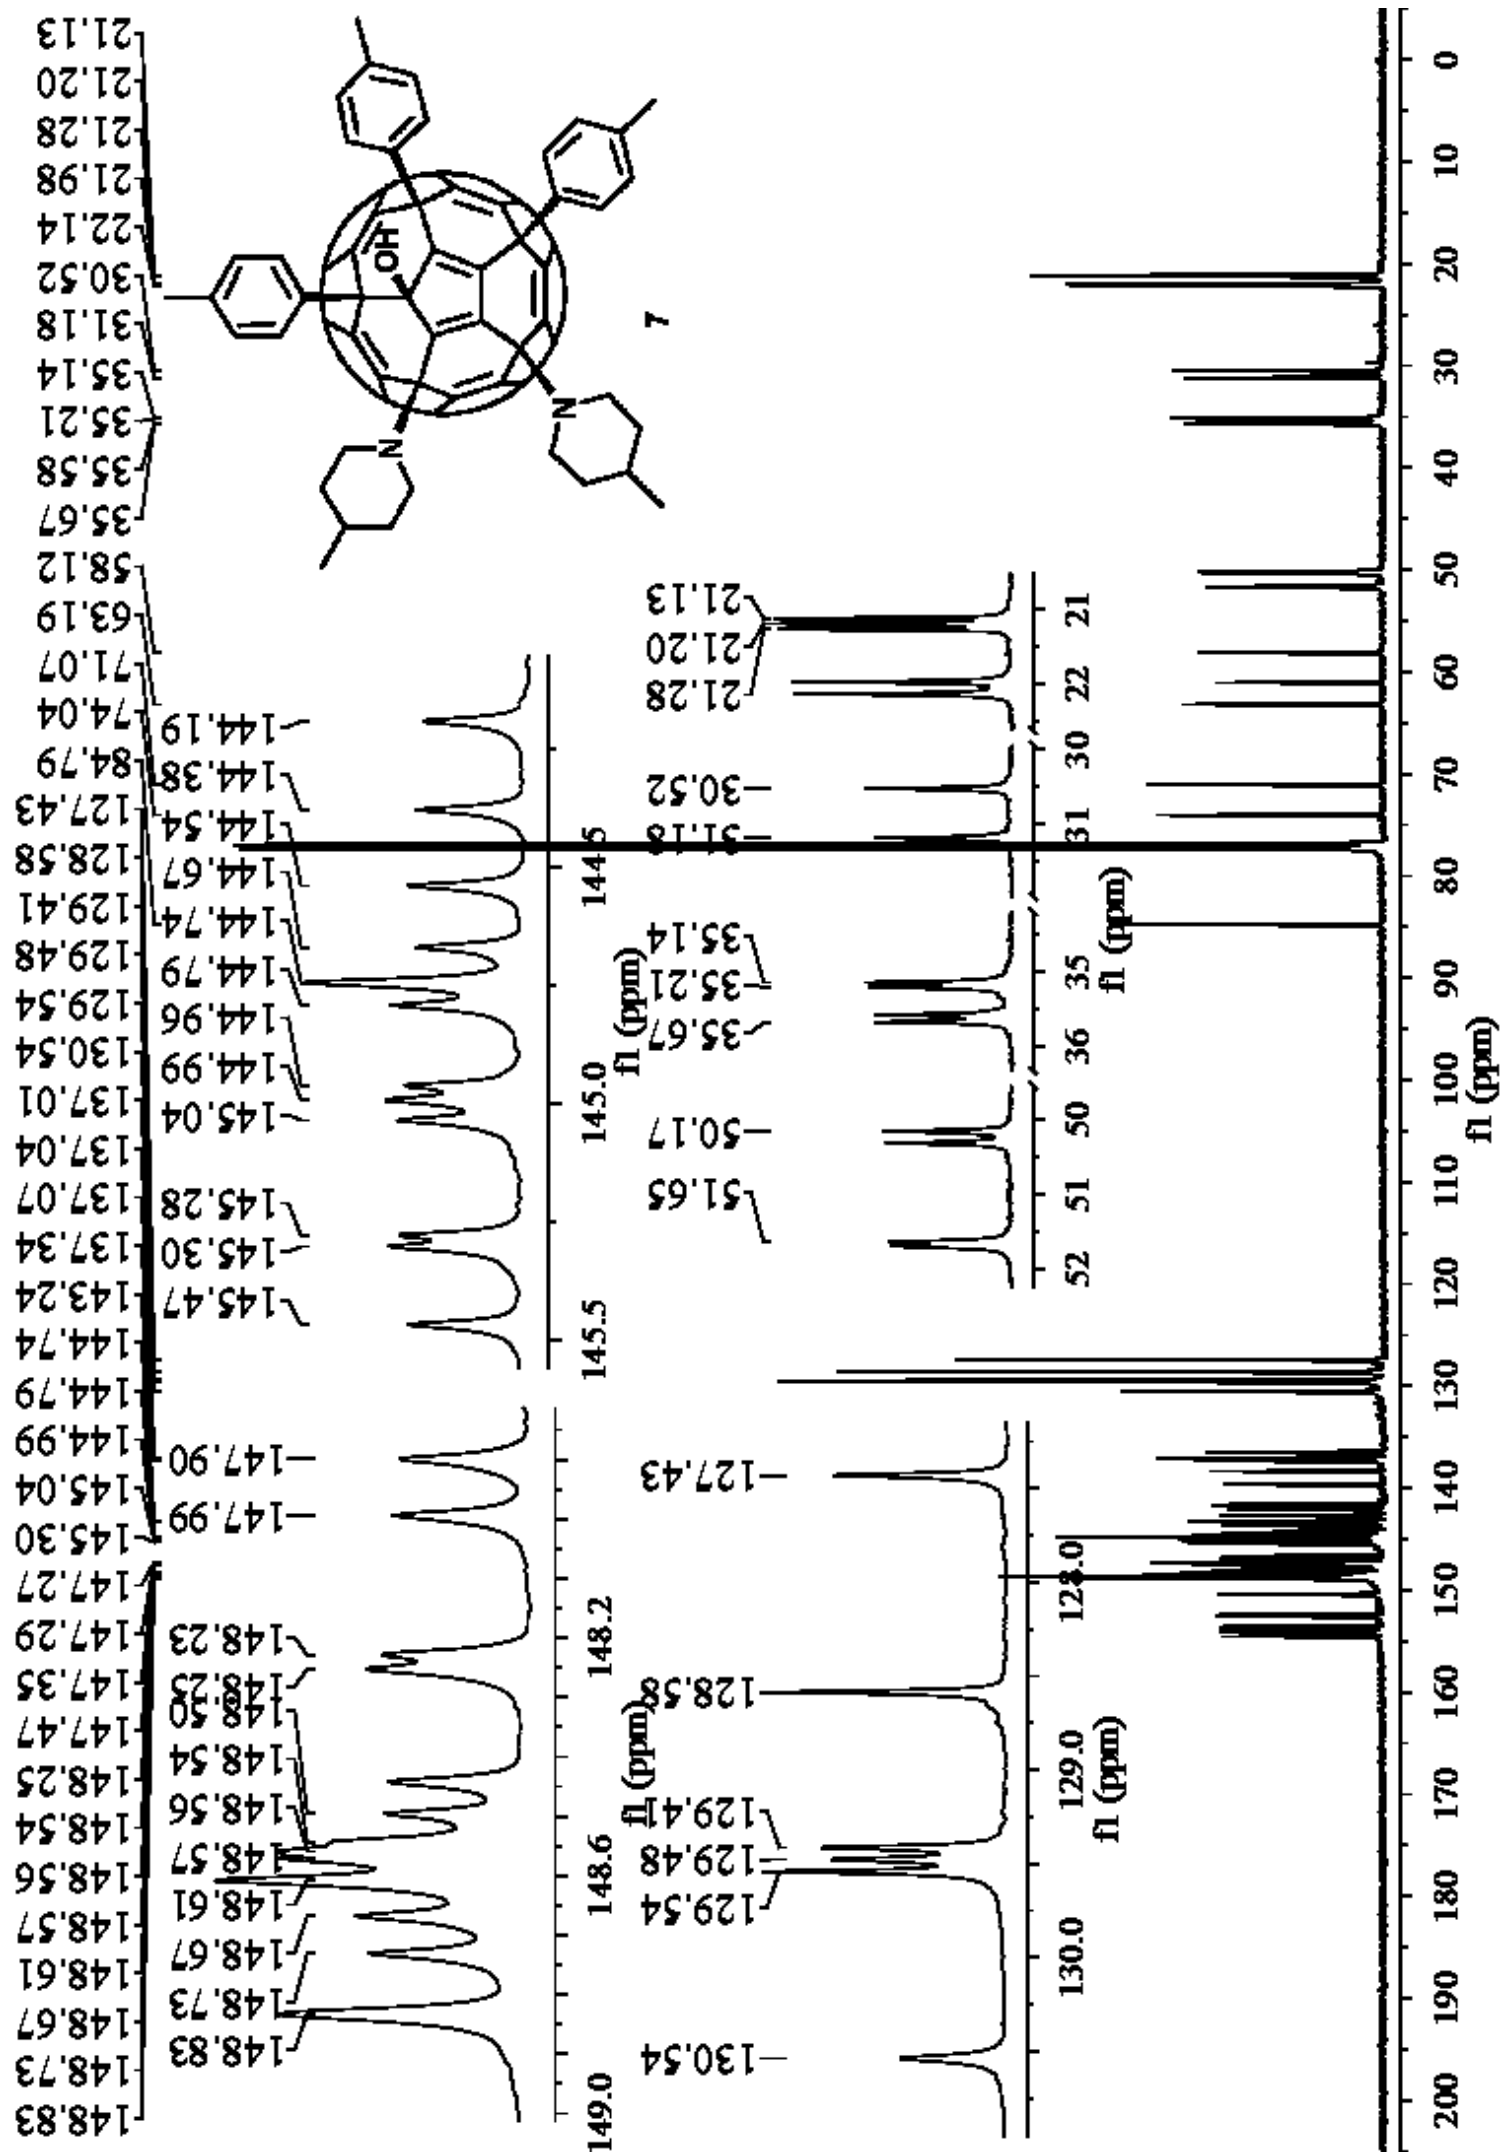

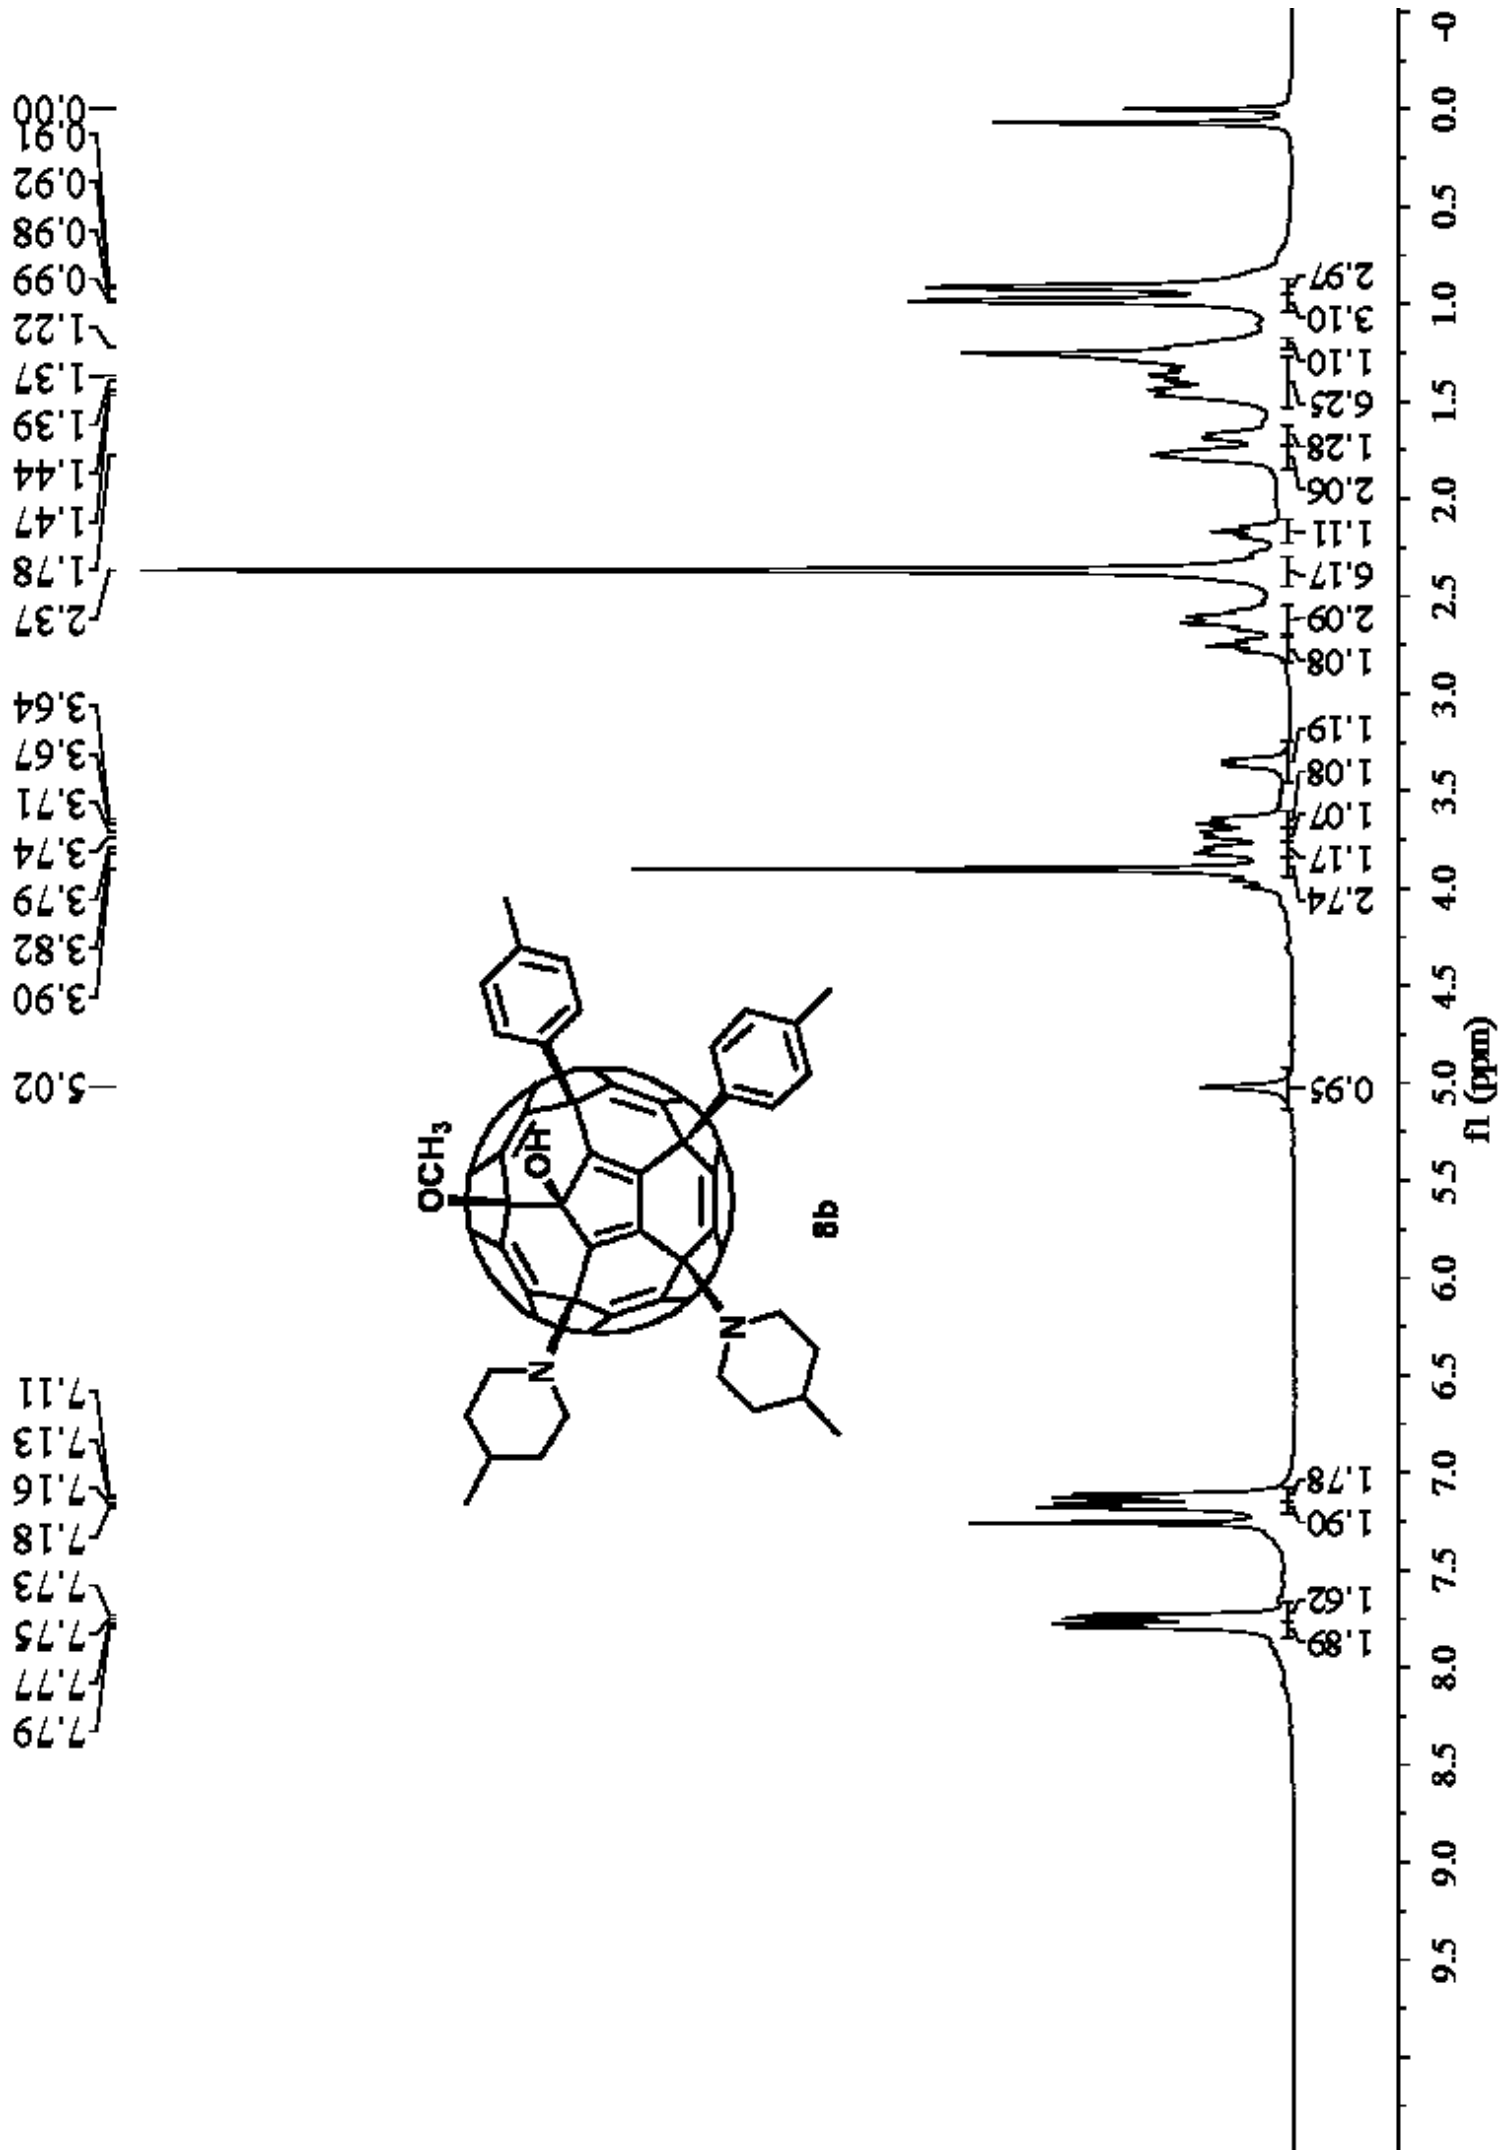

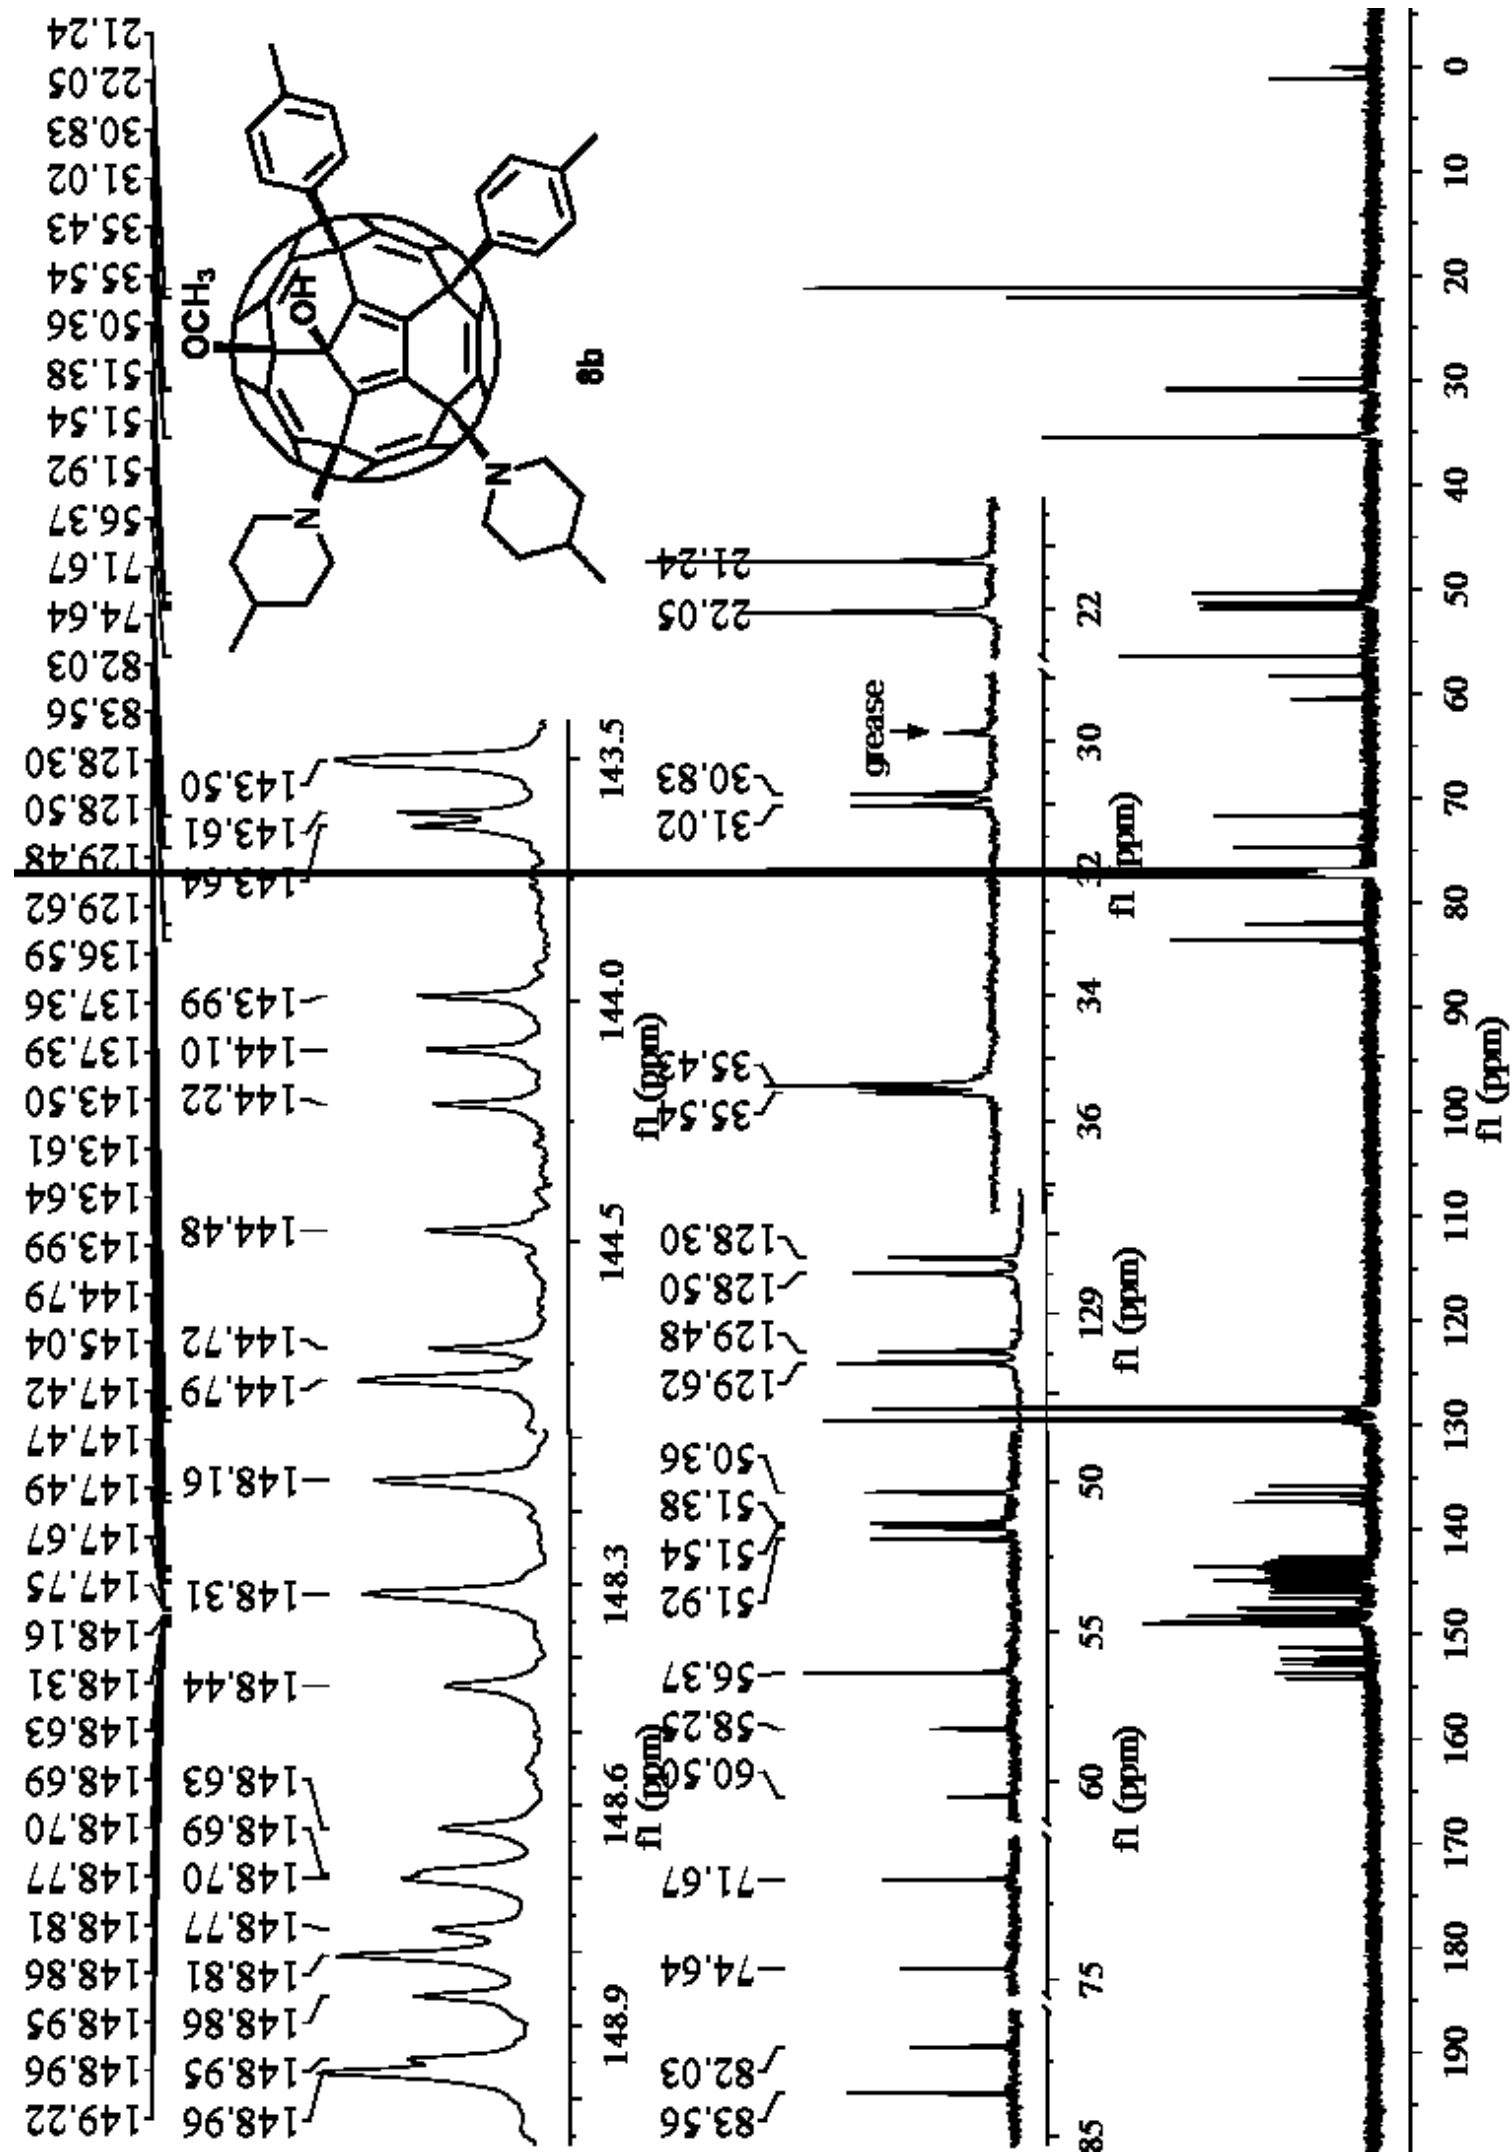

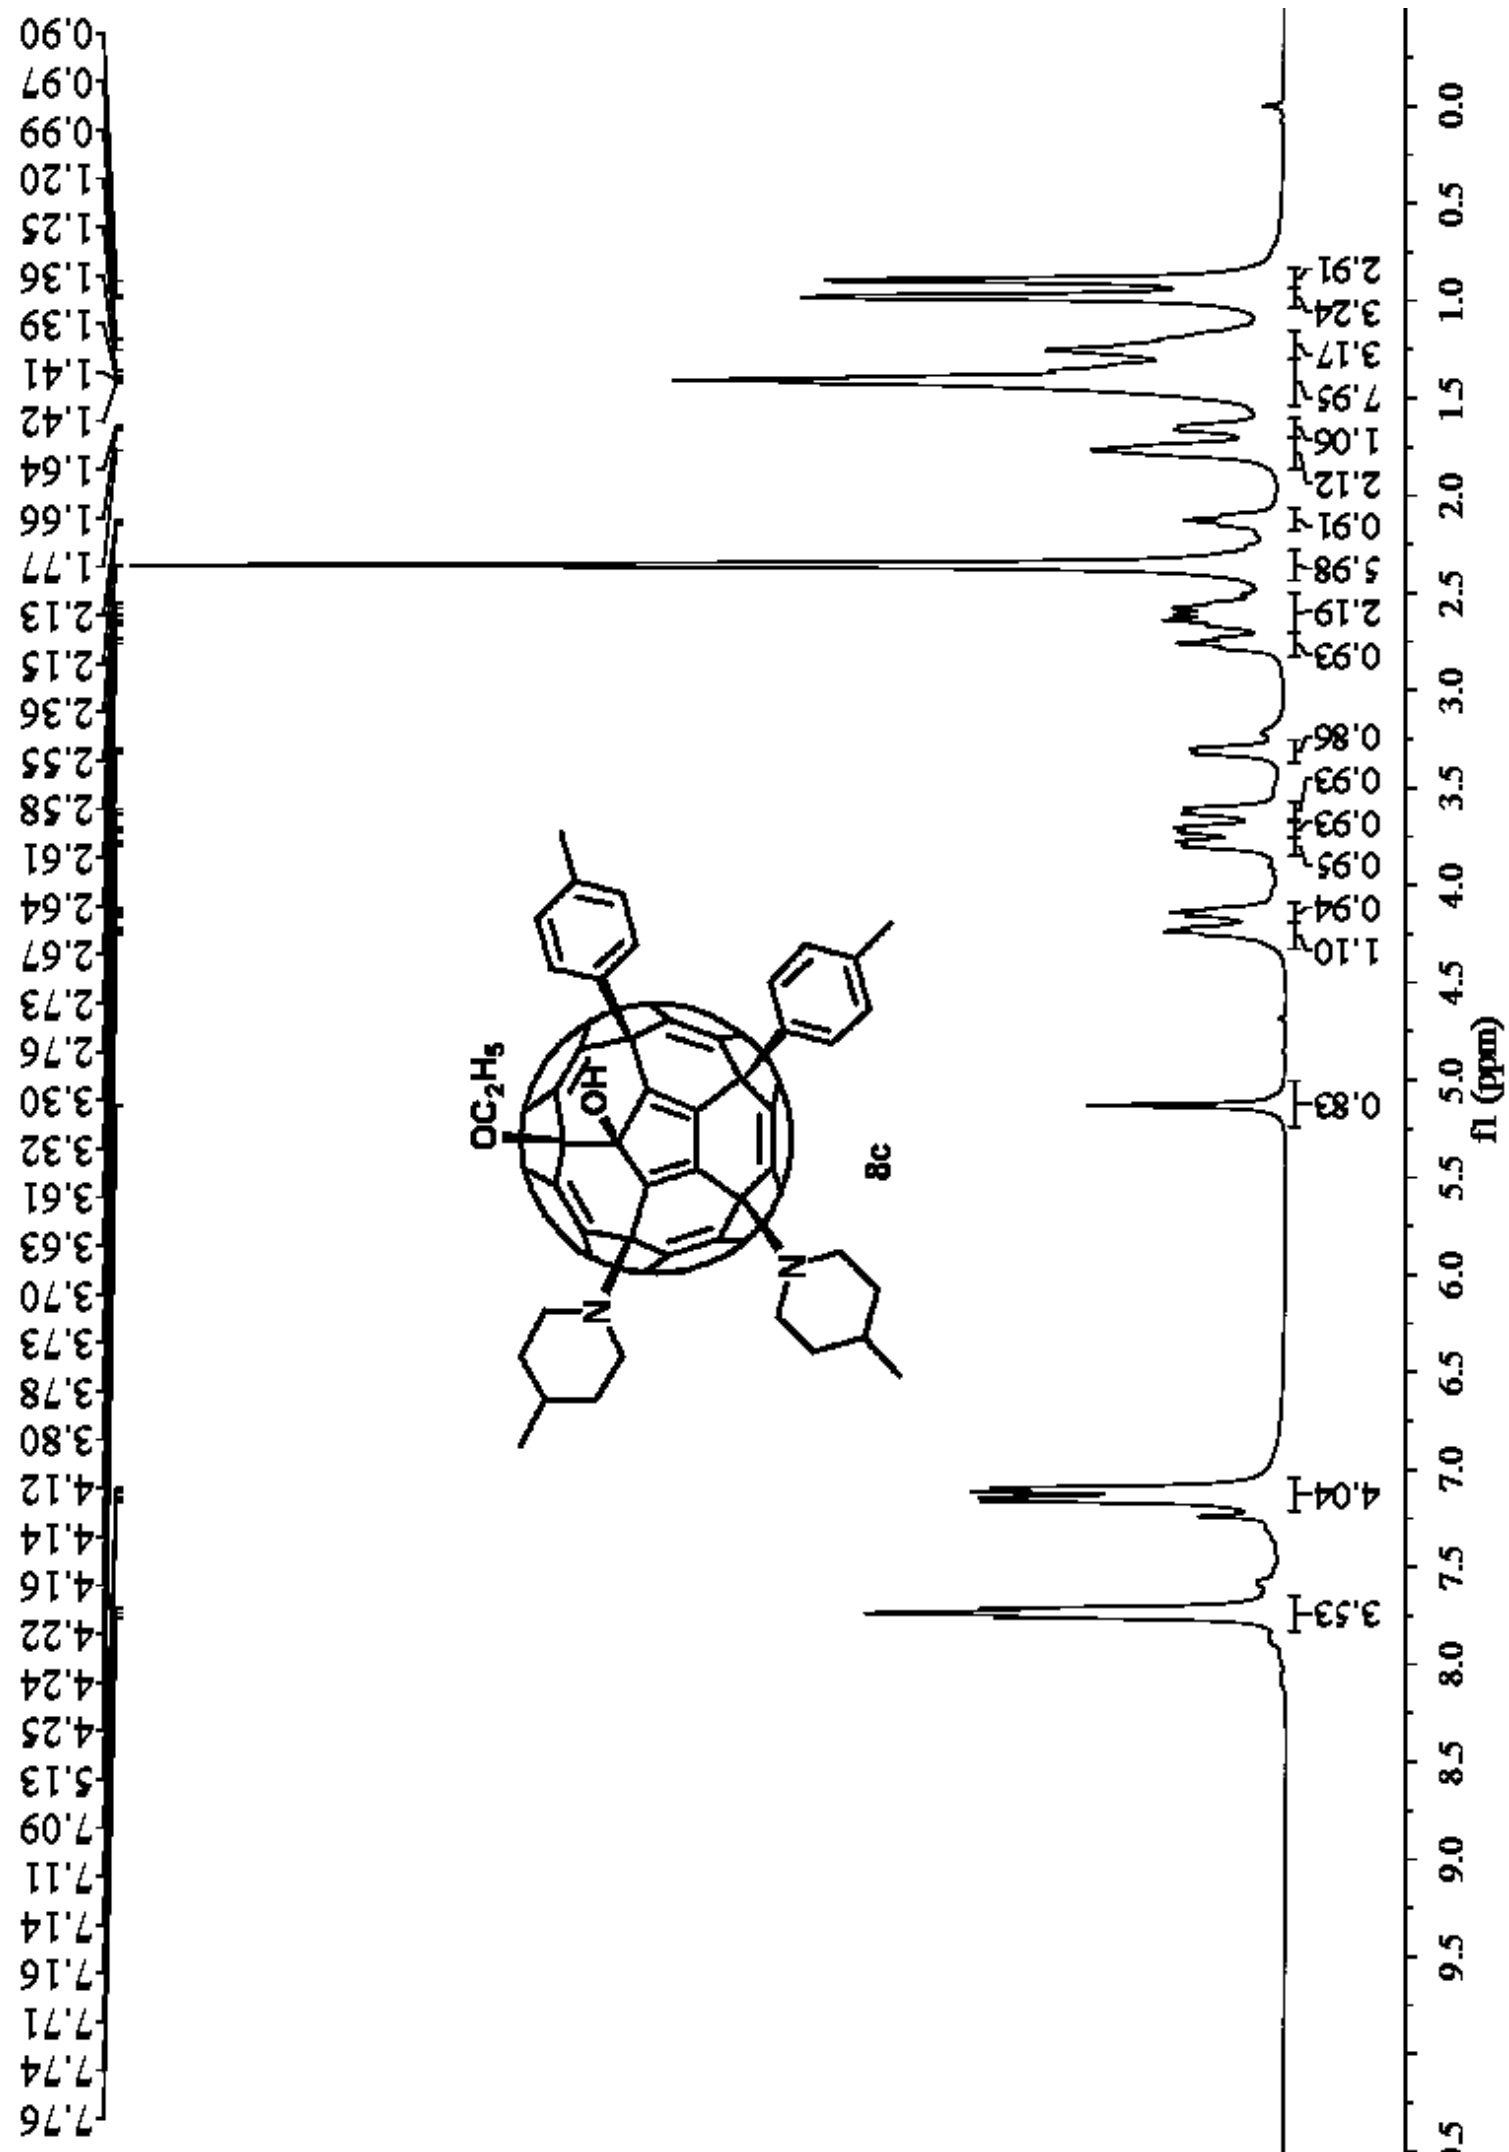



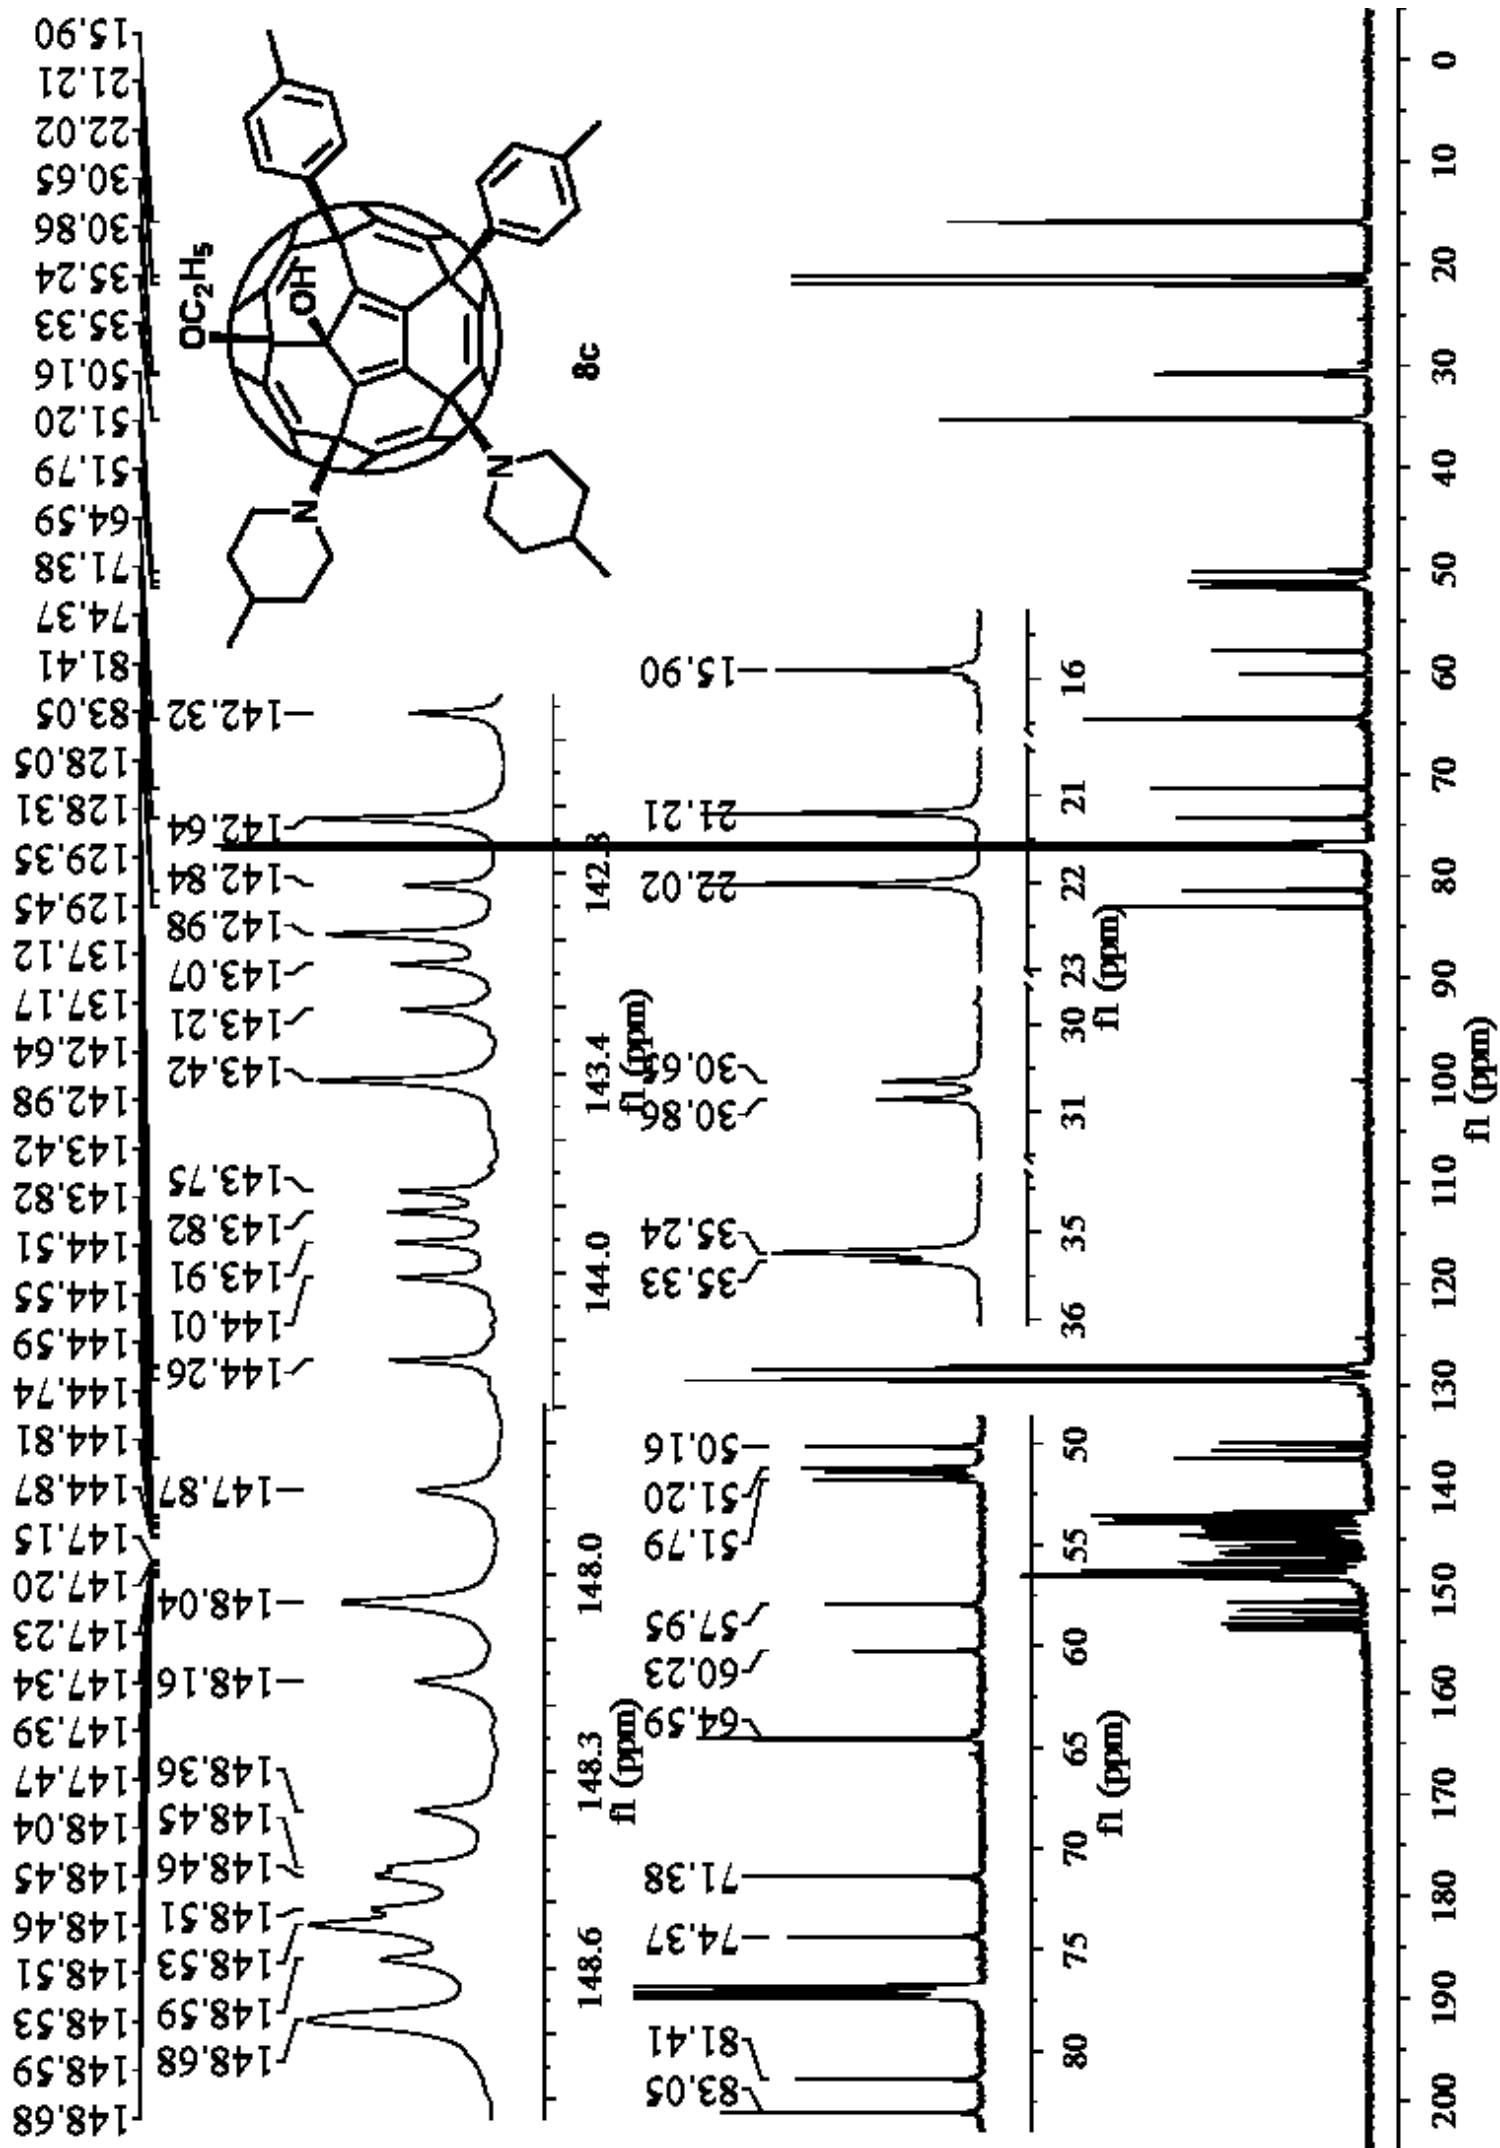

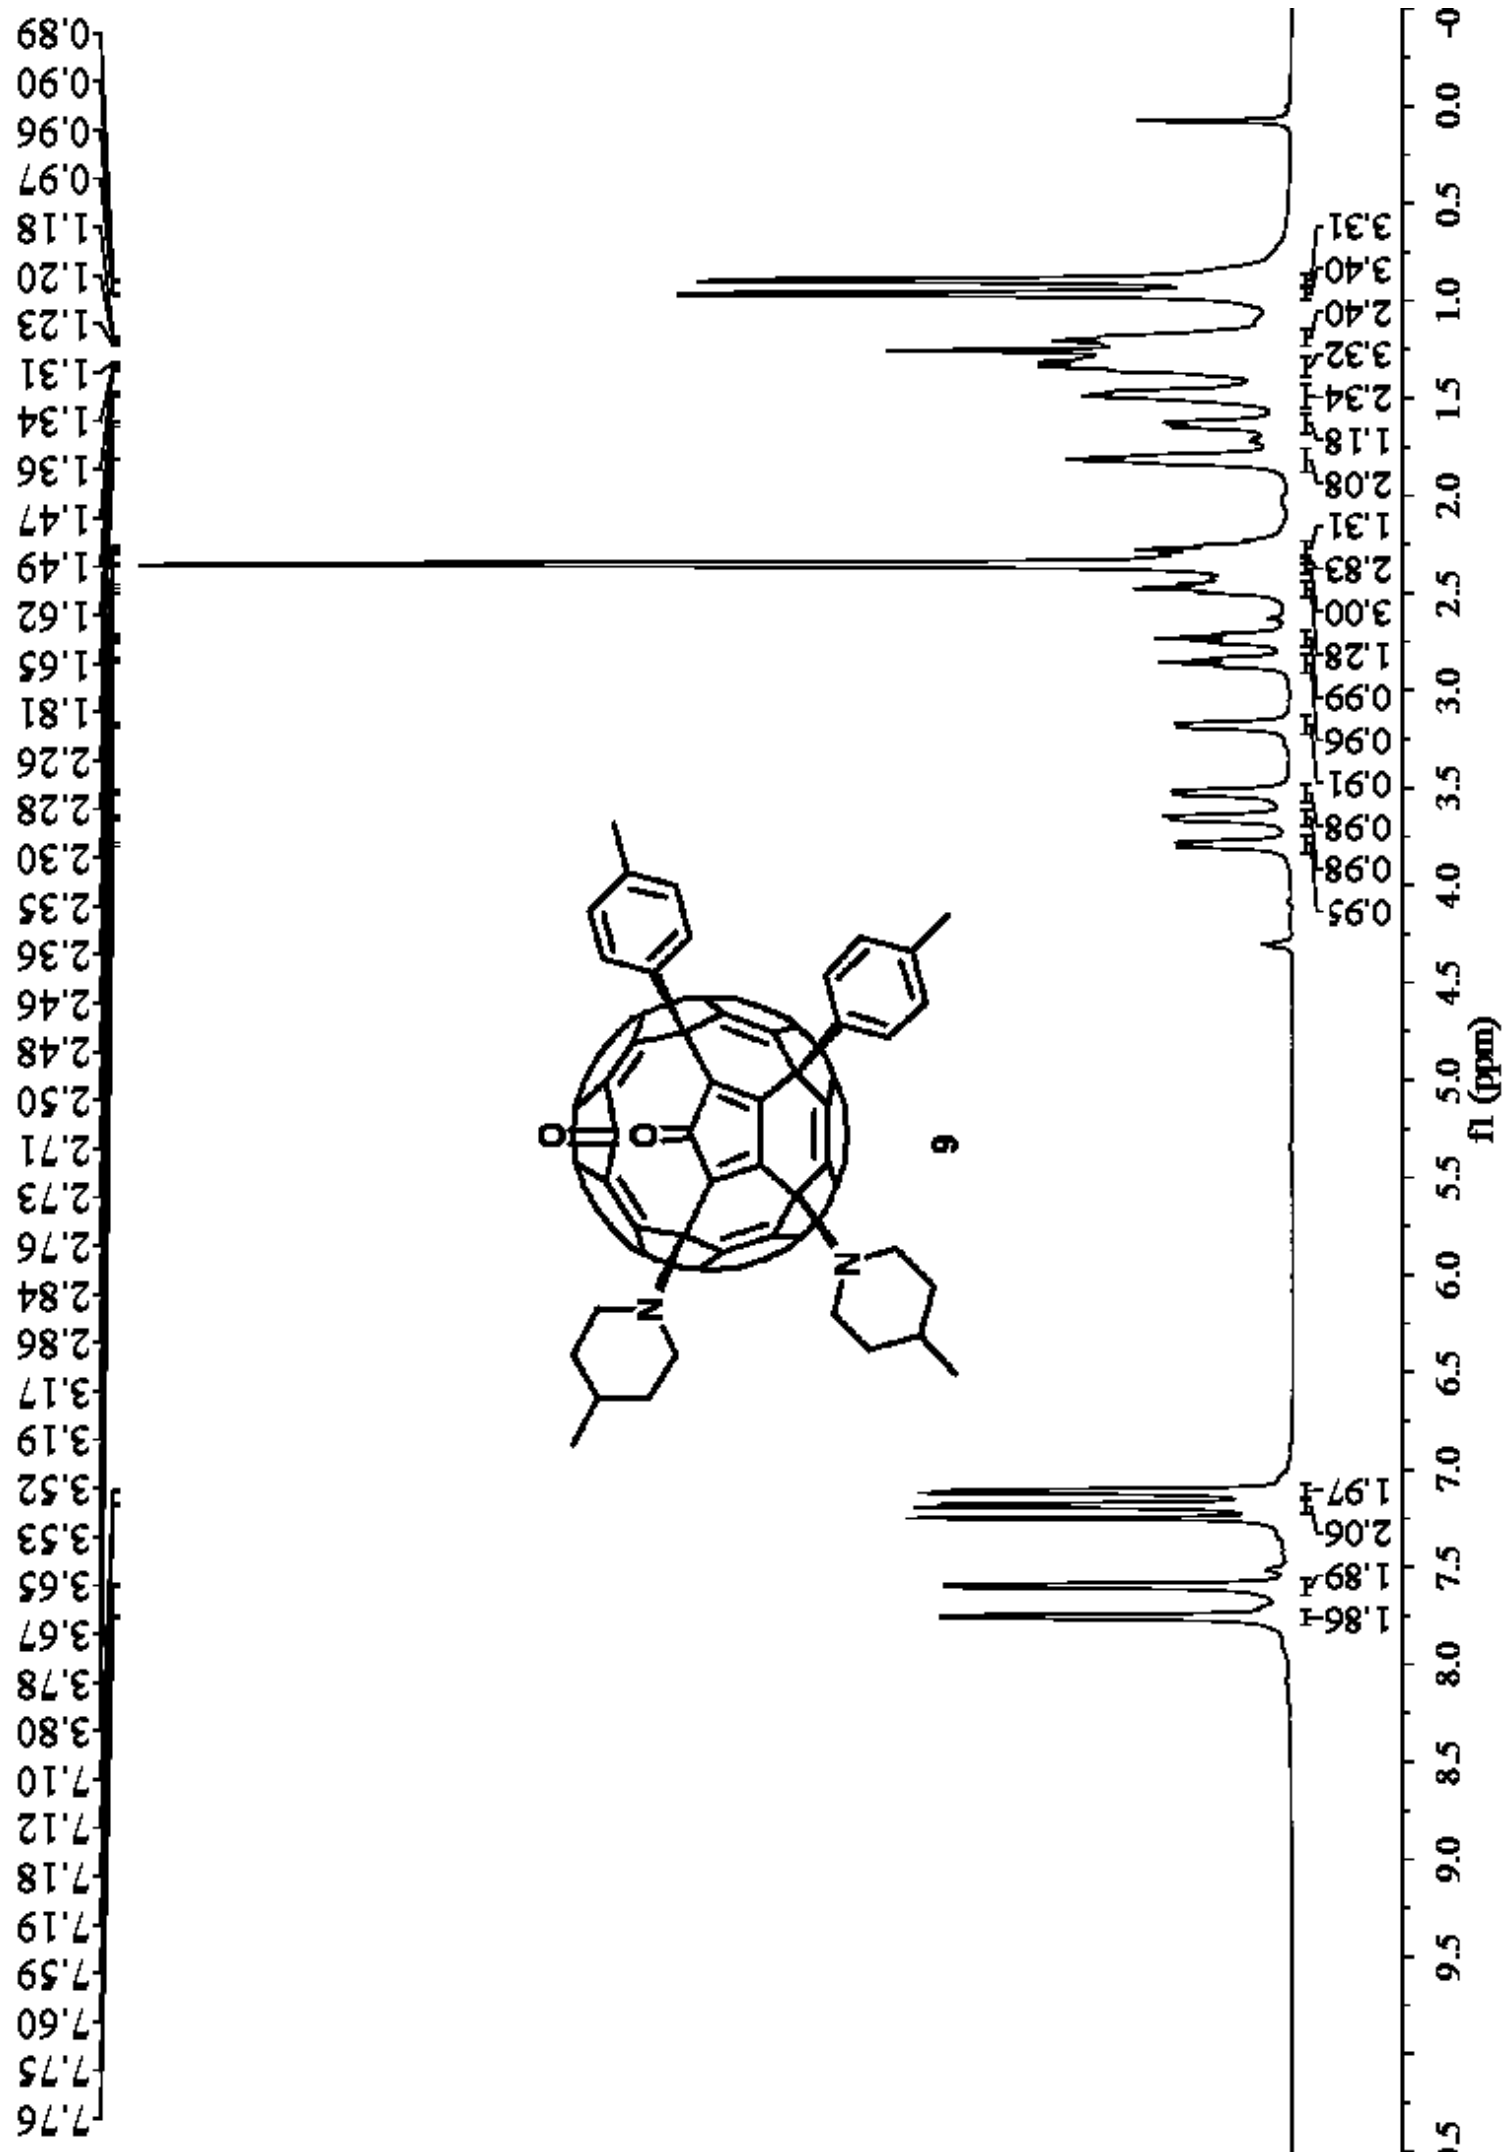

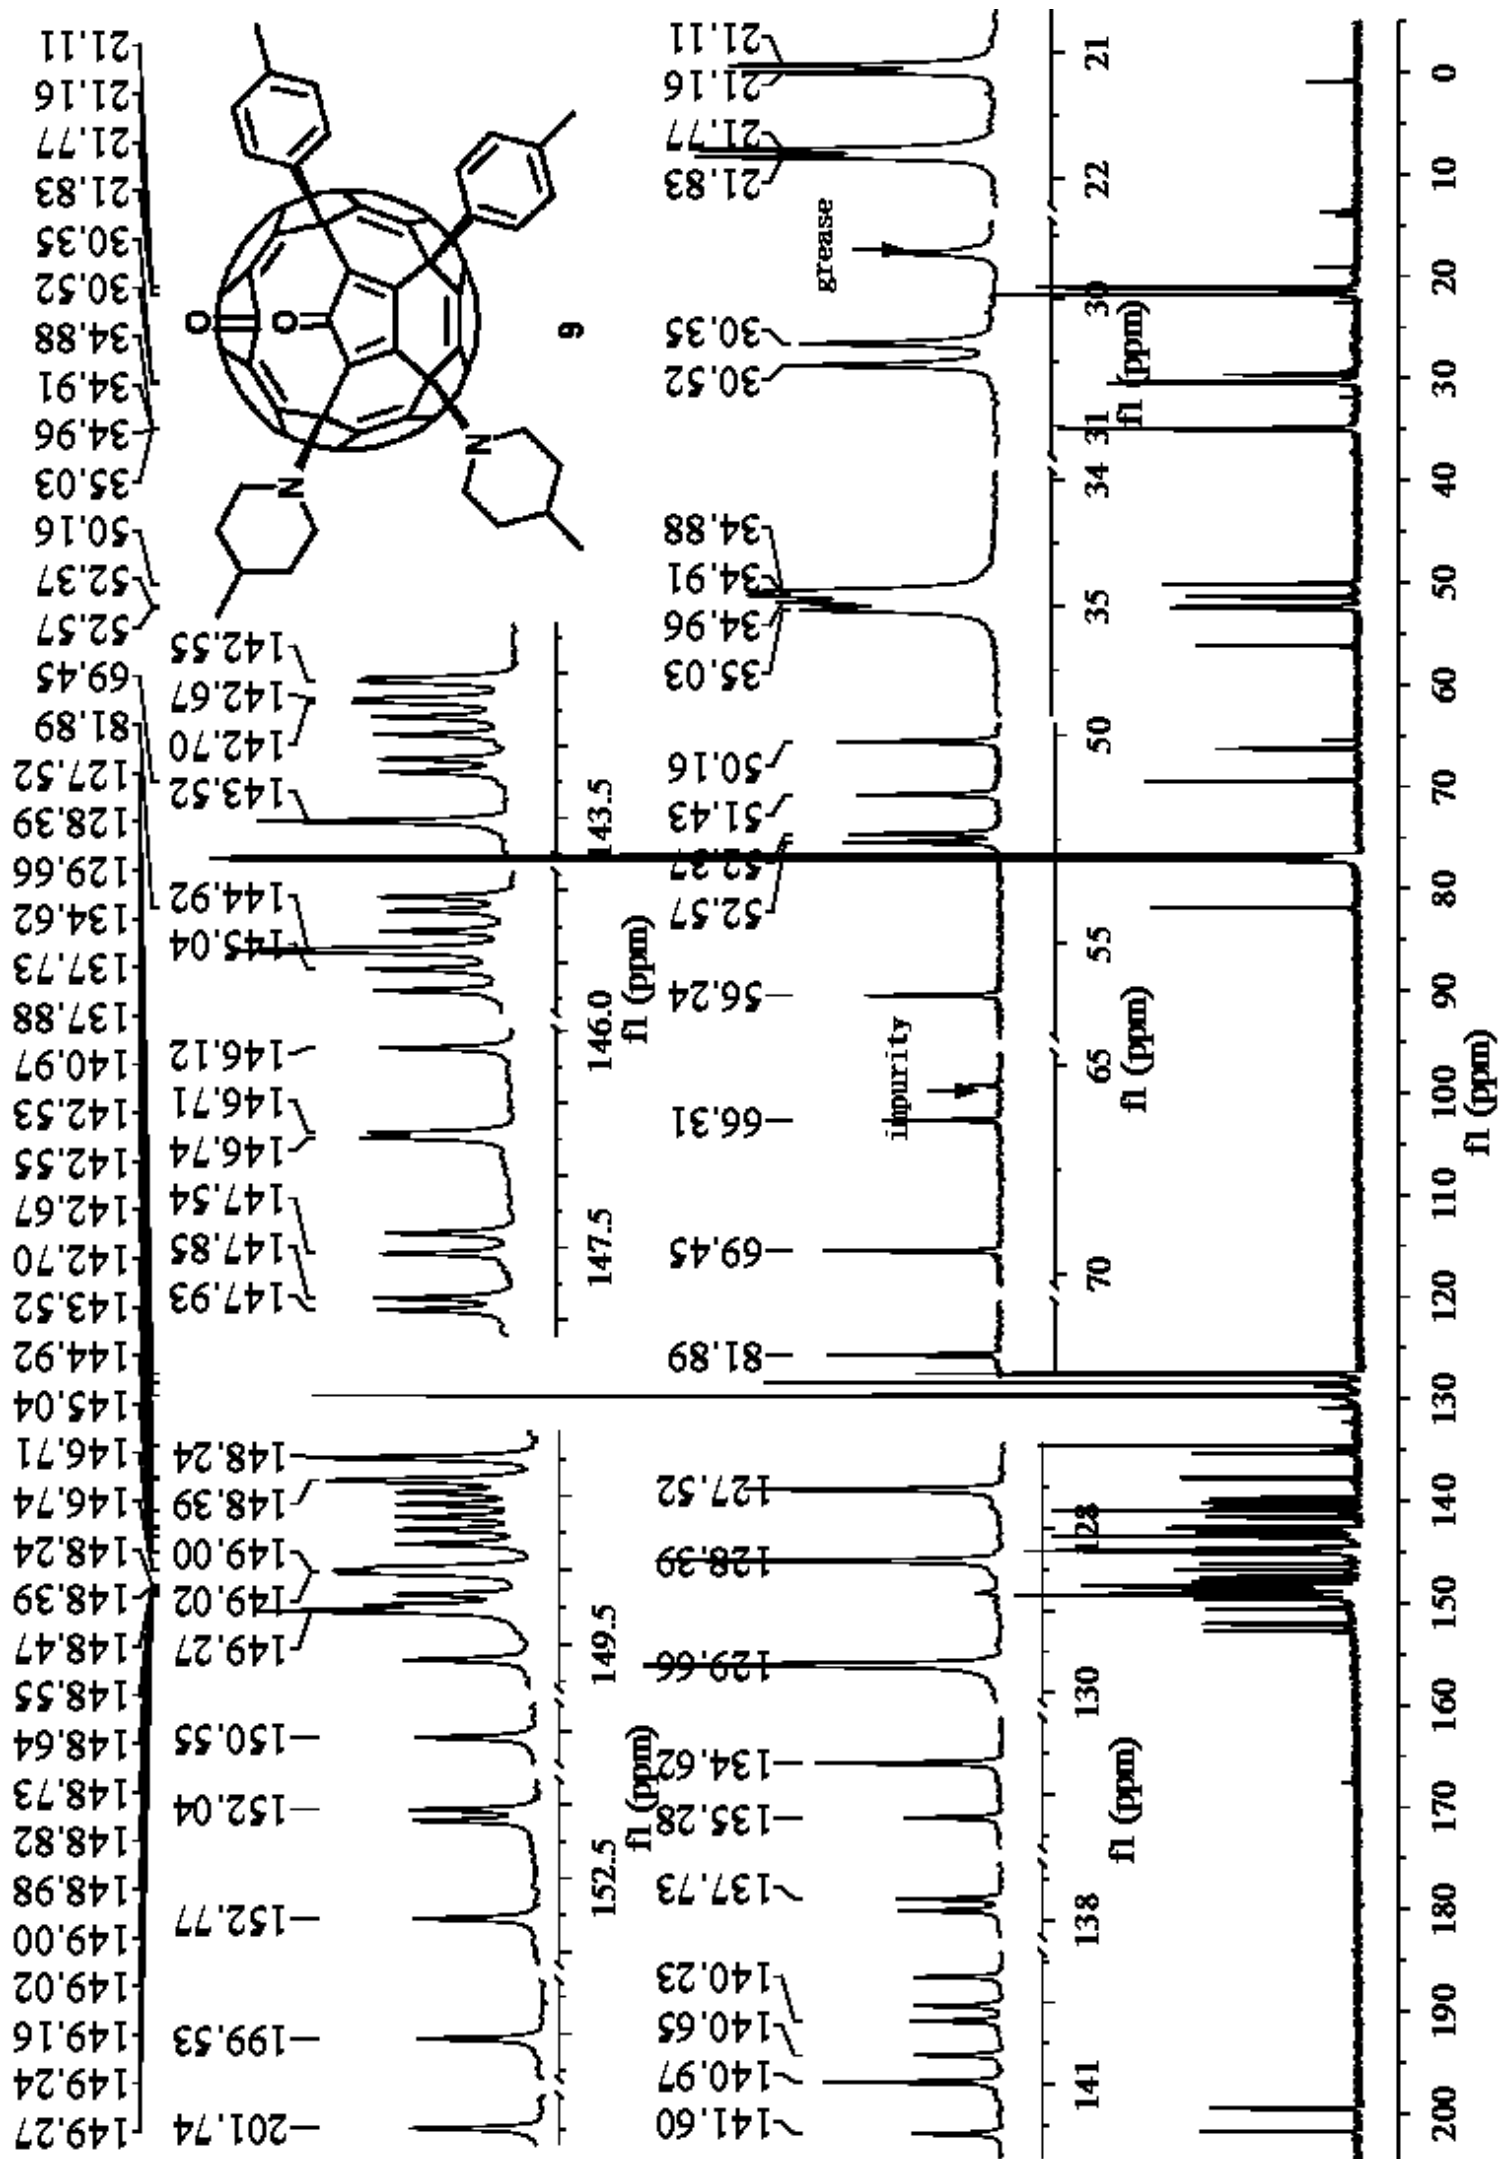

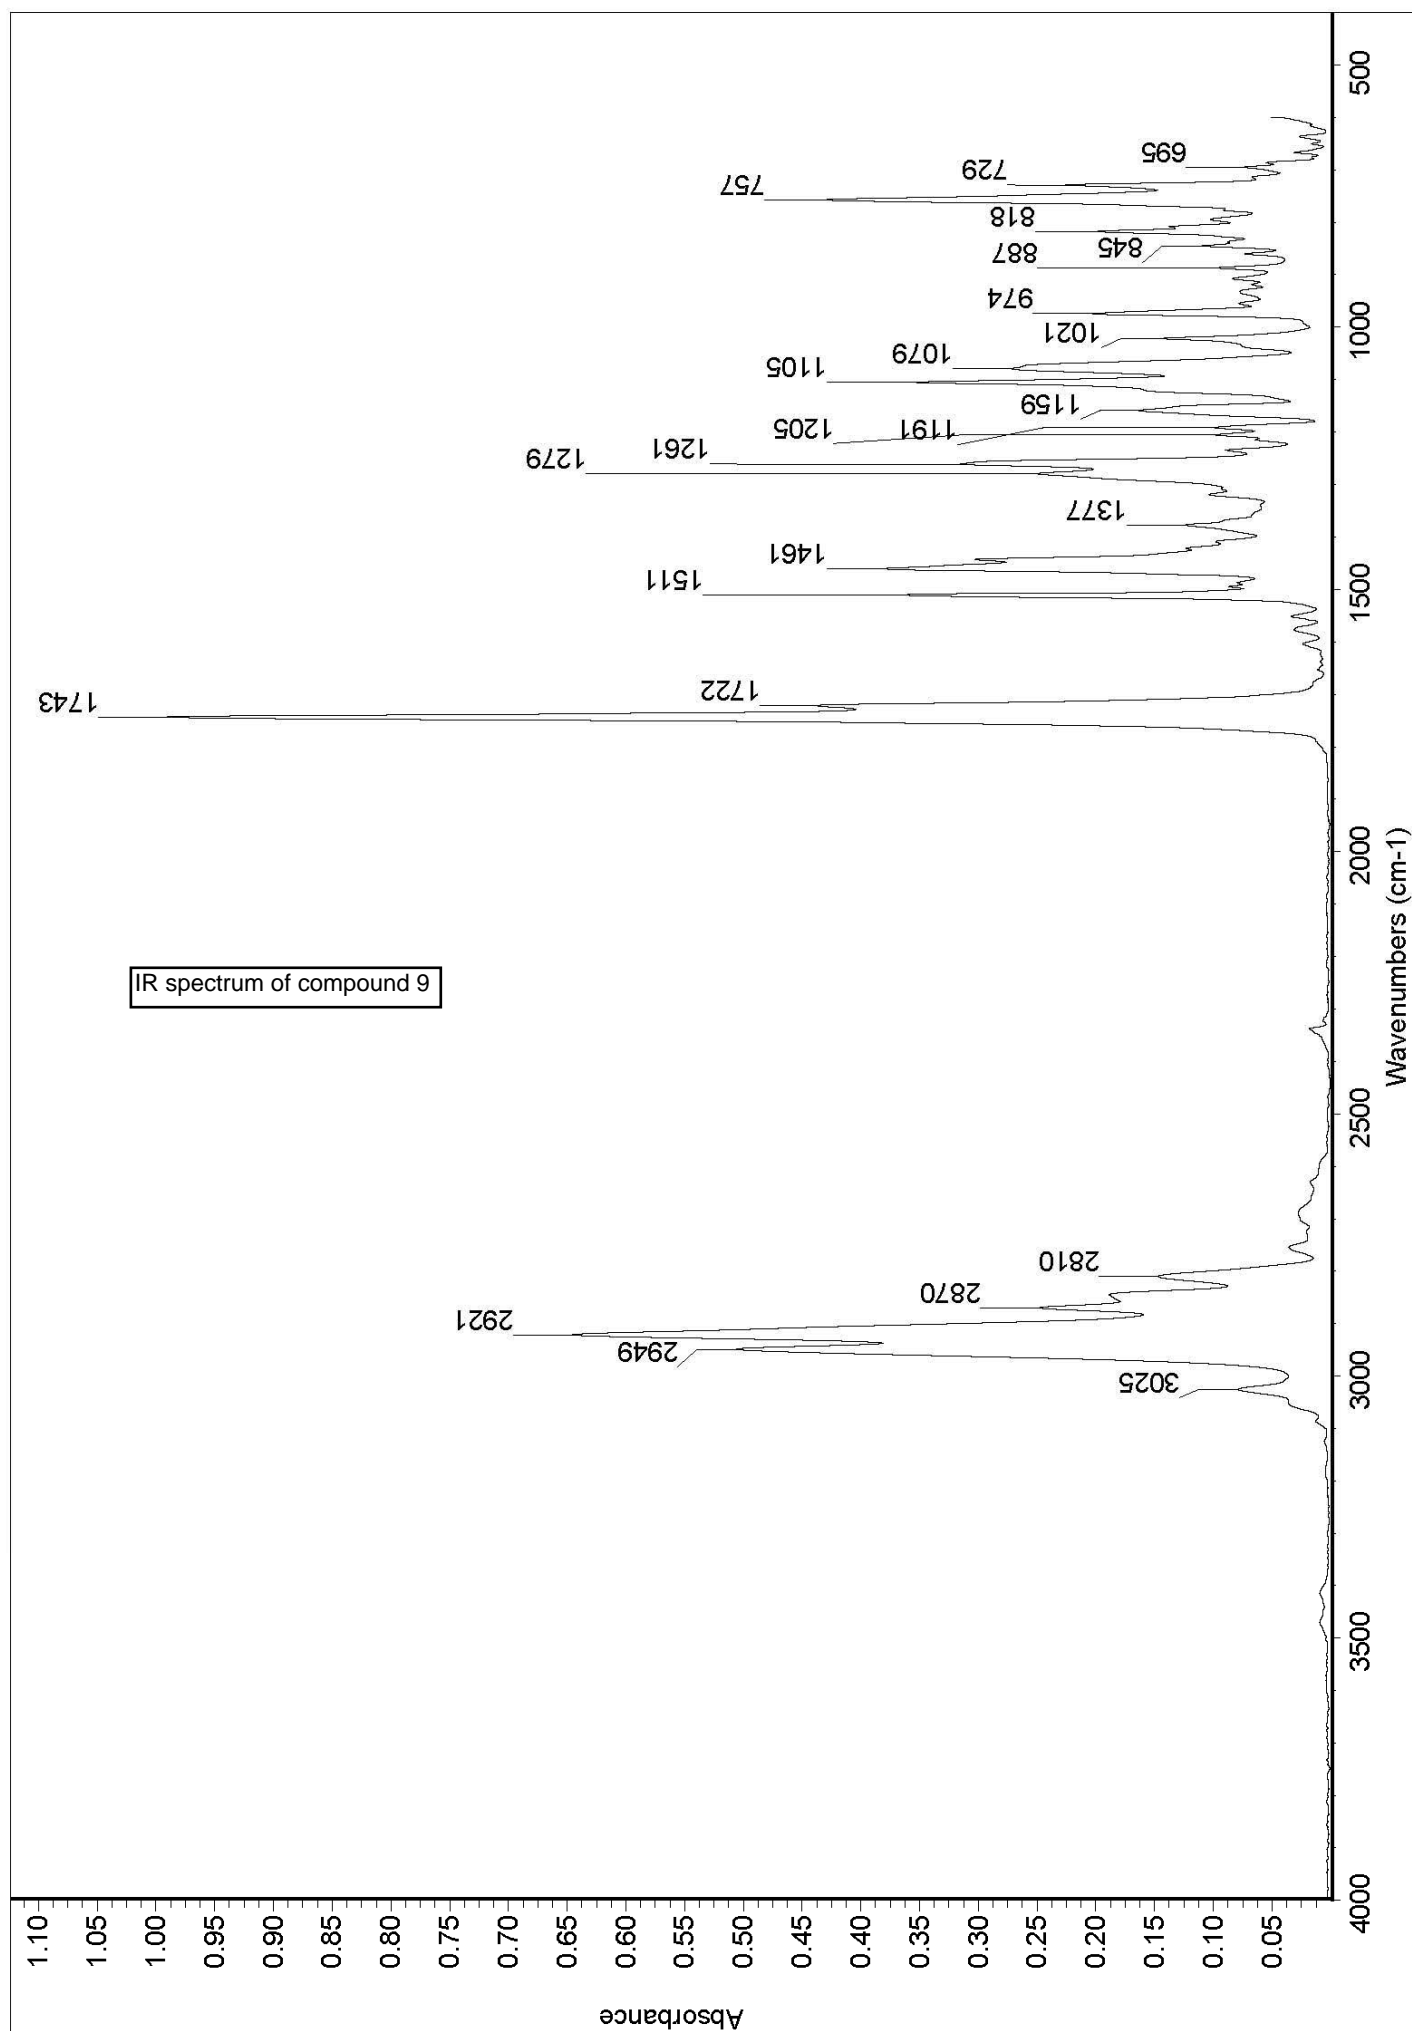



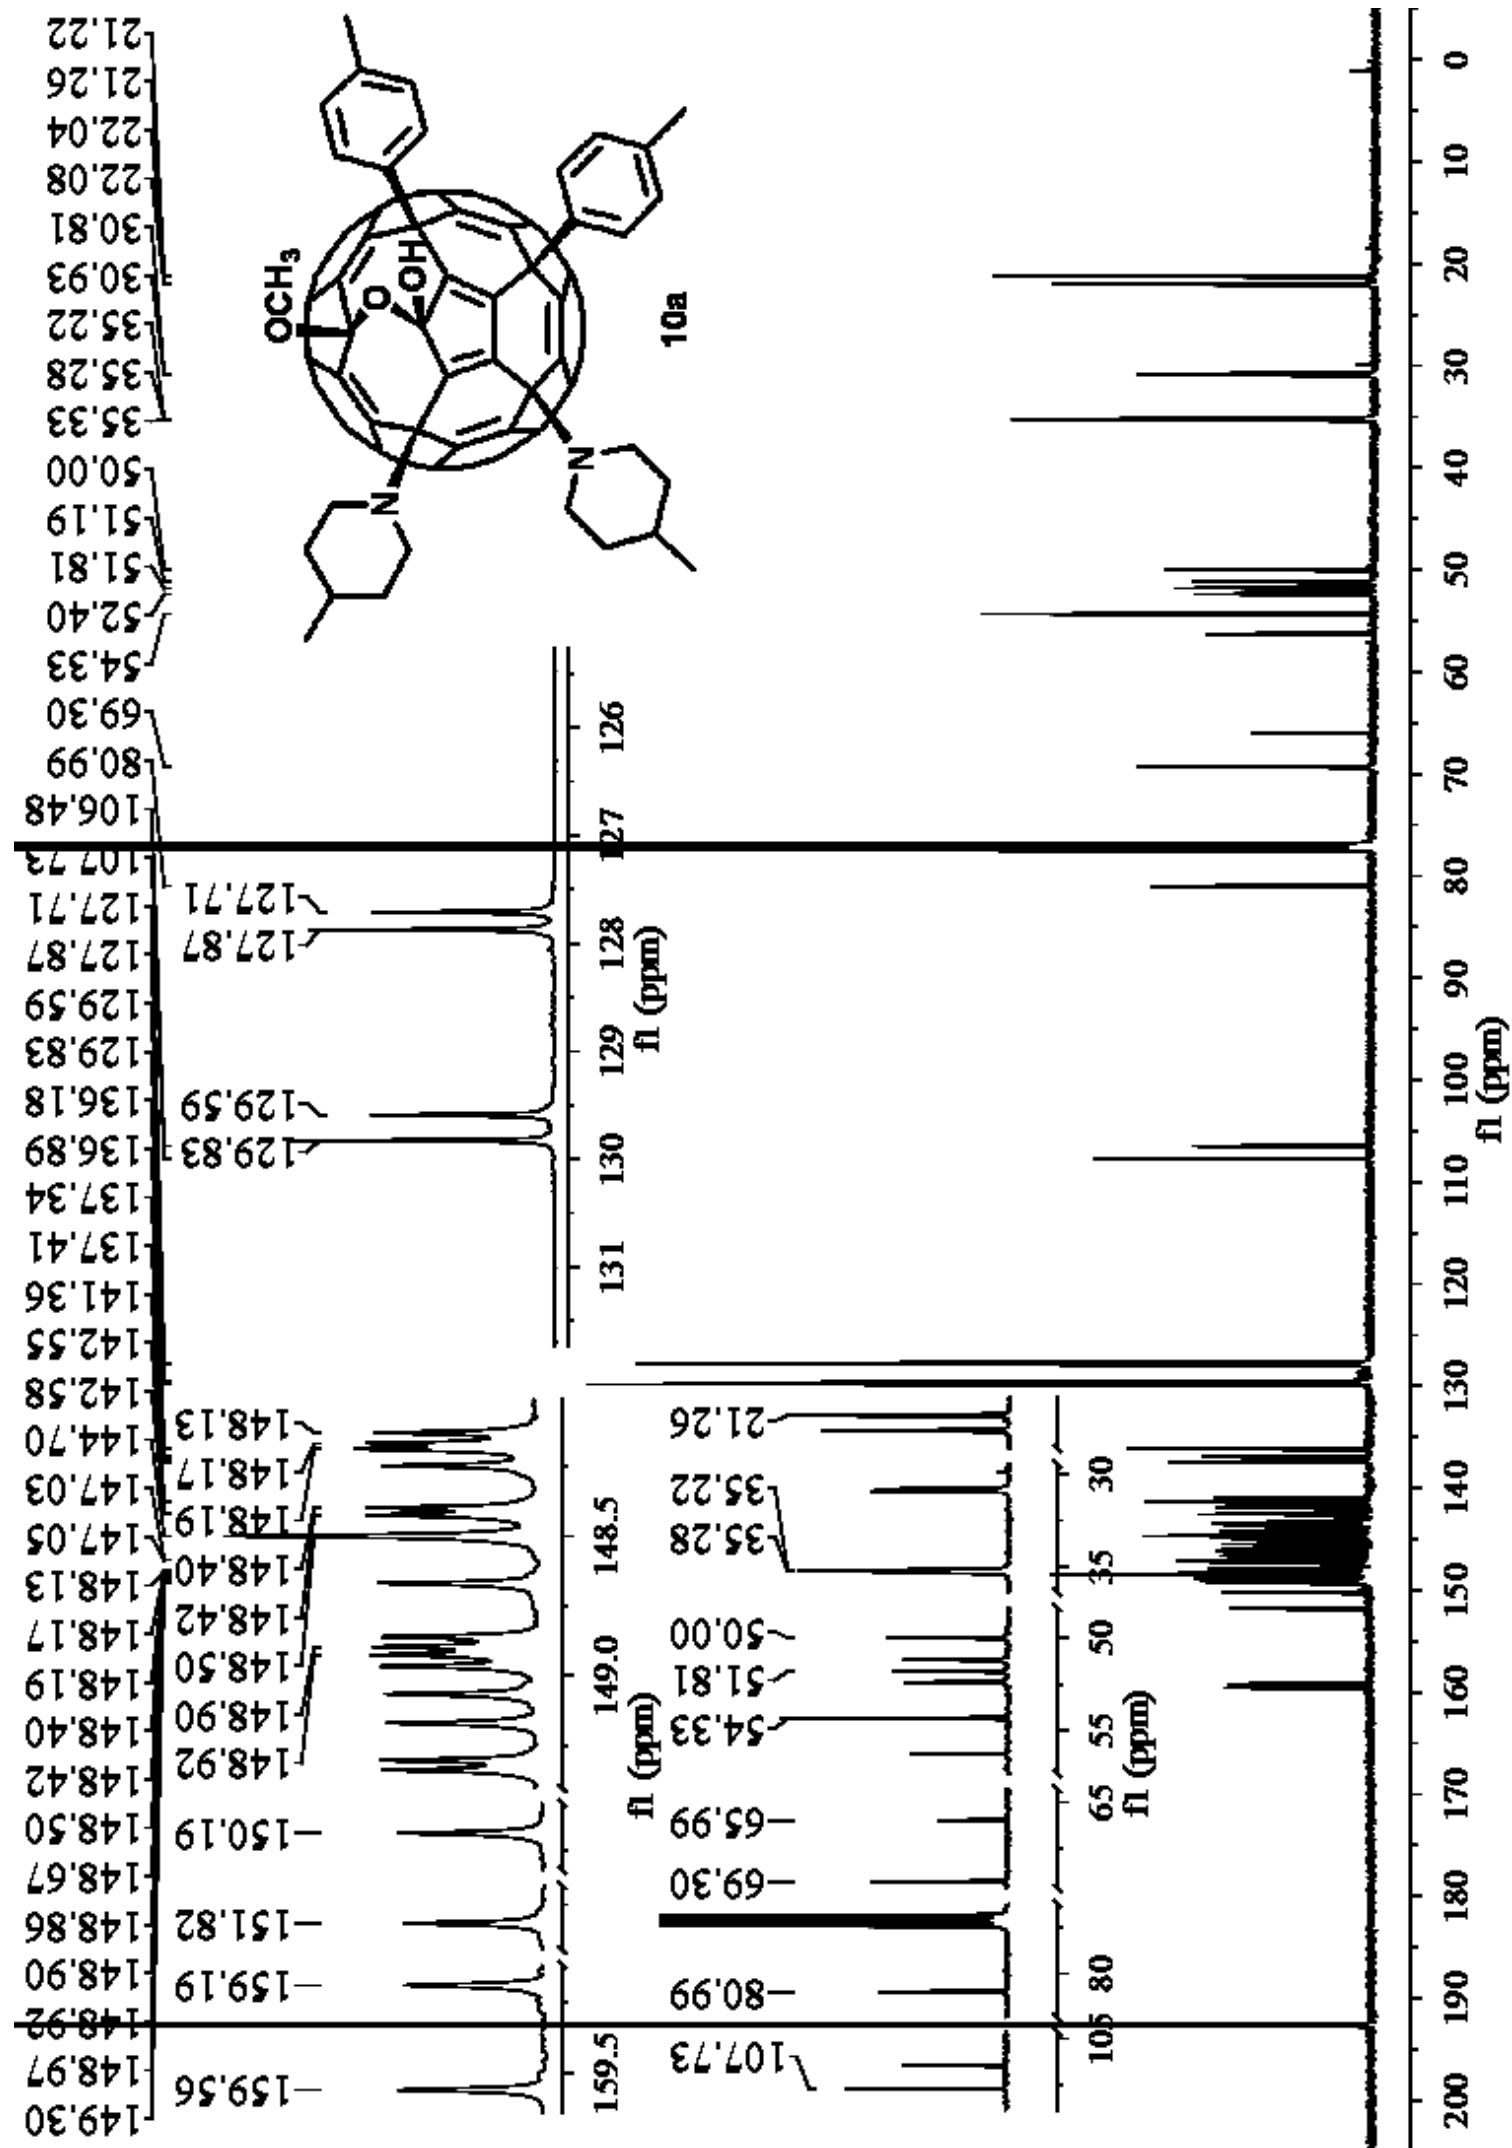

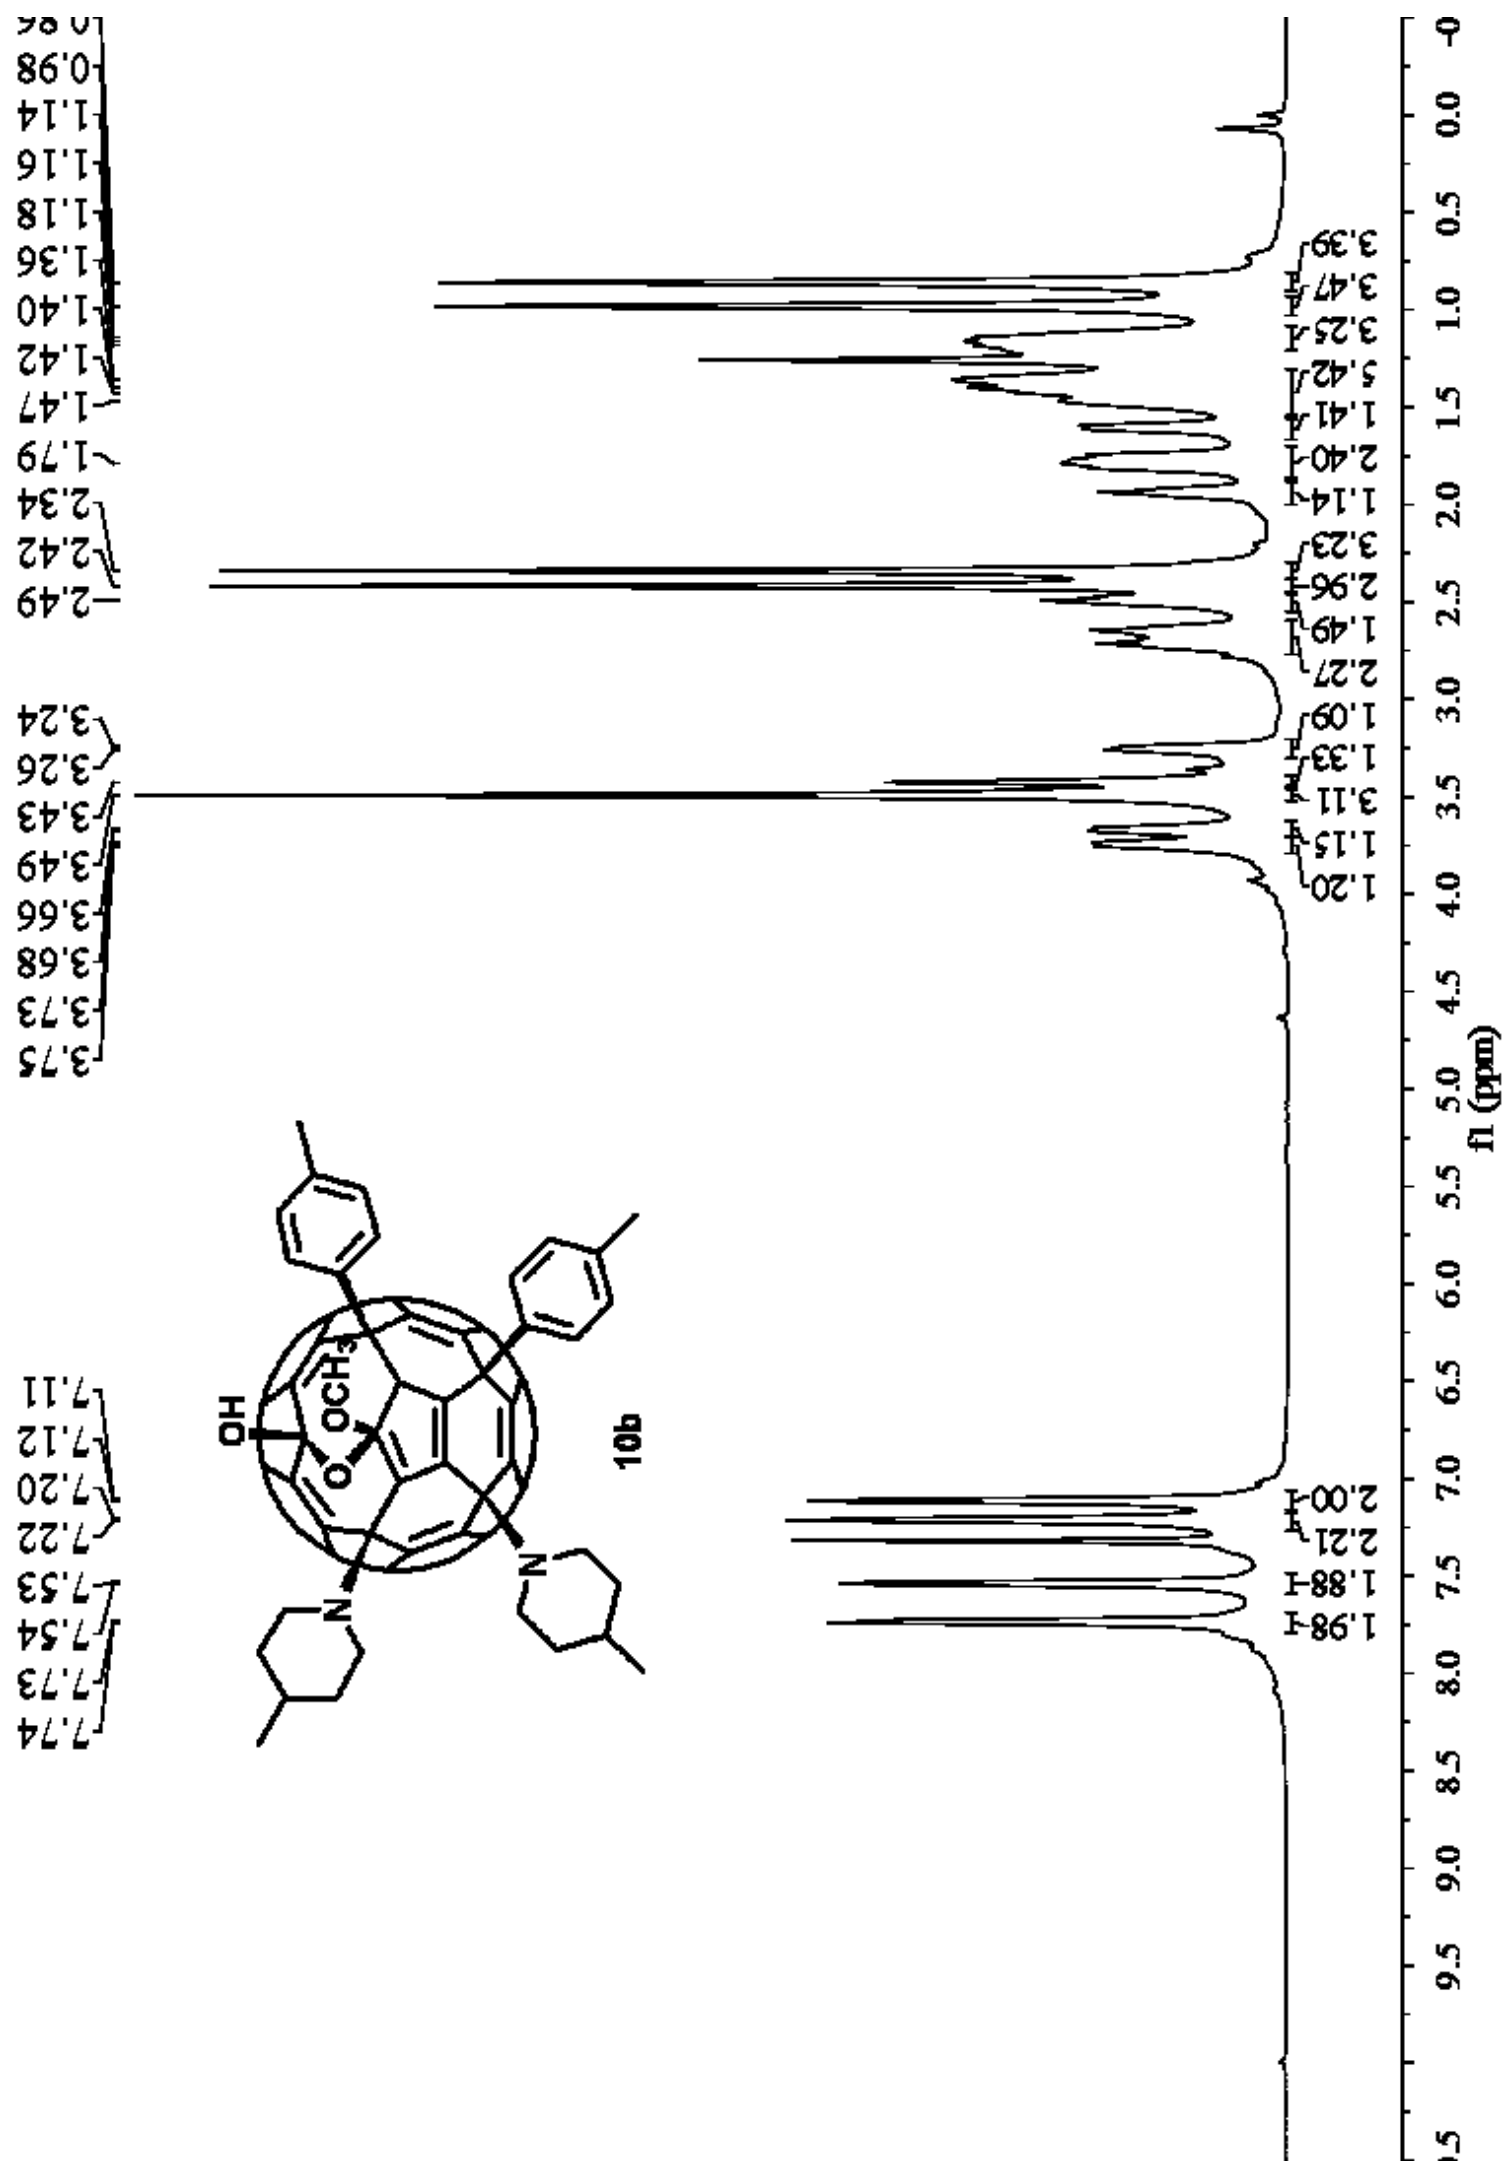





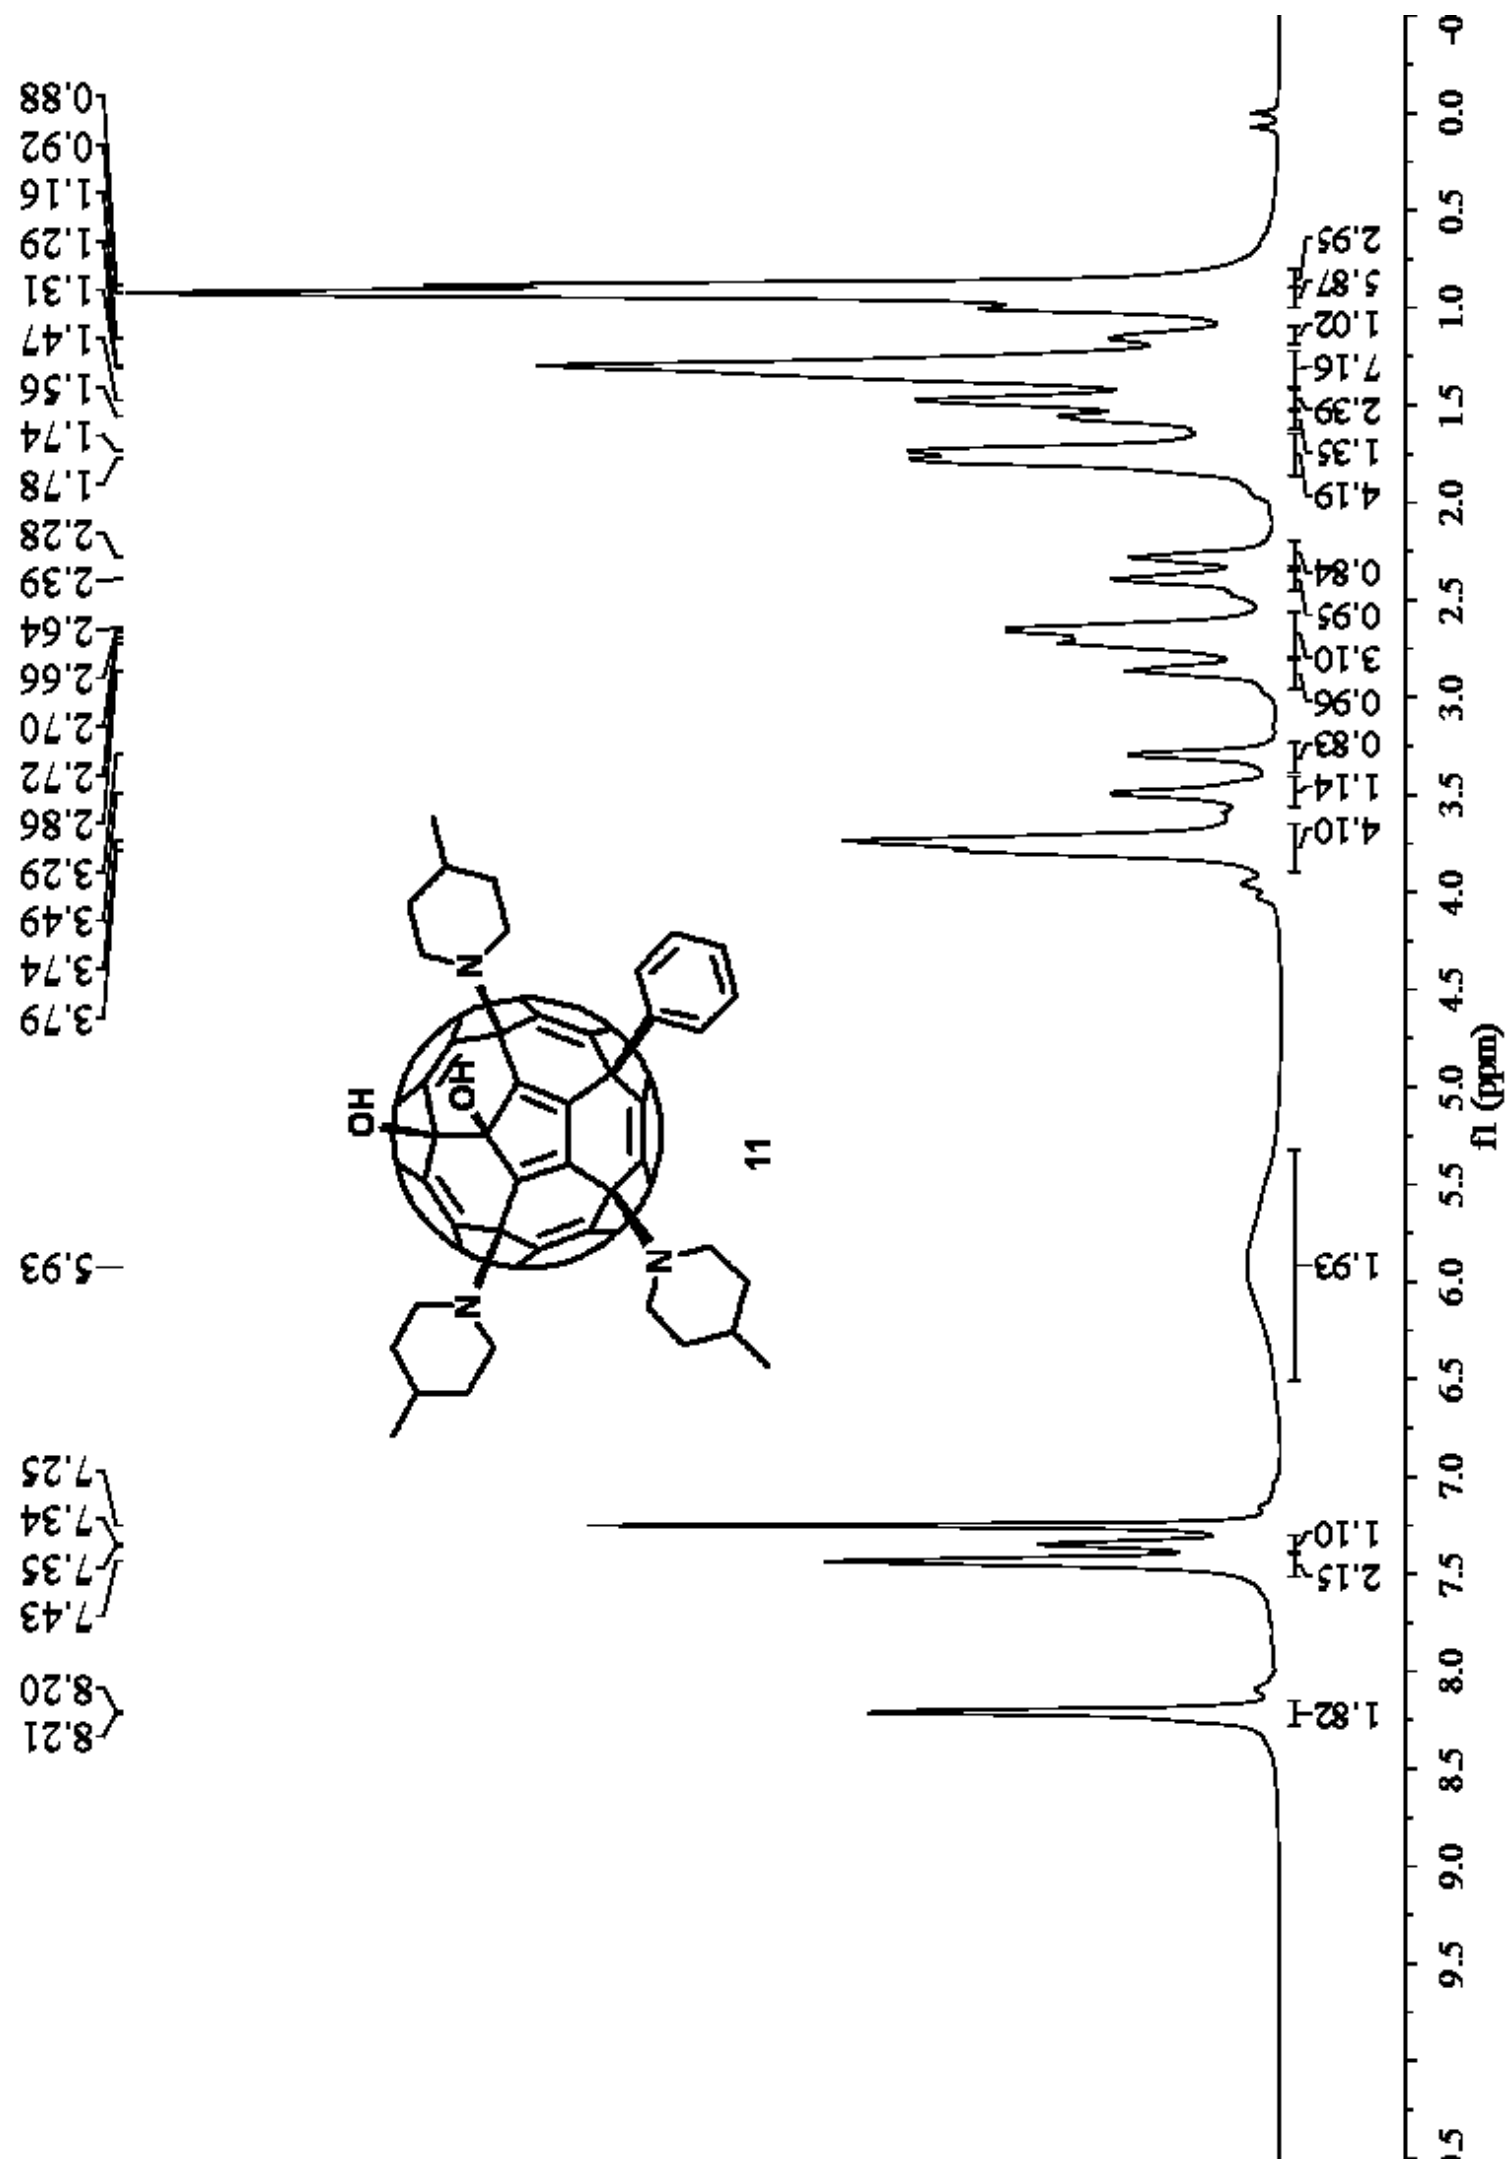

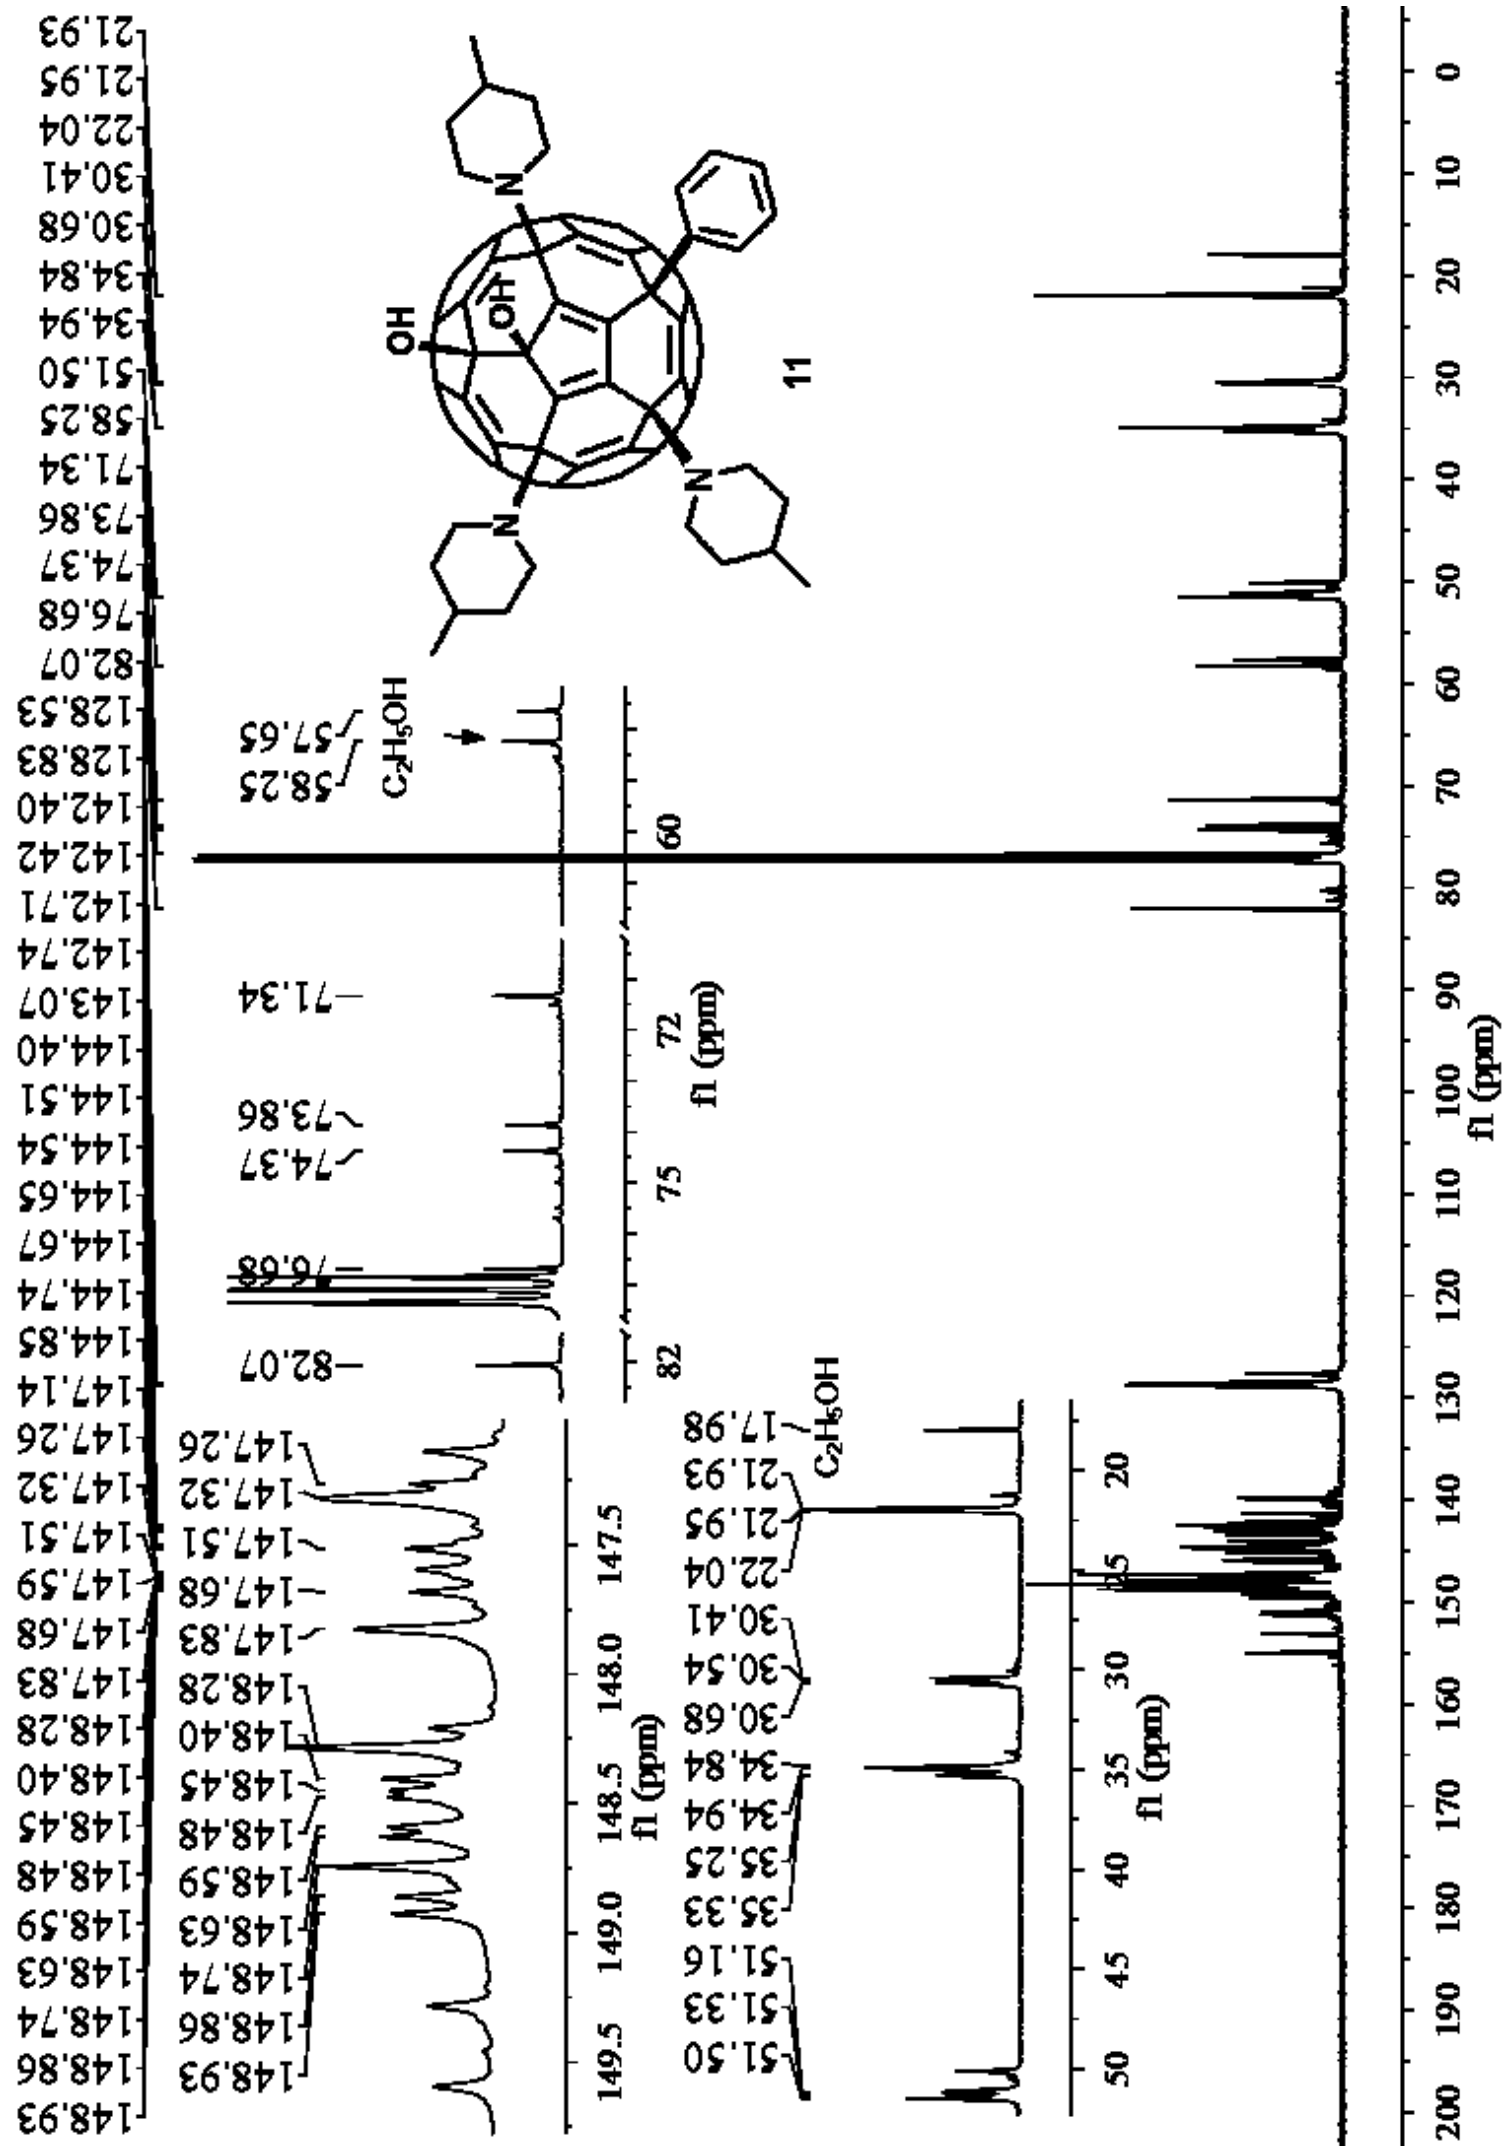

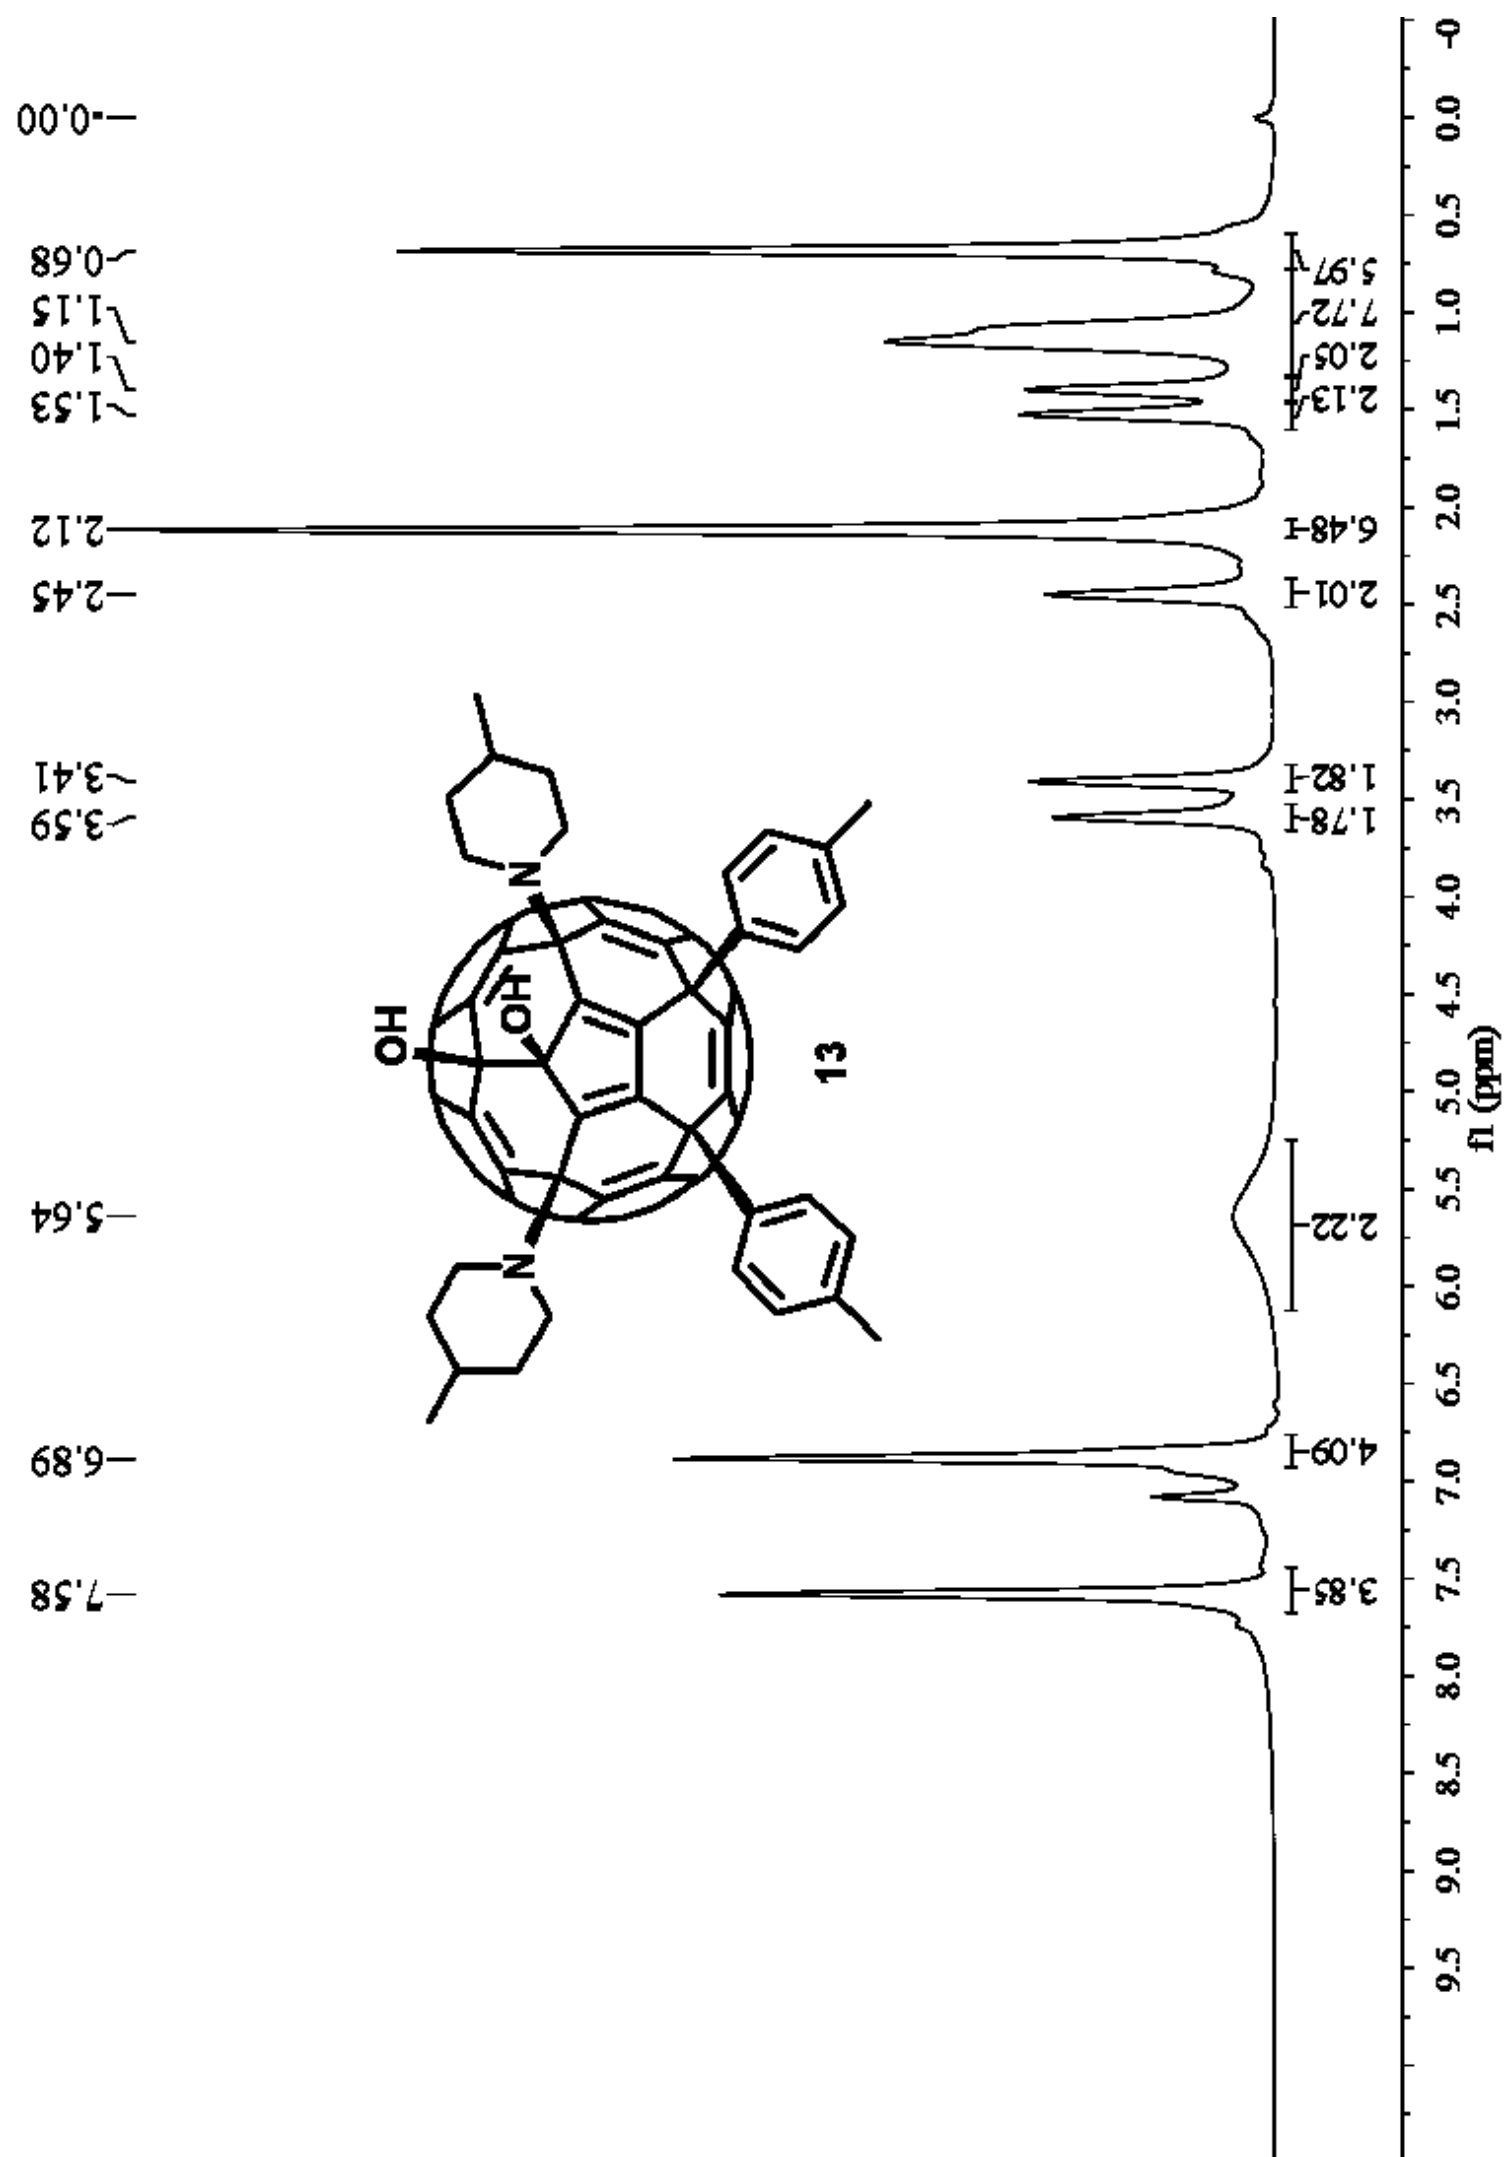

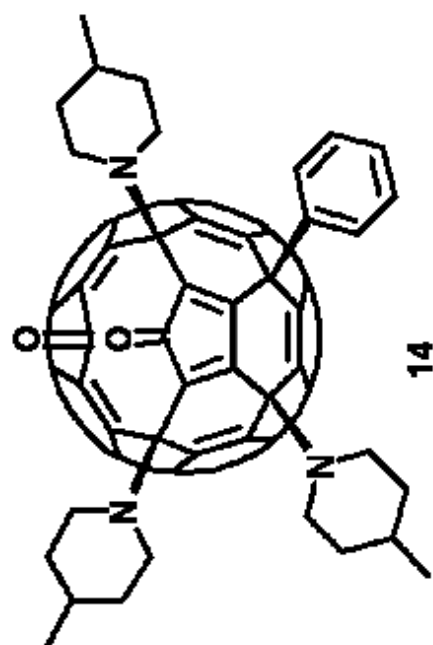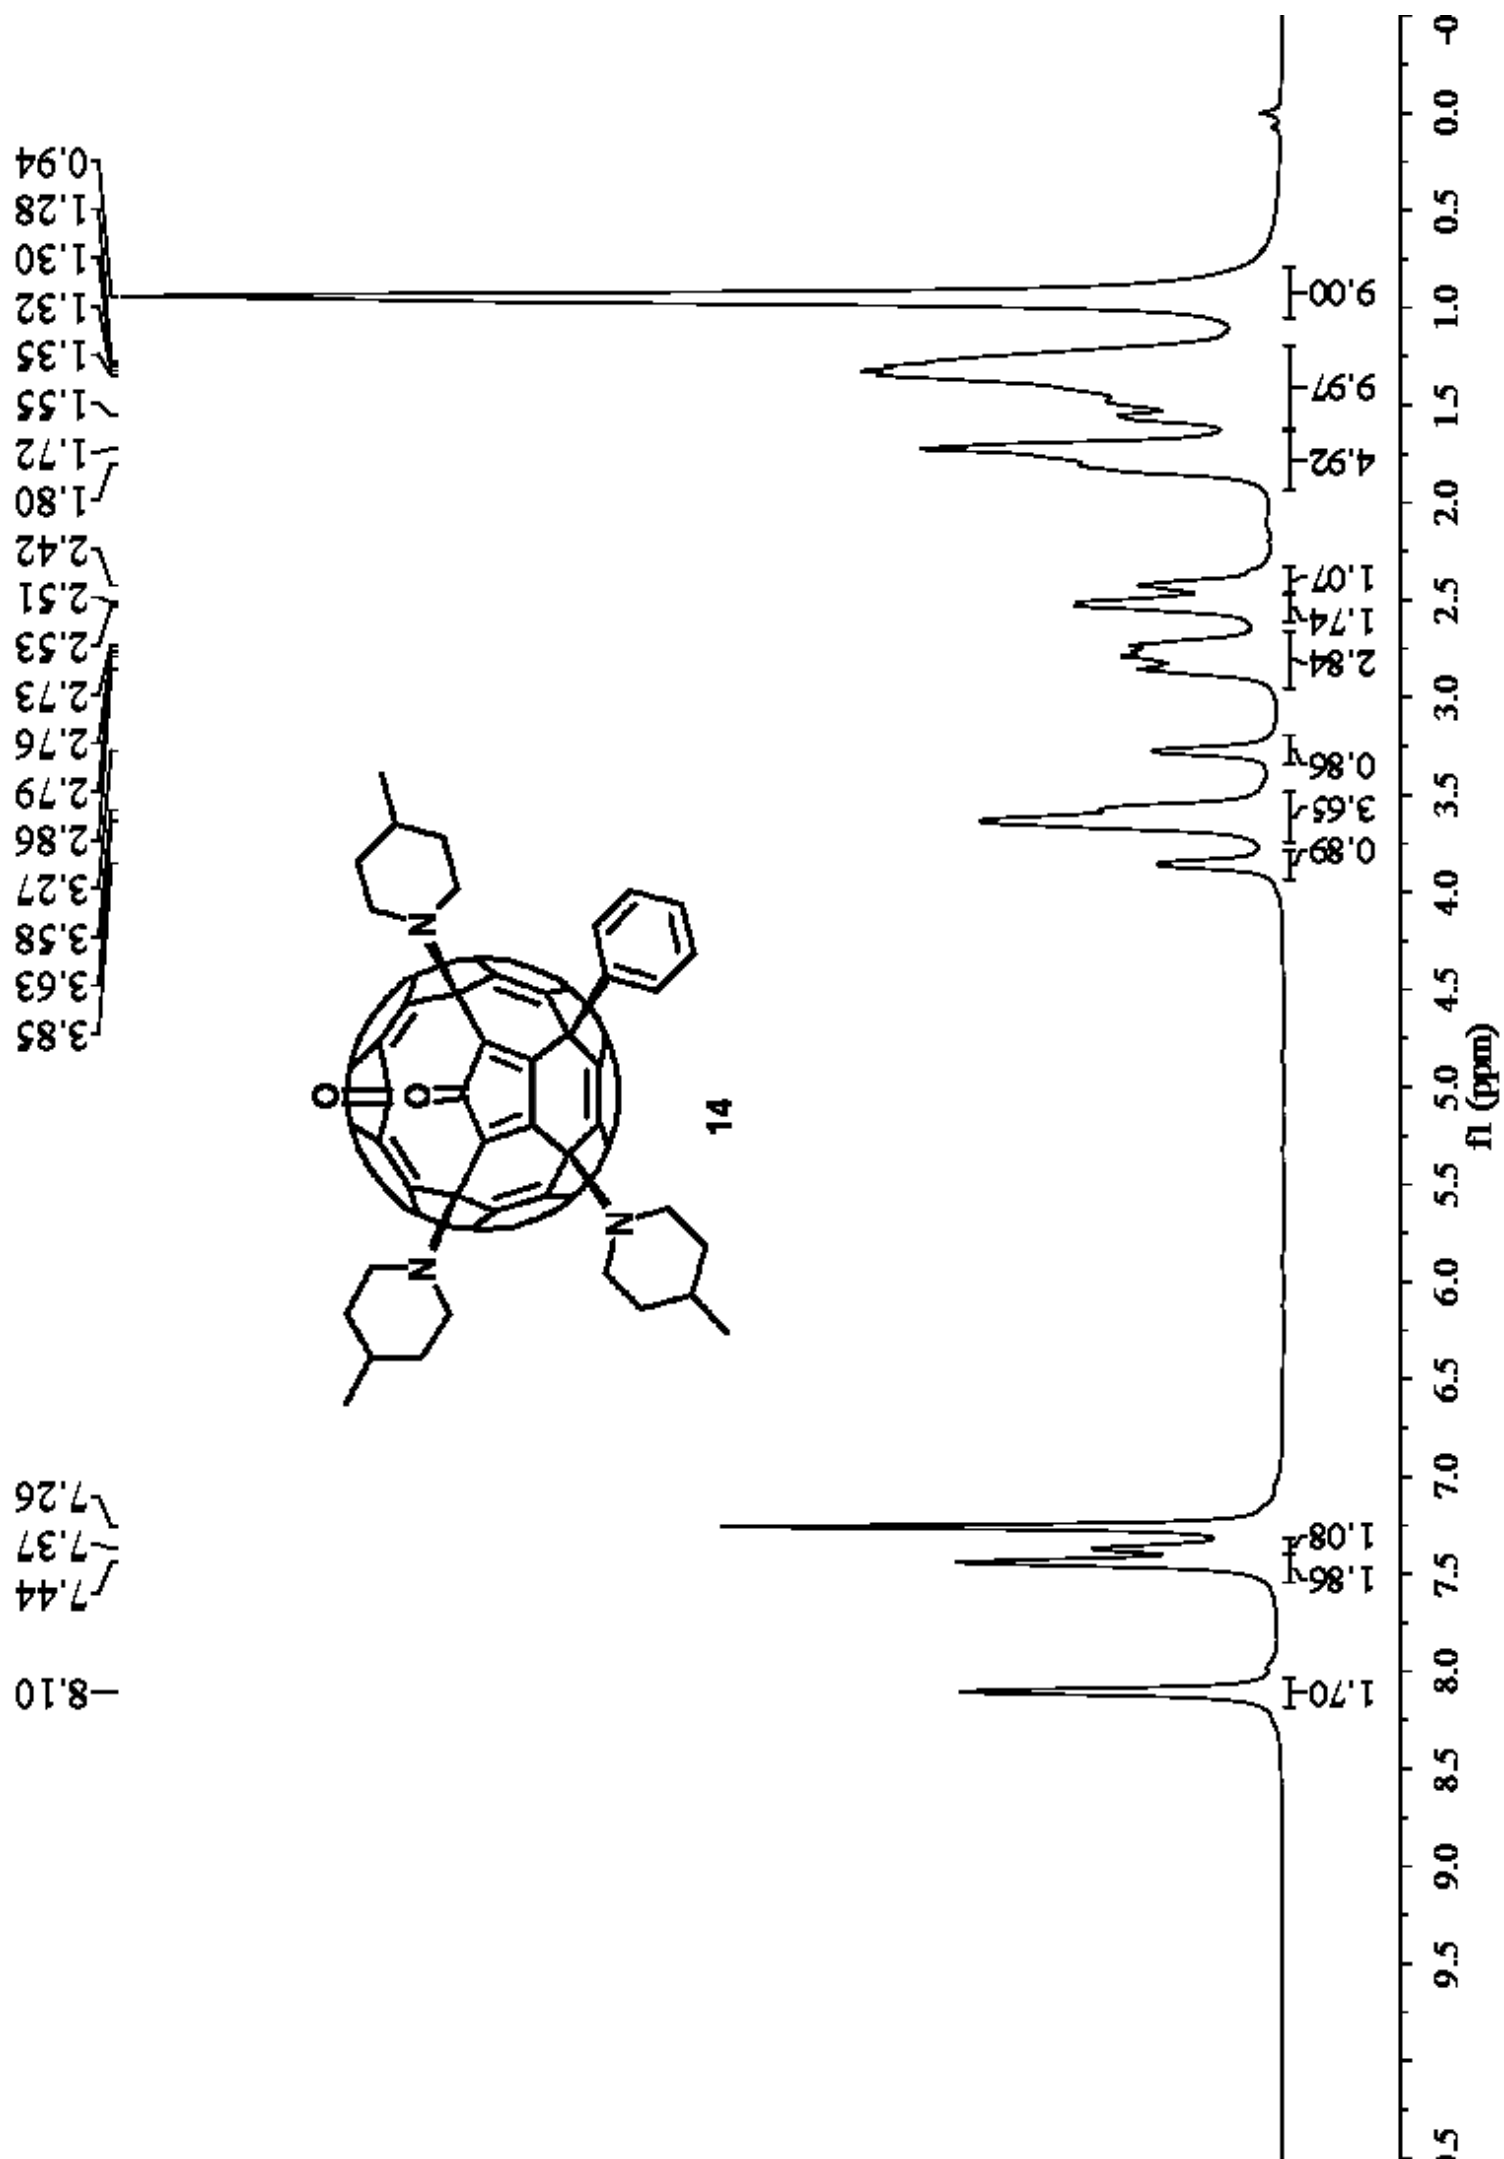

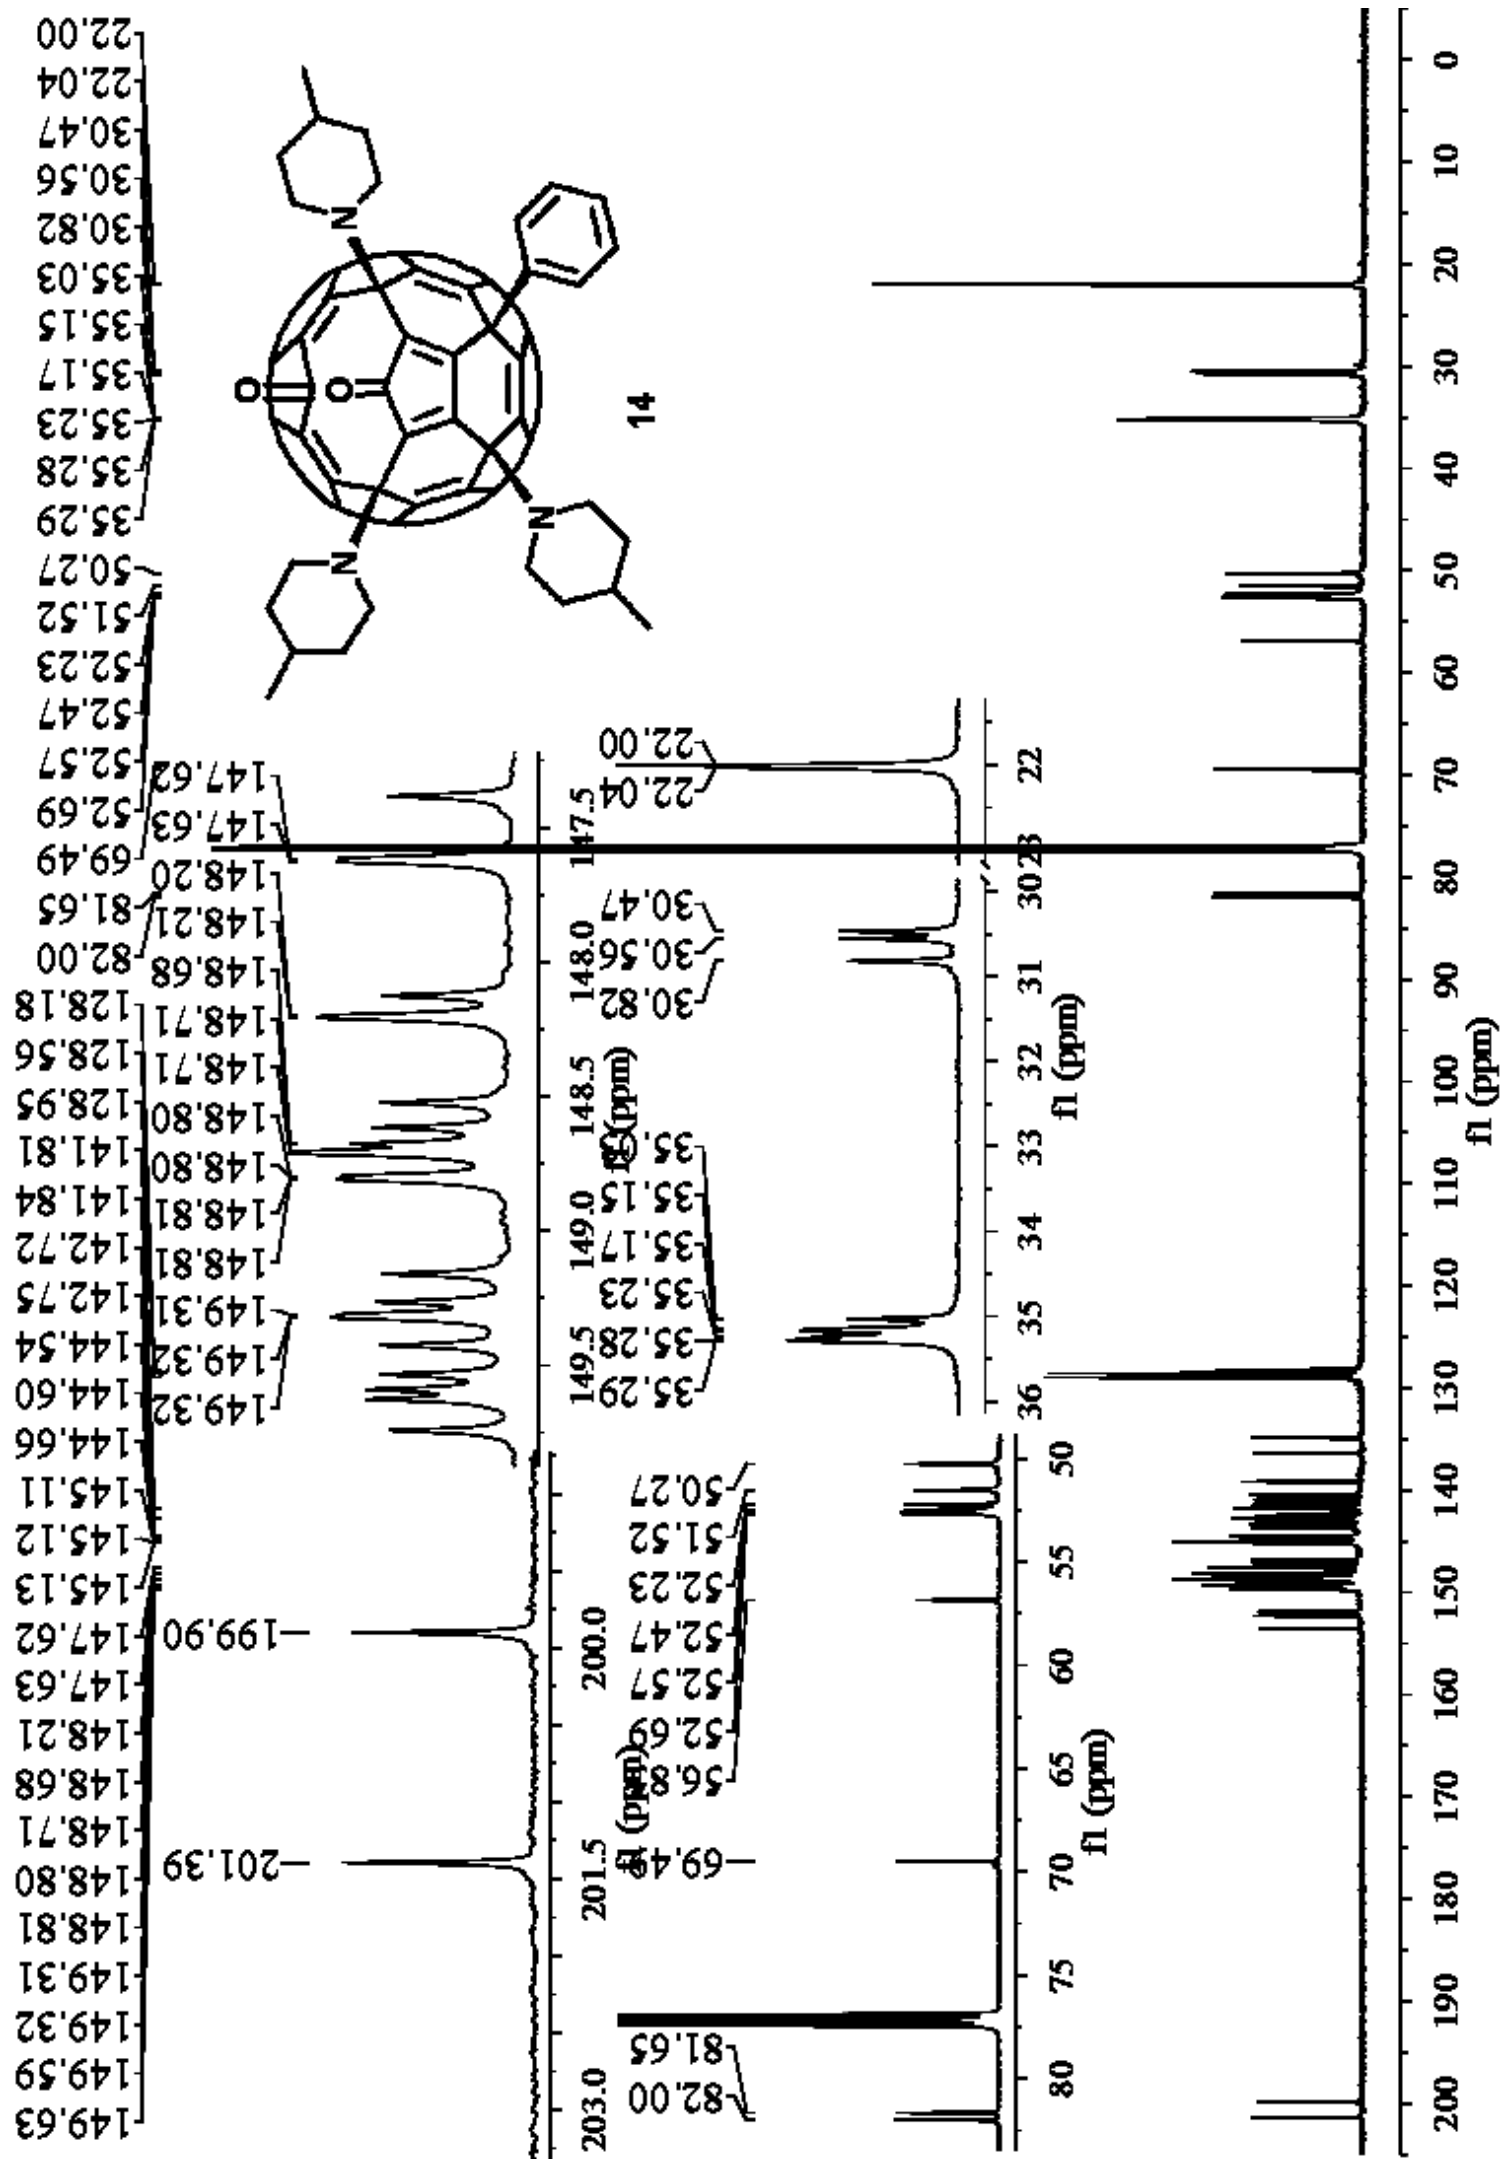

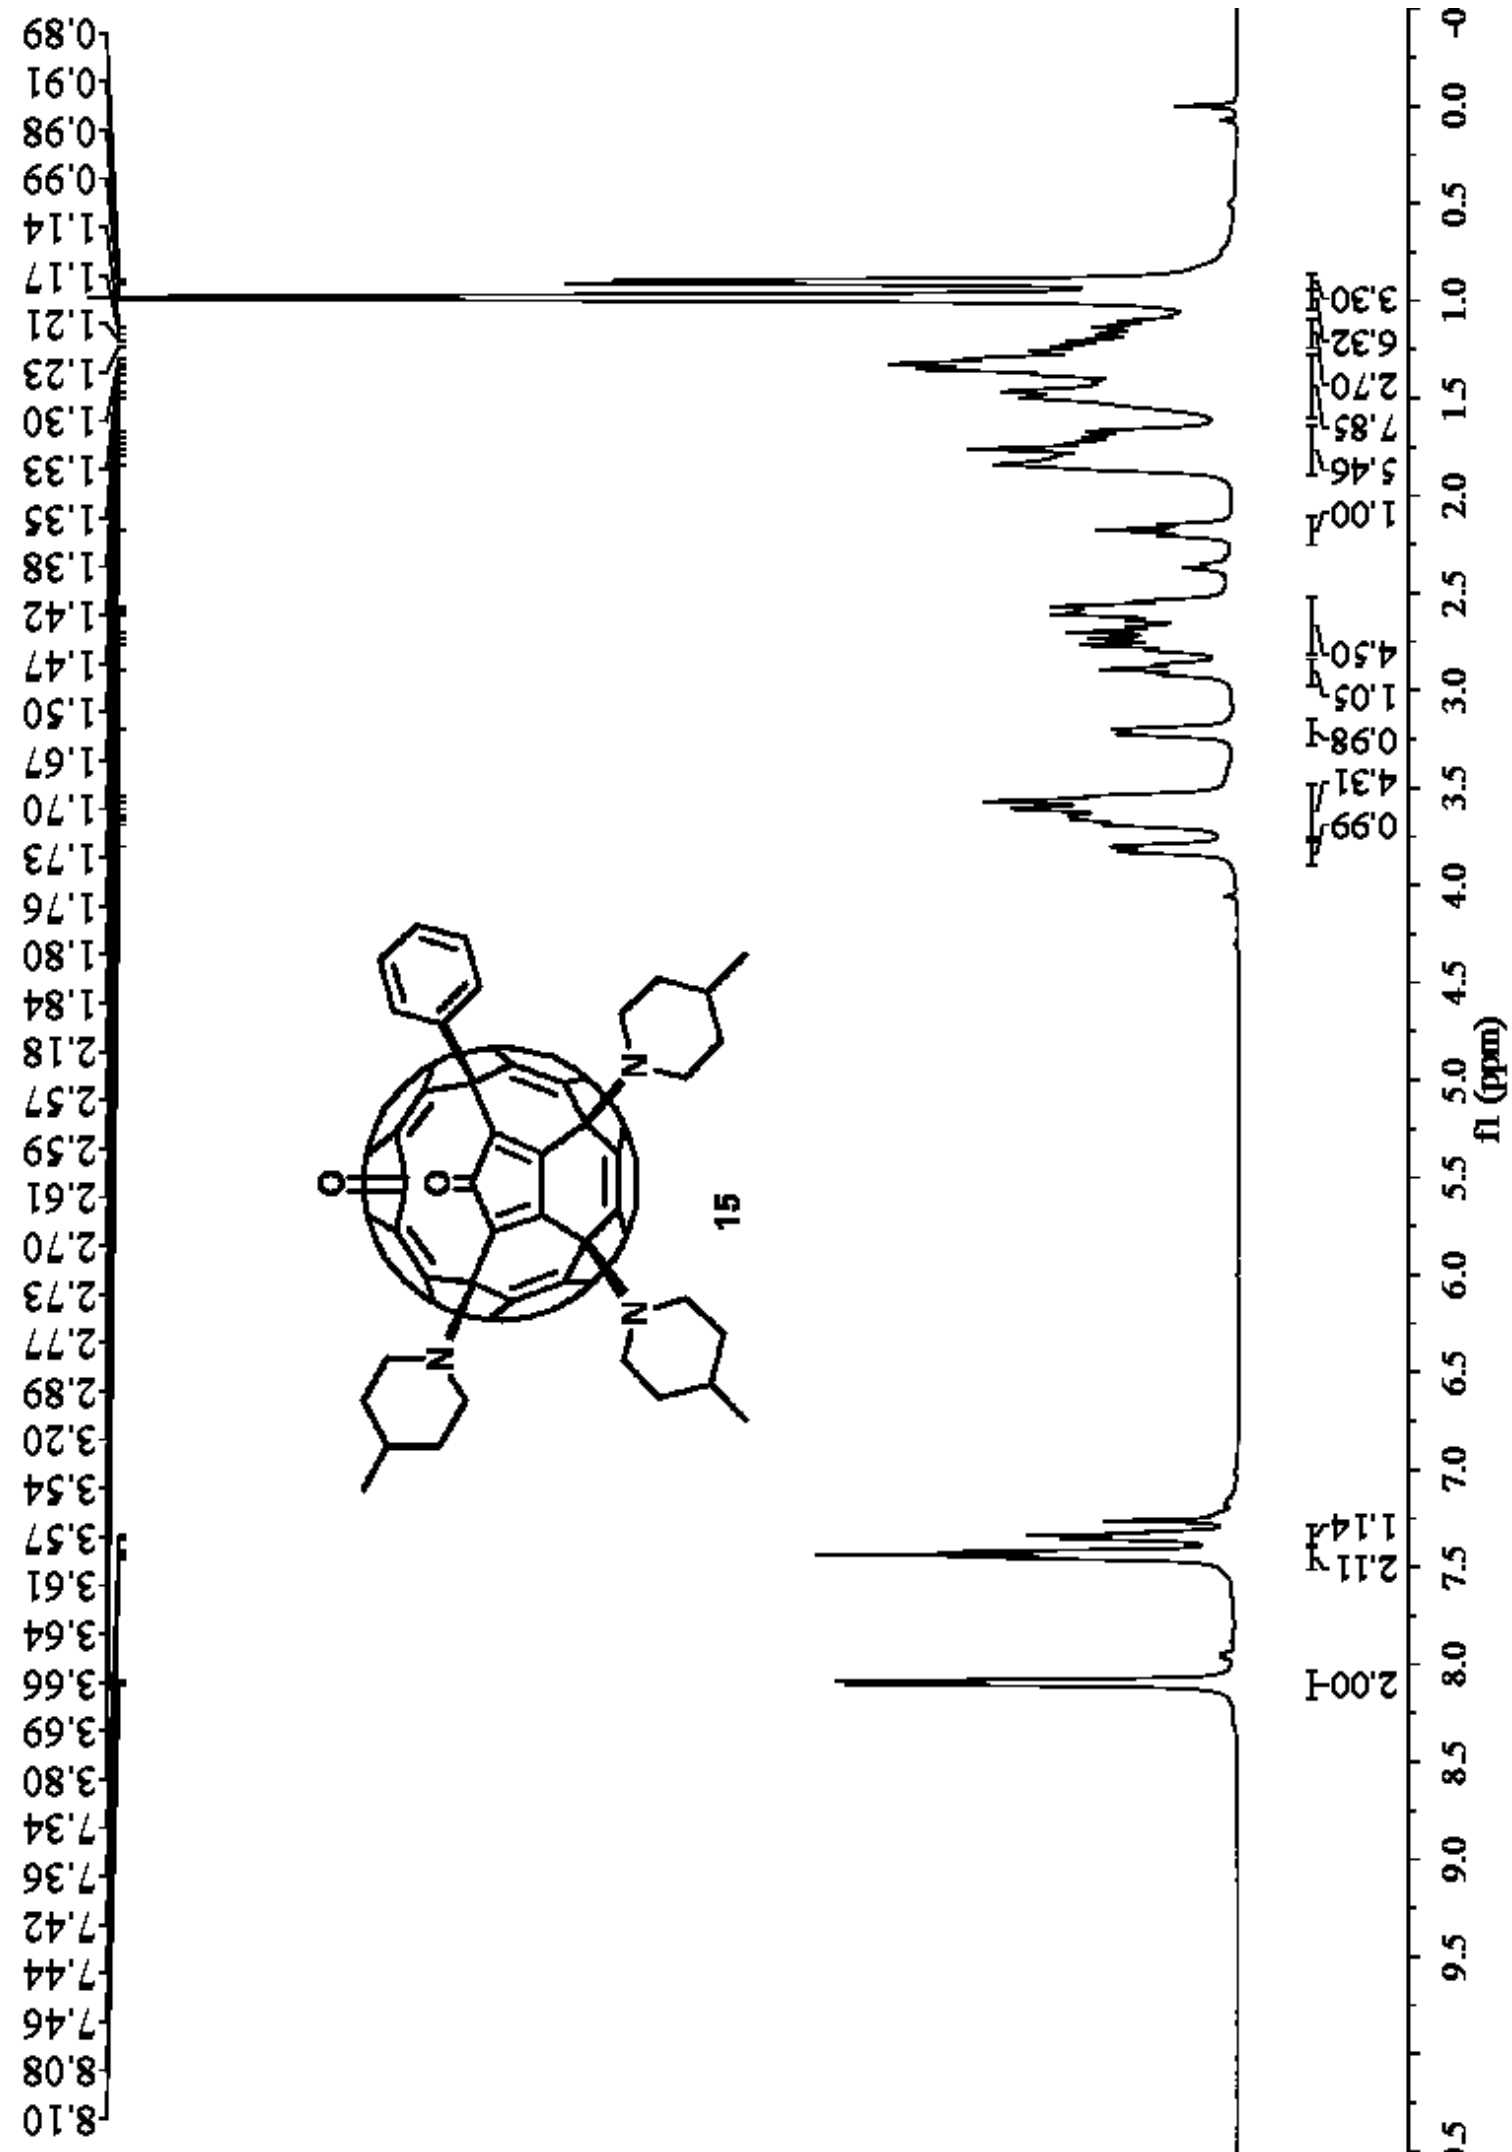



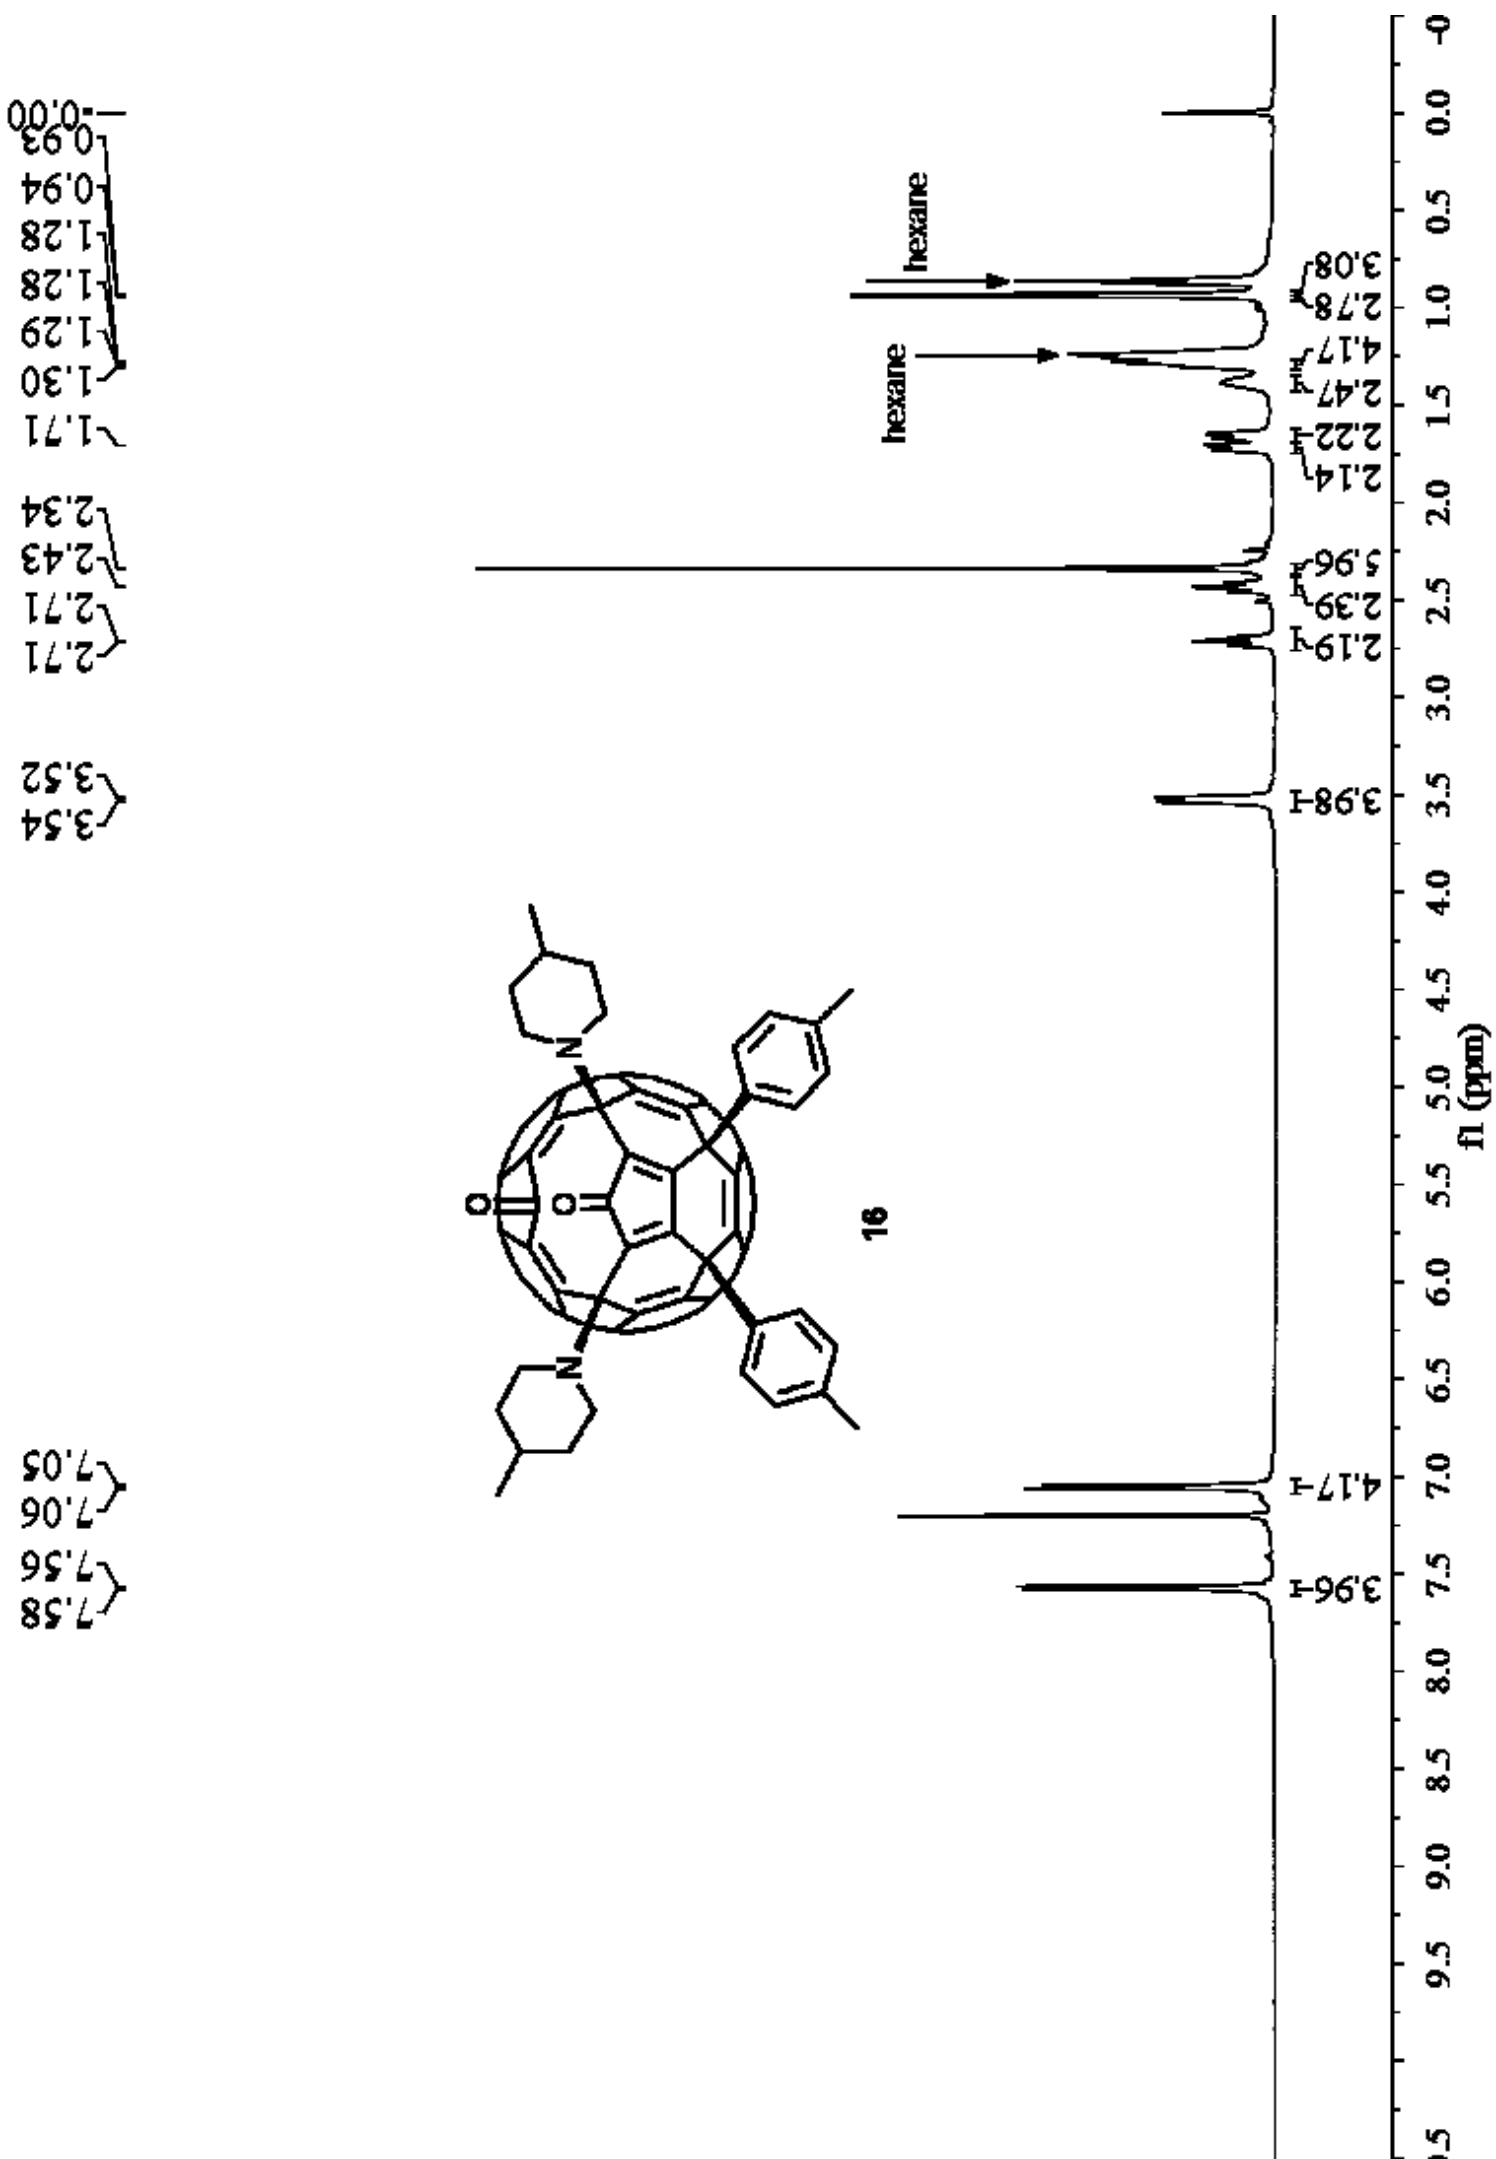



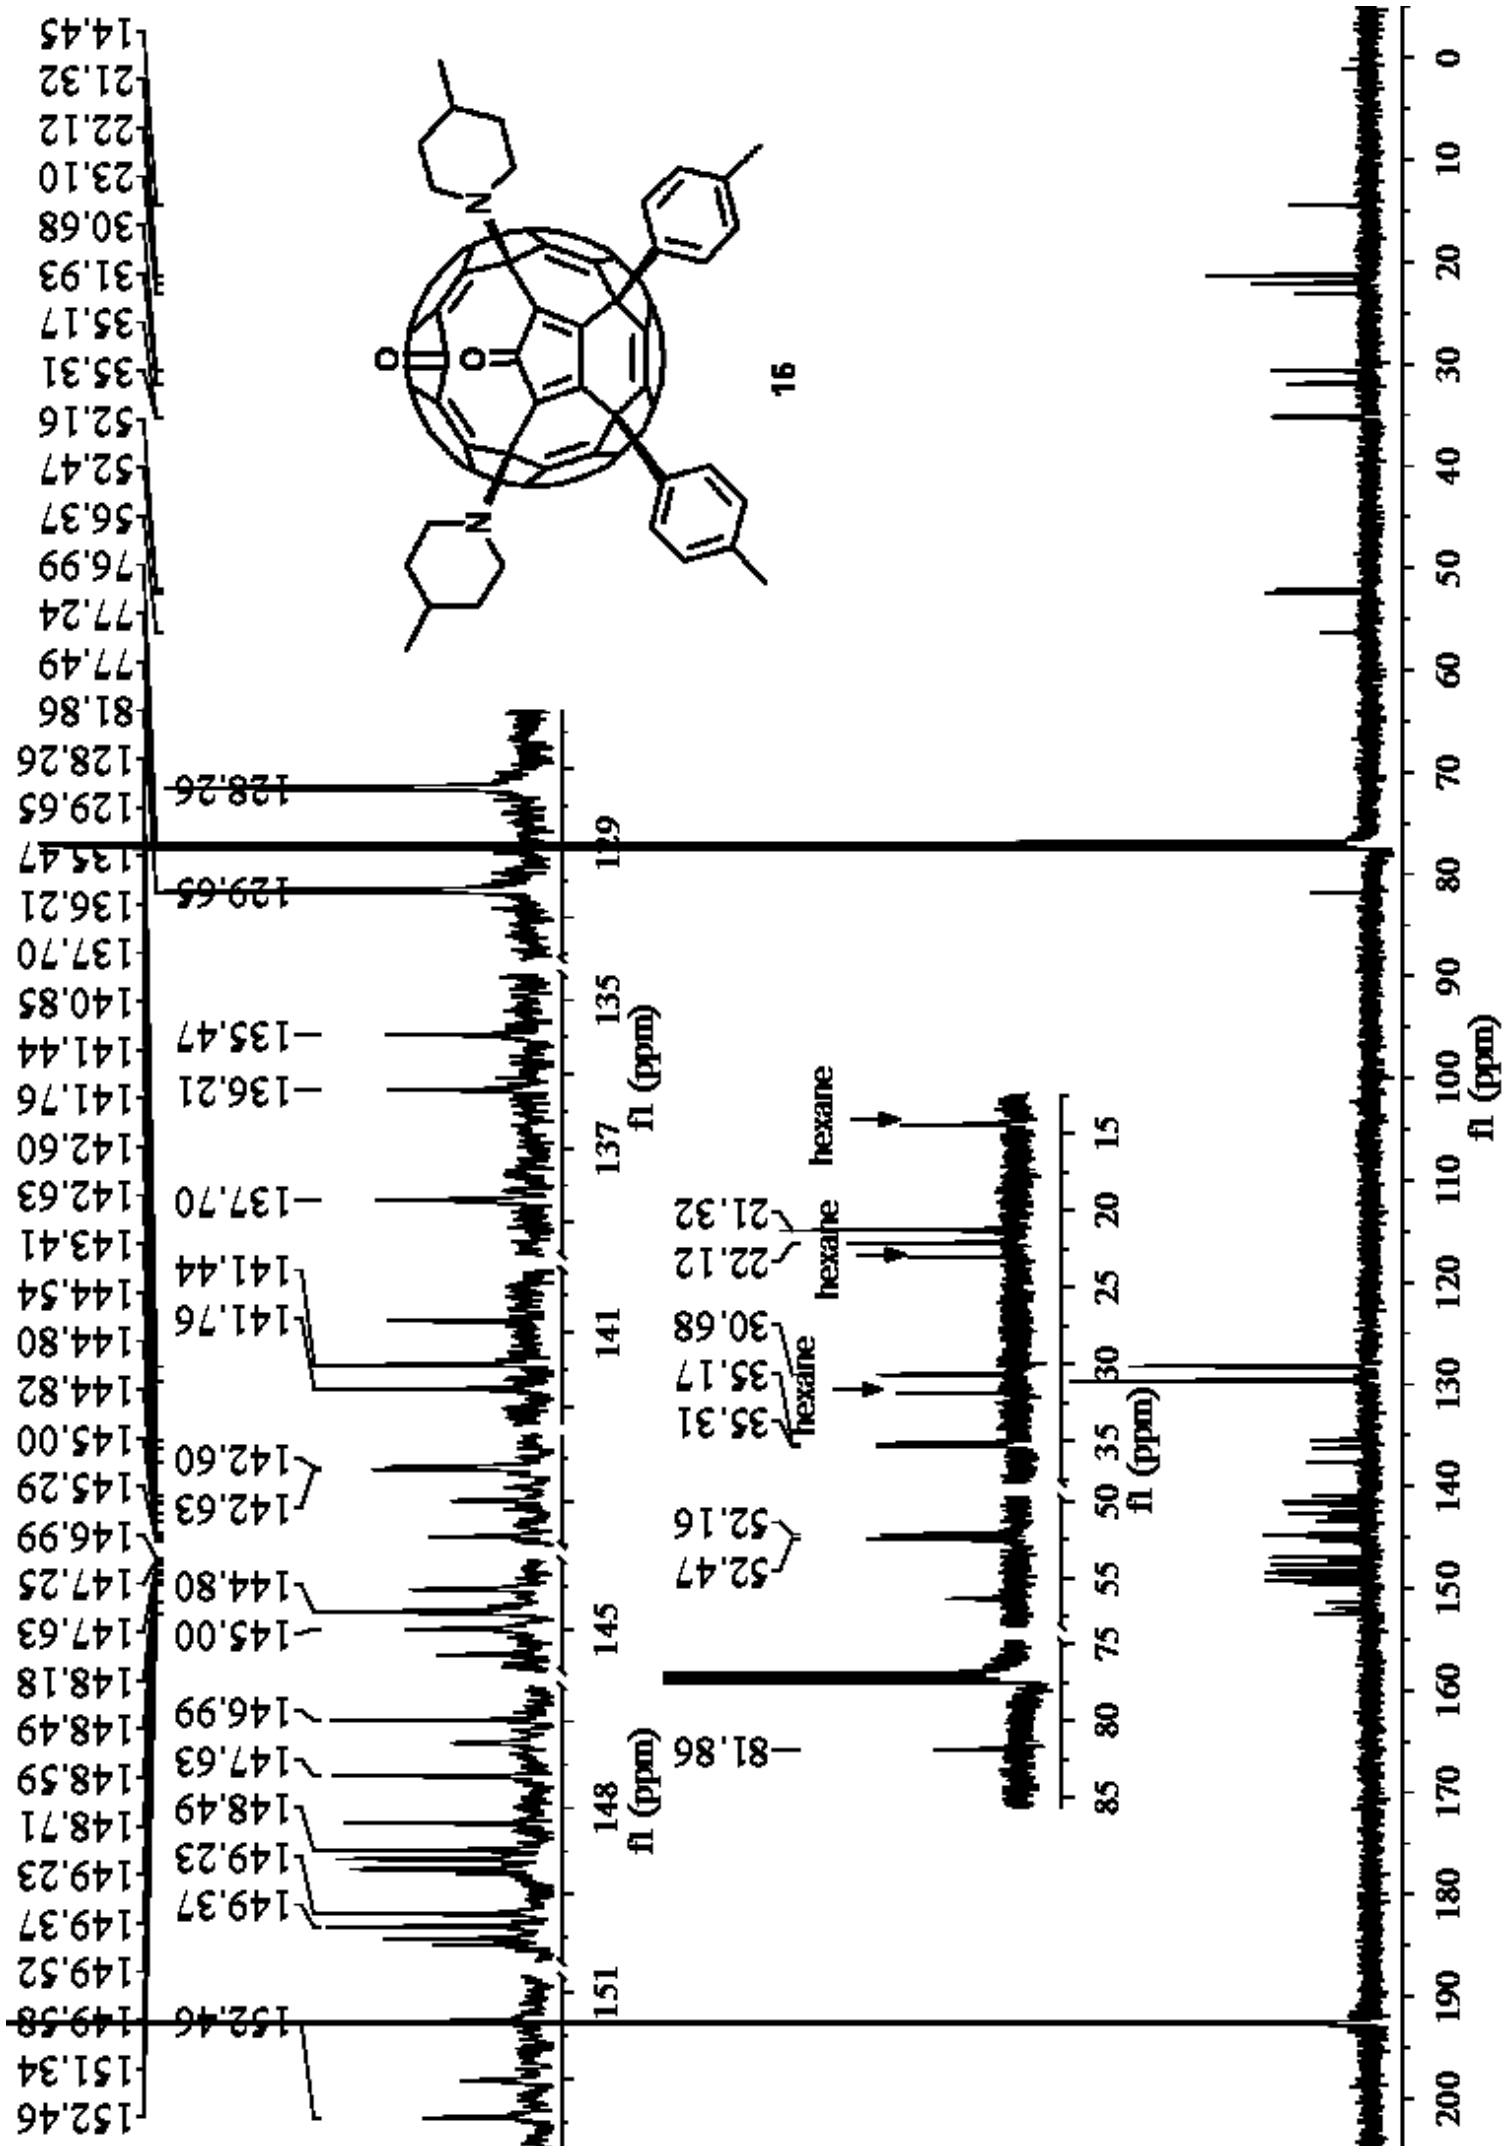

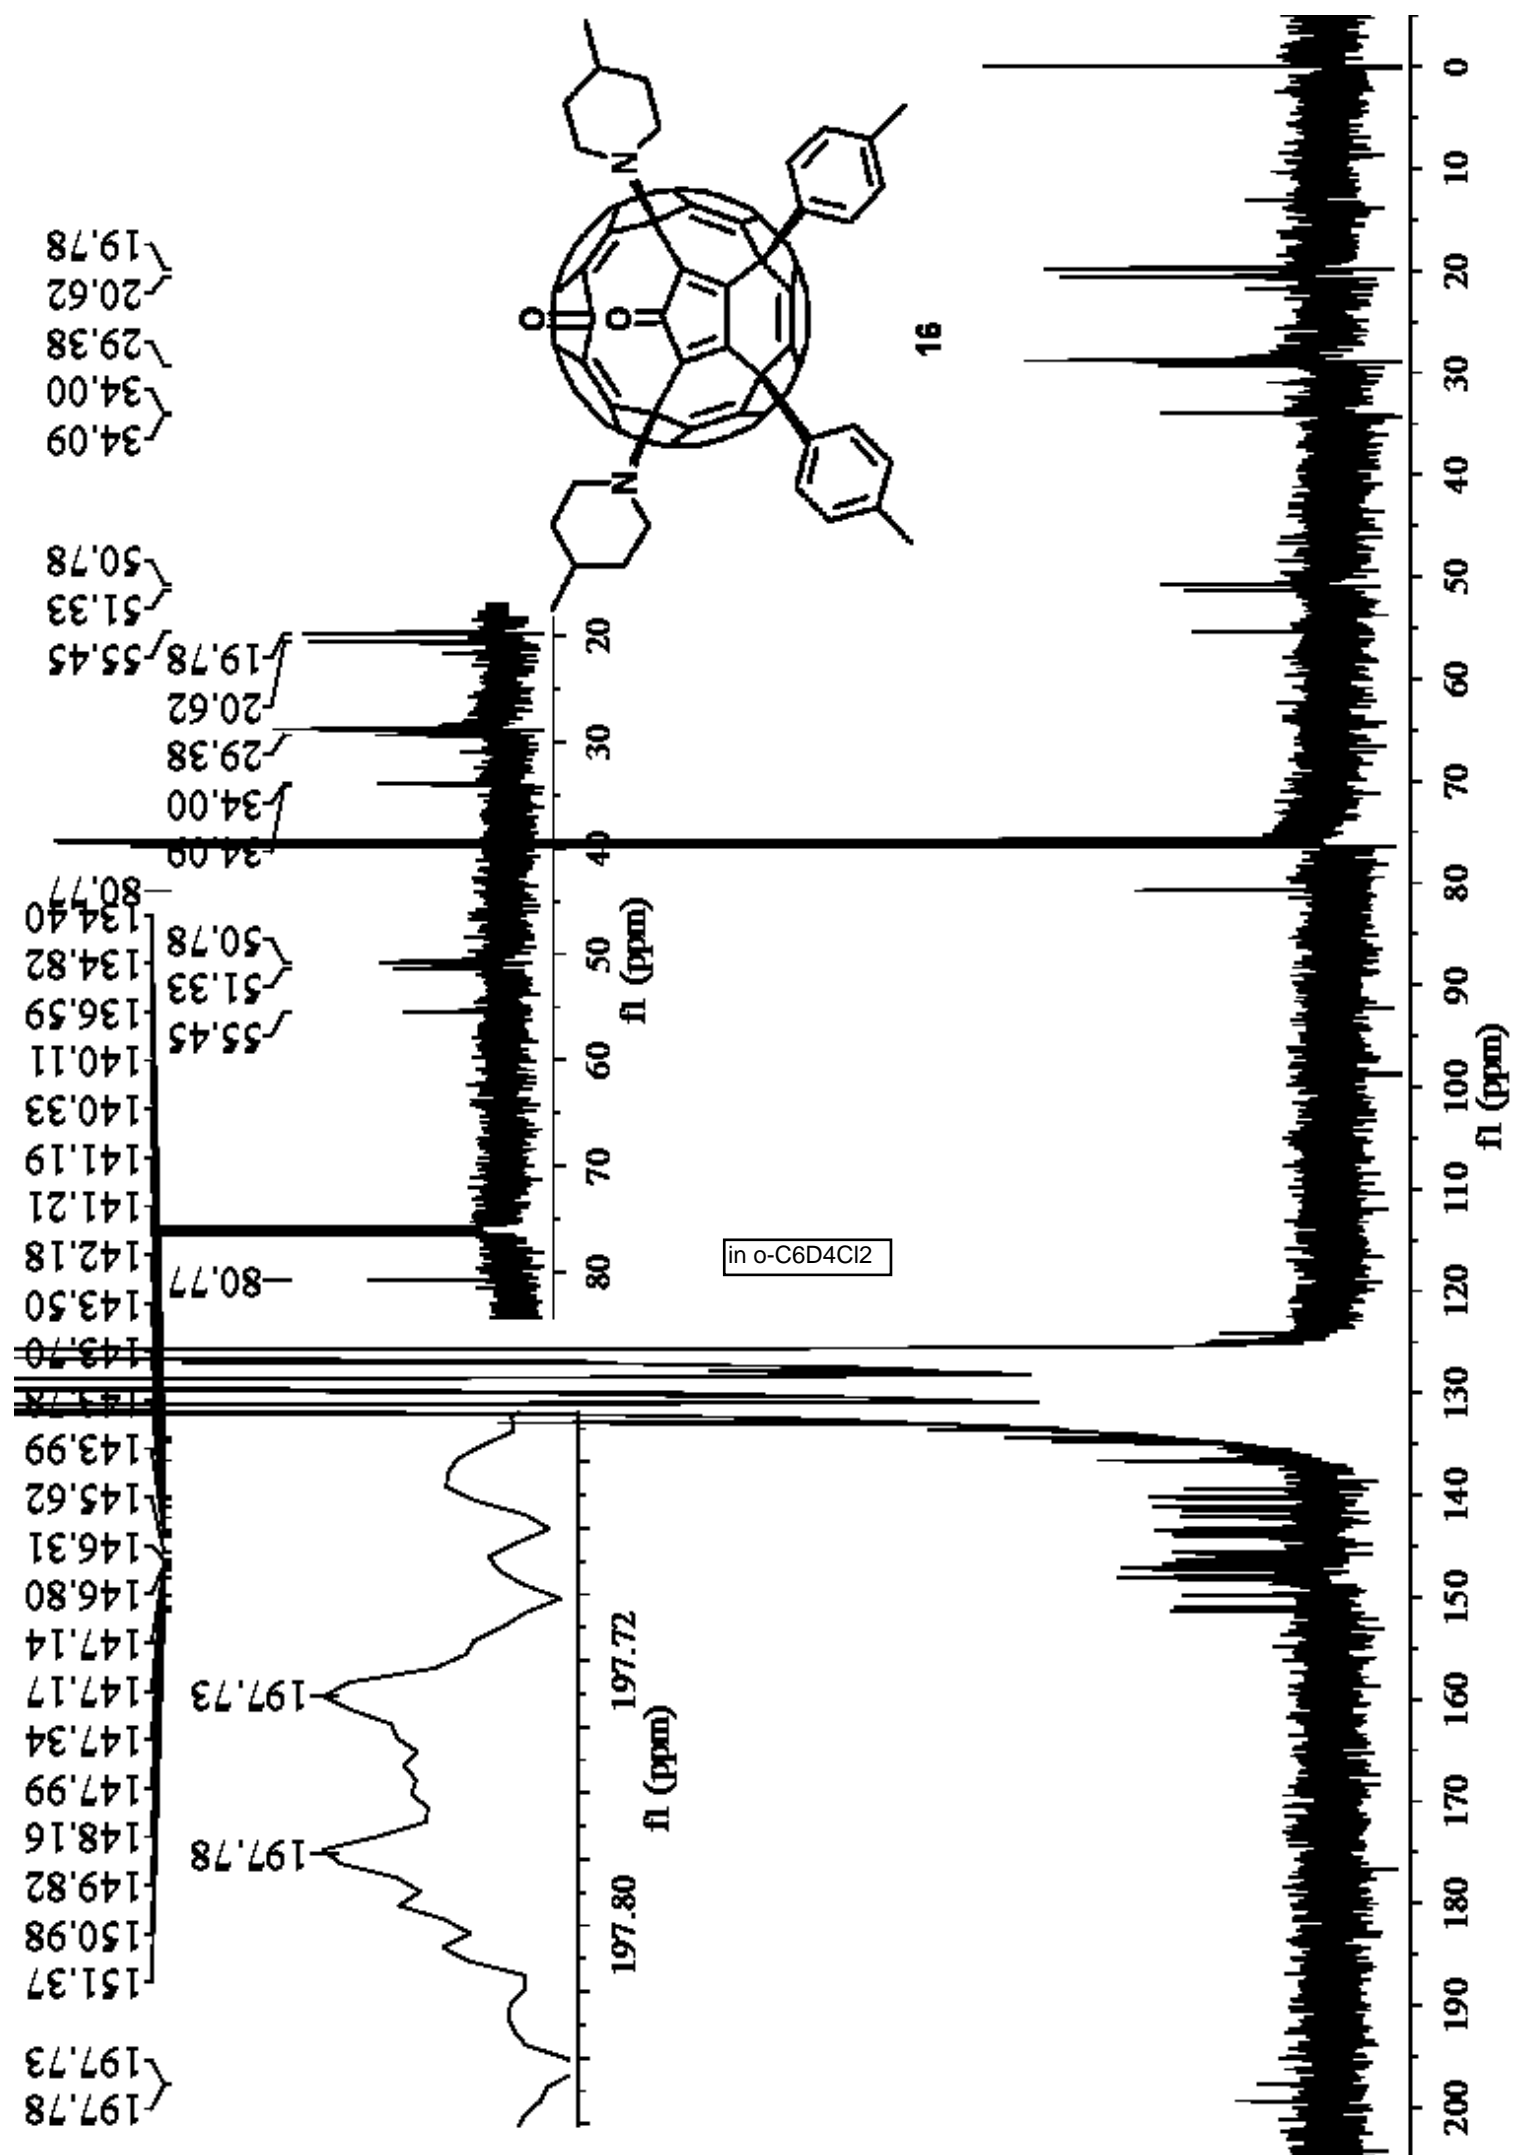

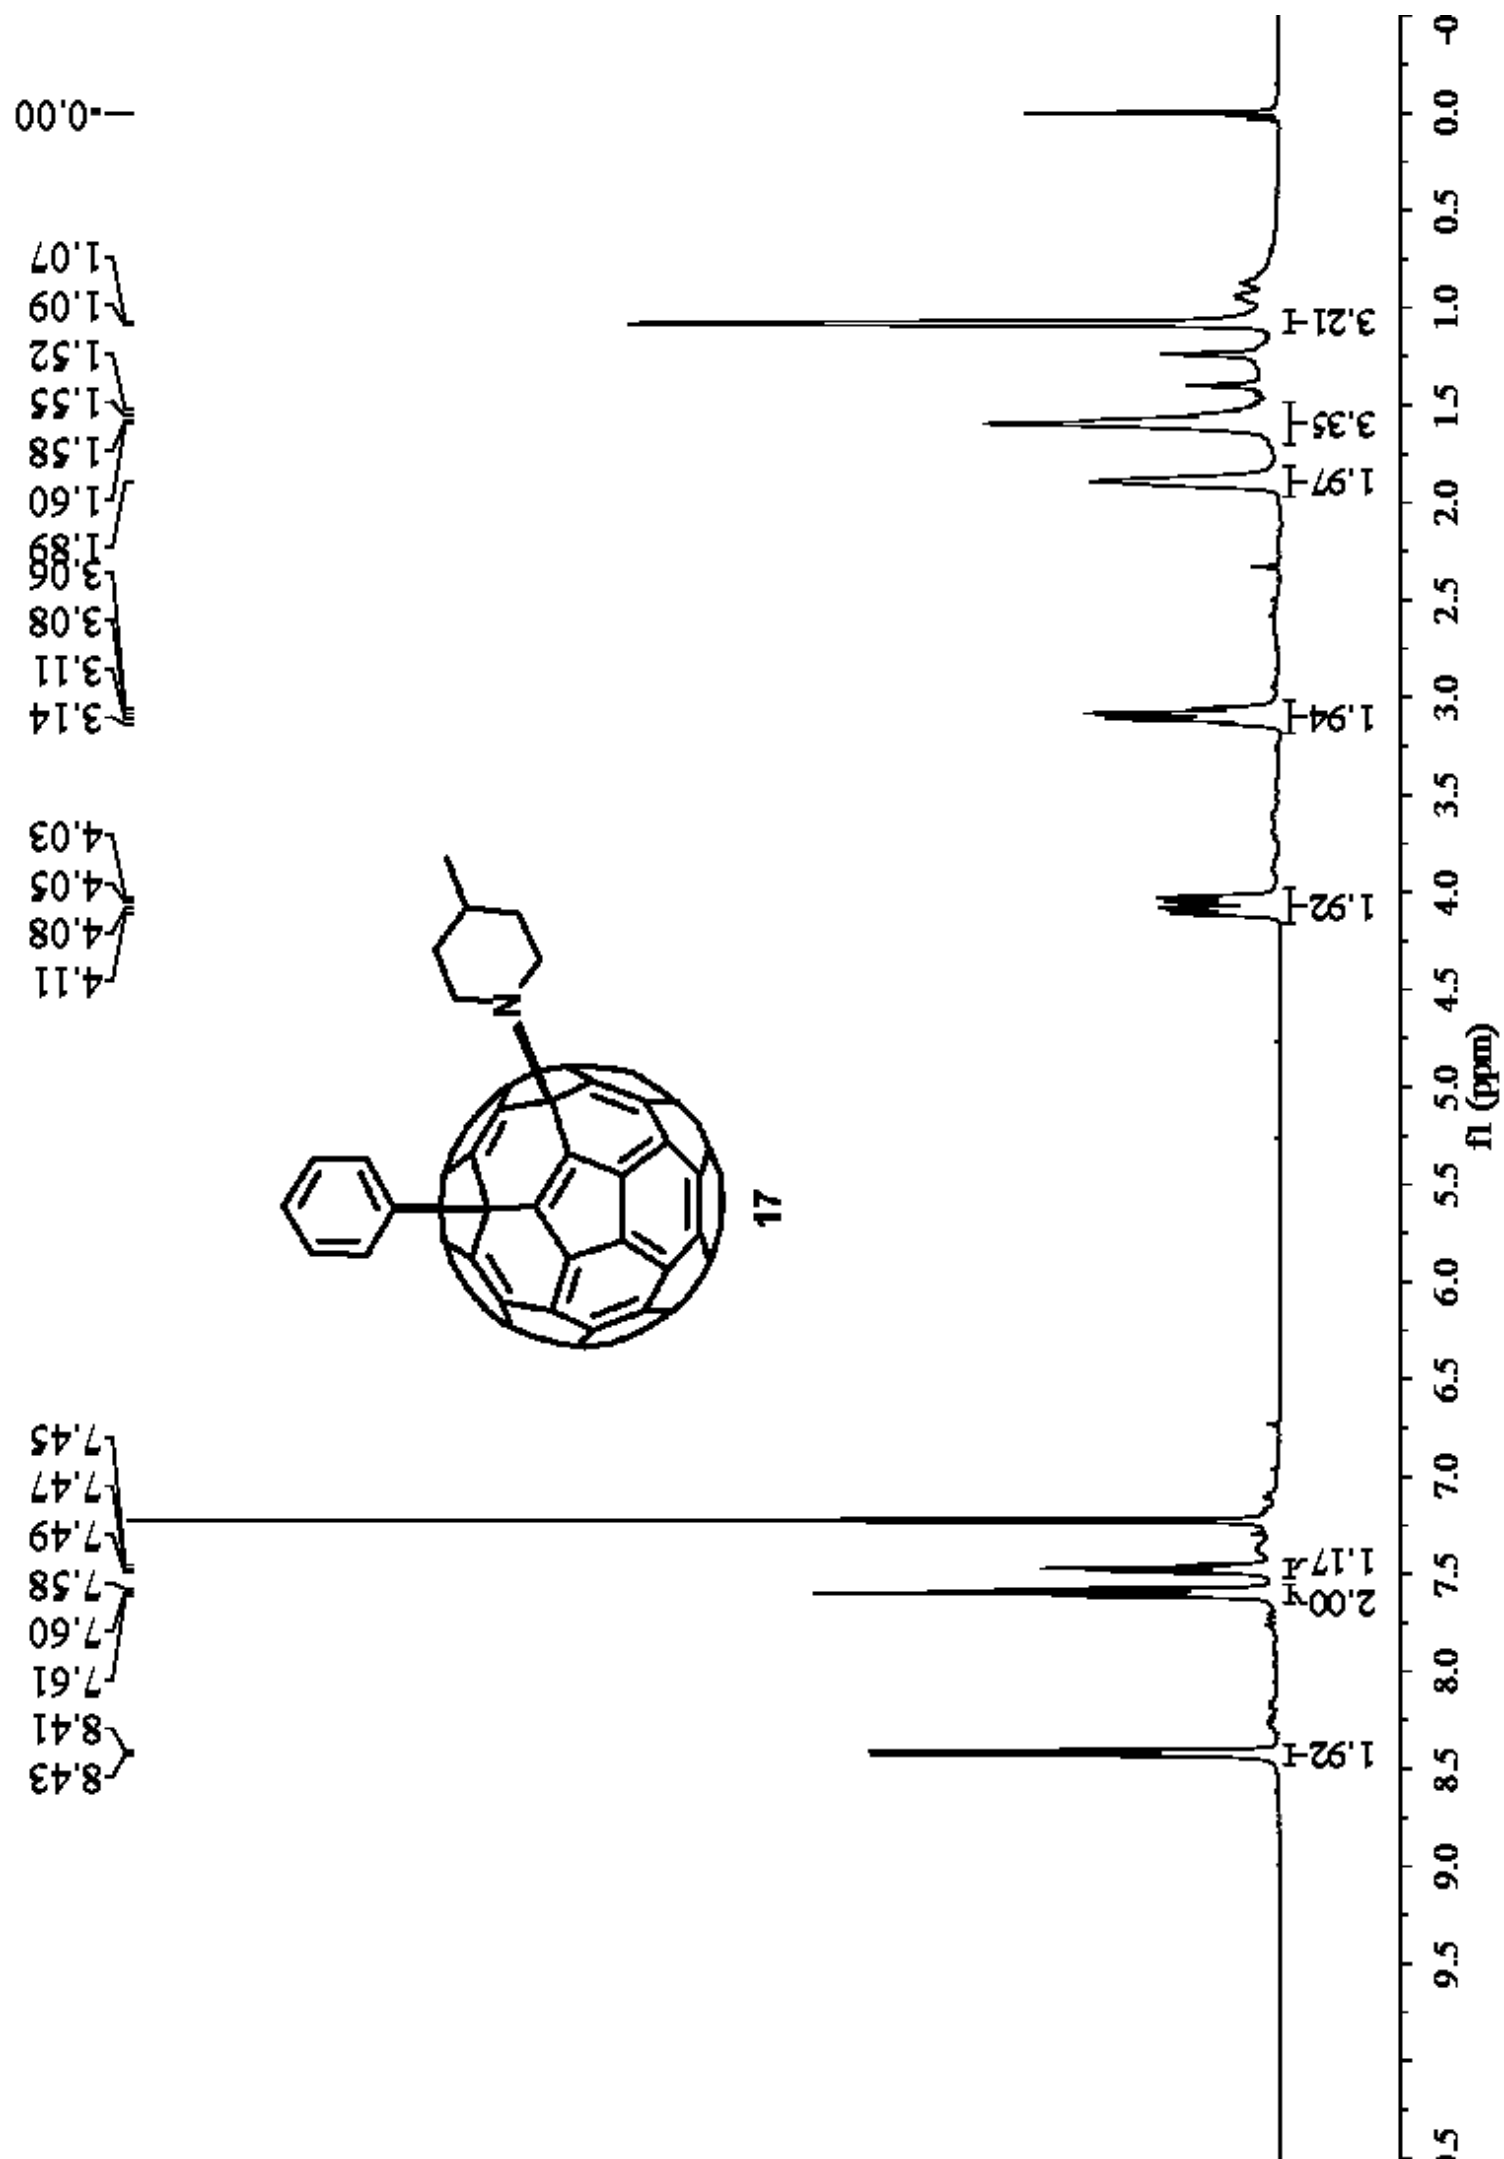

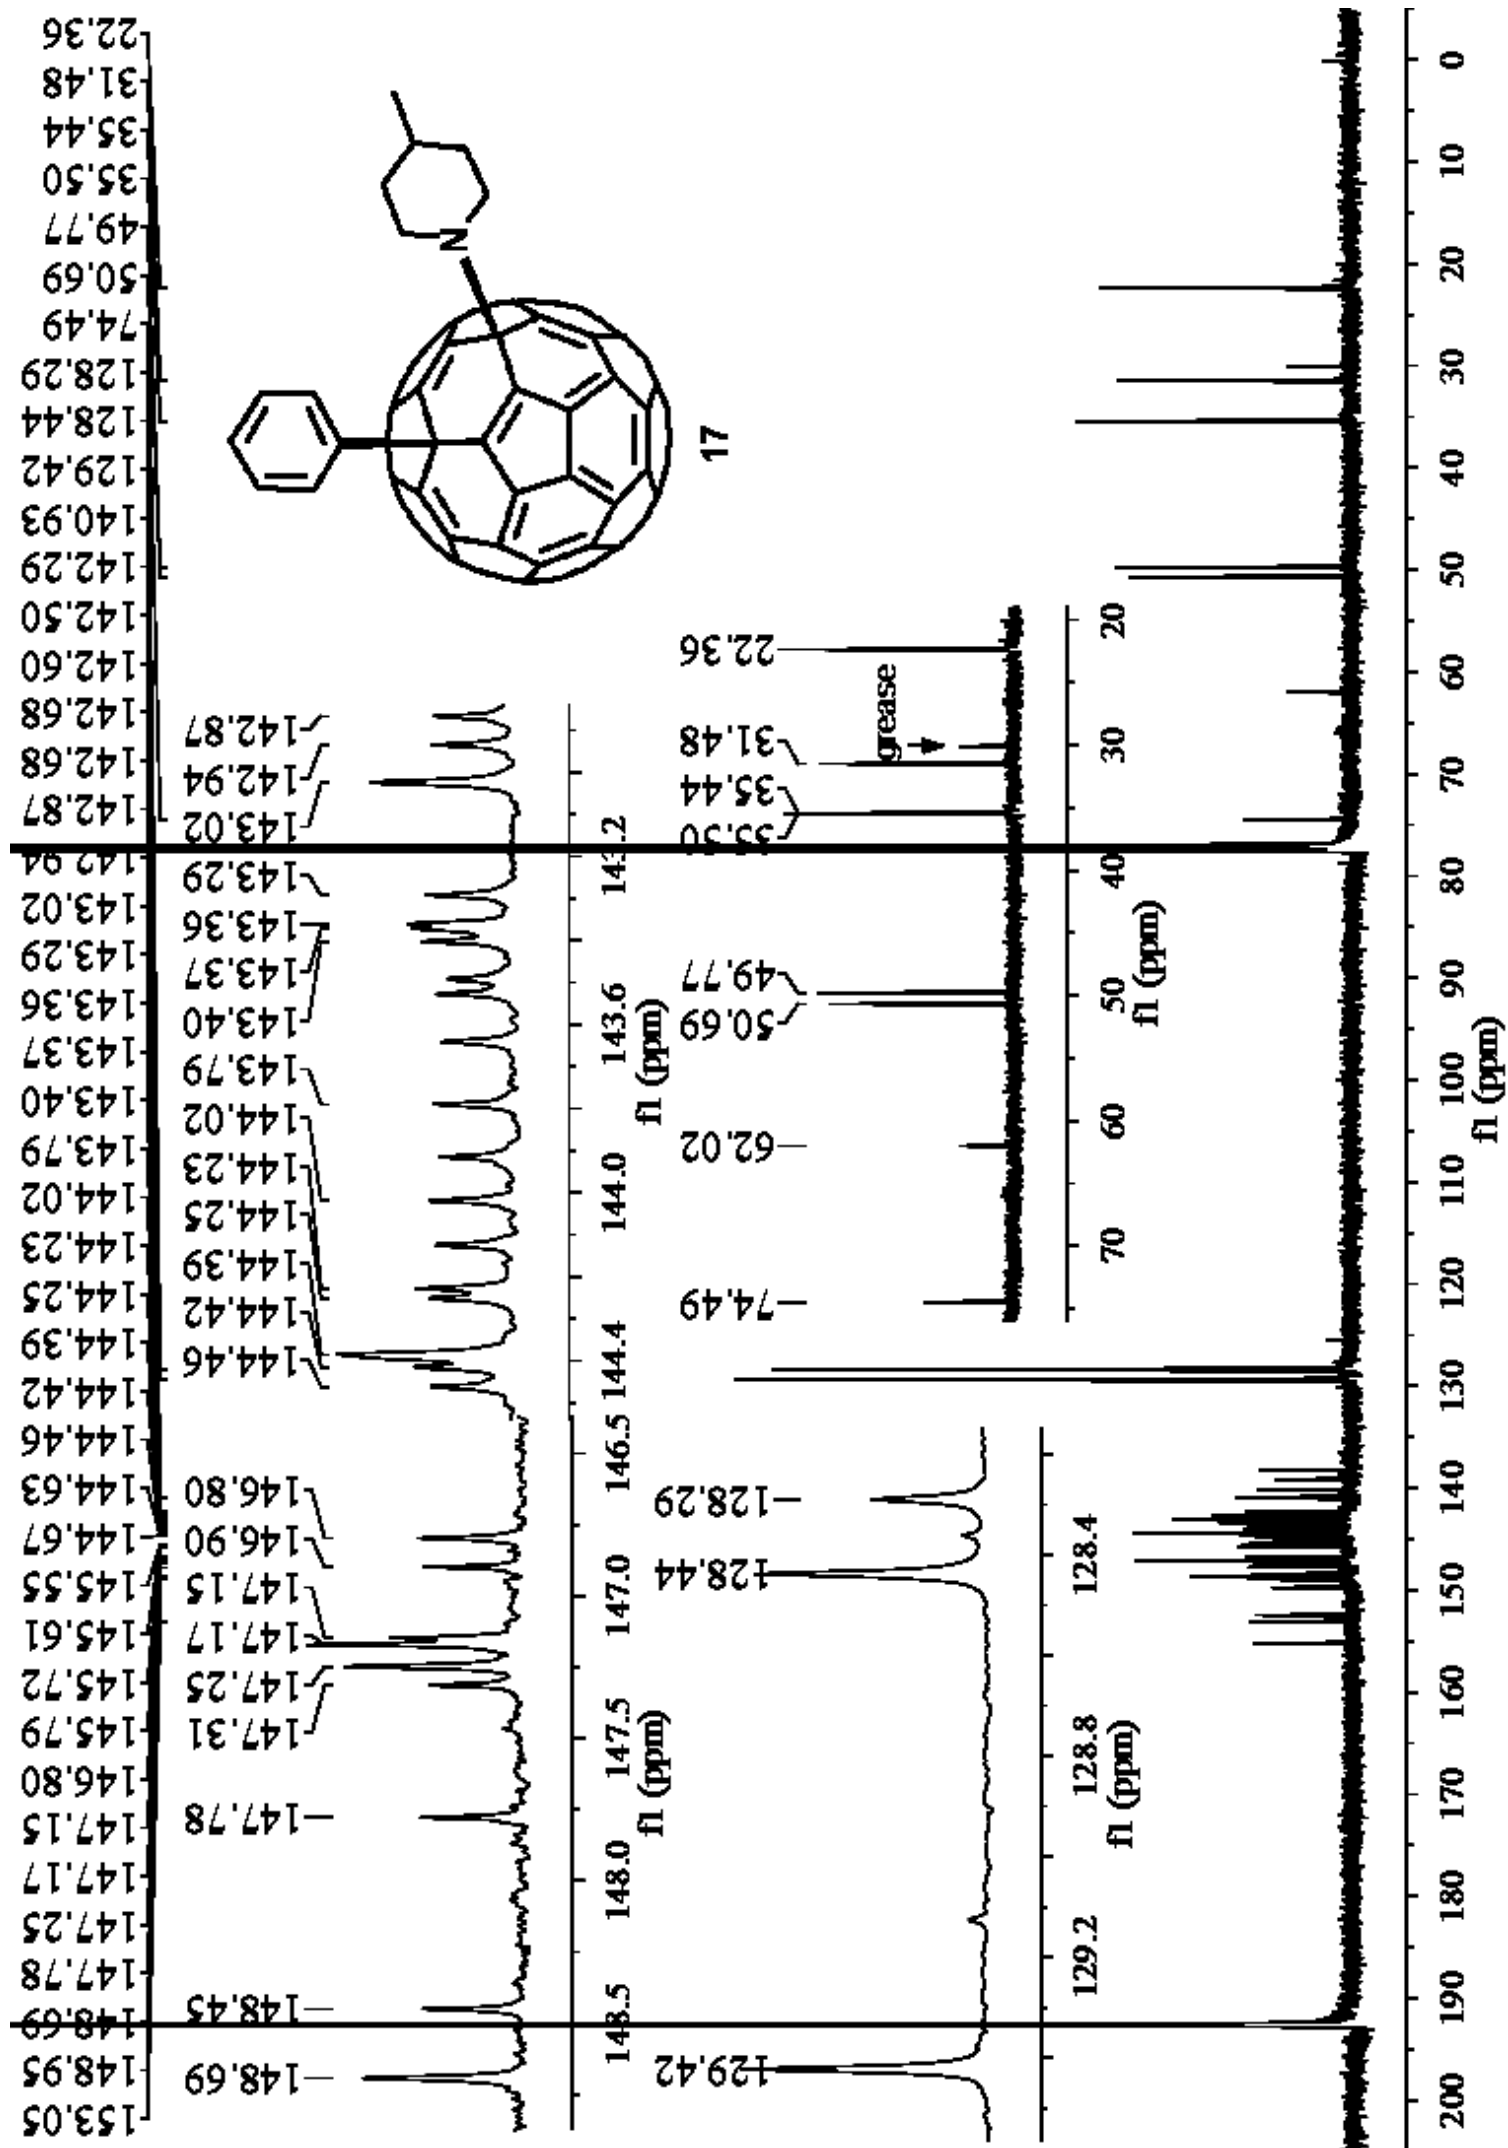

Supplement: Supplementary file 1 [file 3809506]
